# Supplementary material for: Identification of immune subsets with distinct lectin binding signatures using multi-parameter flow cytometry: correlations with disease activity in systemic lupus erythematosus
Source: PubMed Central journal article supplement (PMC11106380; doi:10.3389/fimmu.2024.1380481), 2024-05-07

Compensation  
of  
T/NK/NKT-cell panel

# Unstained

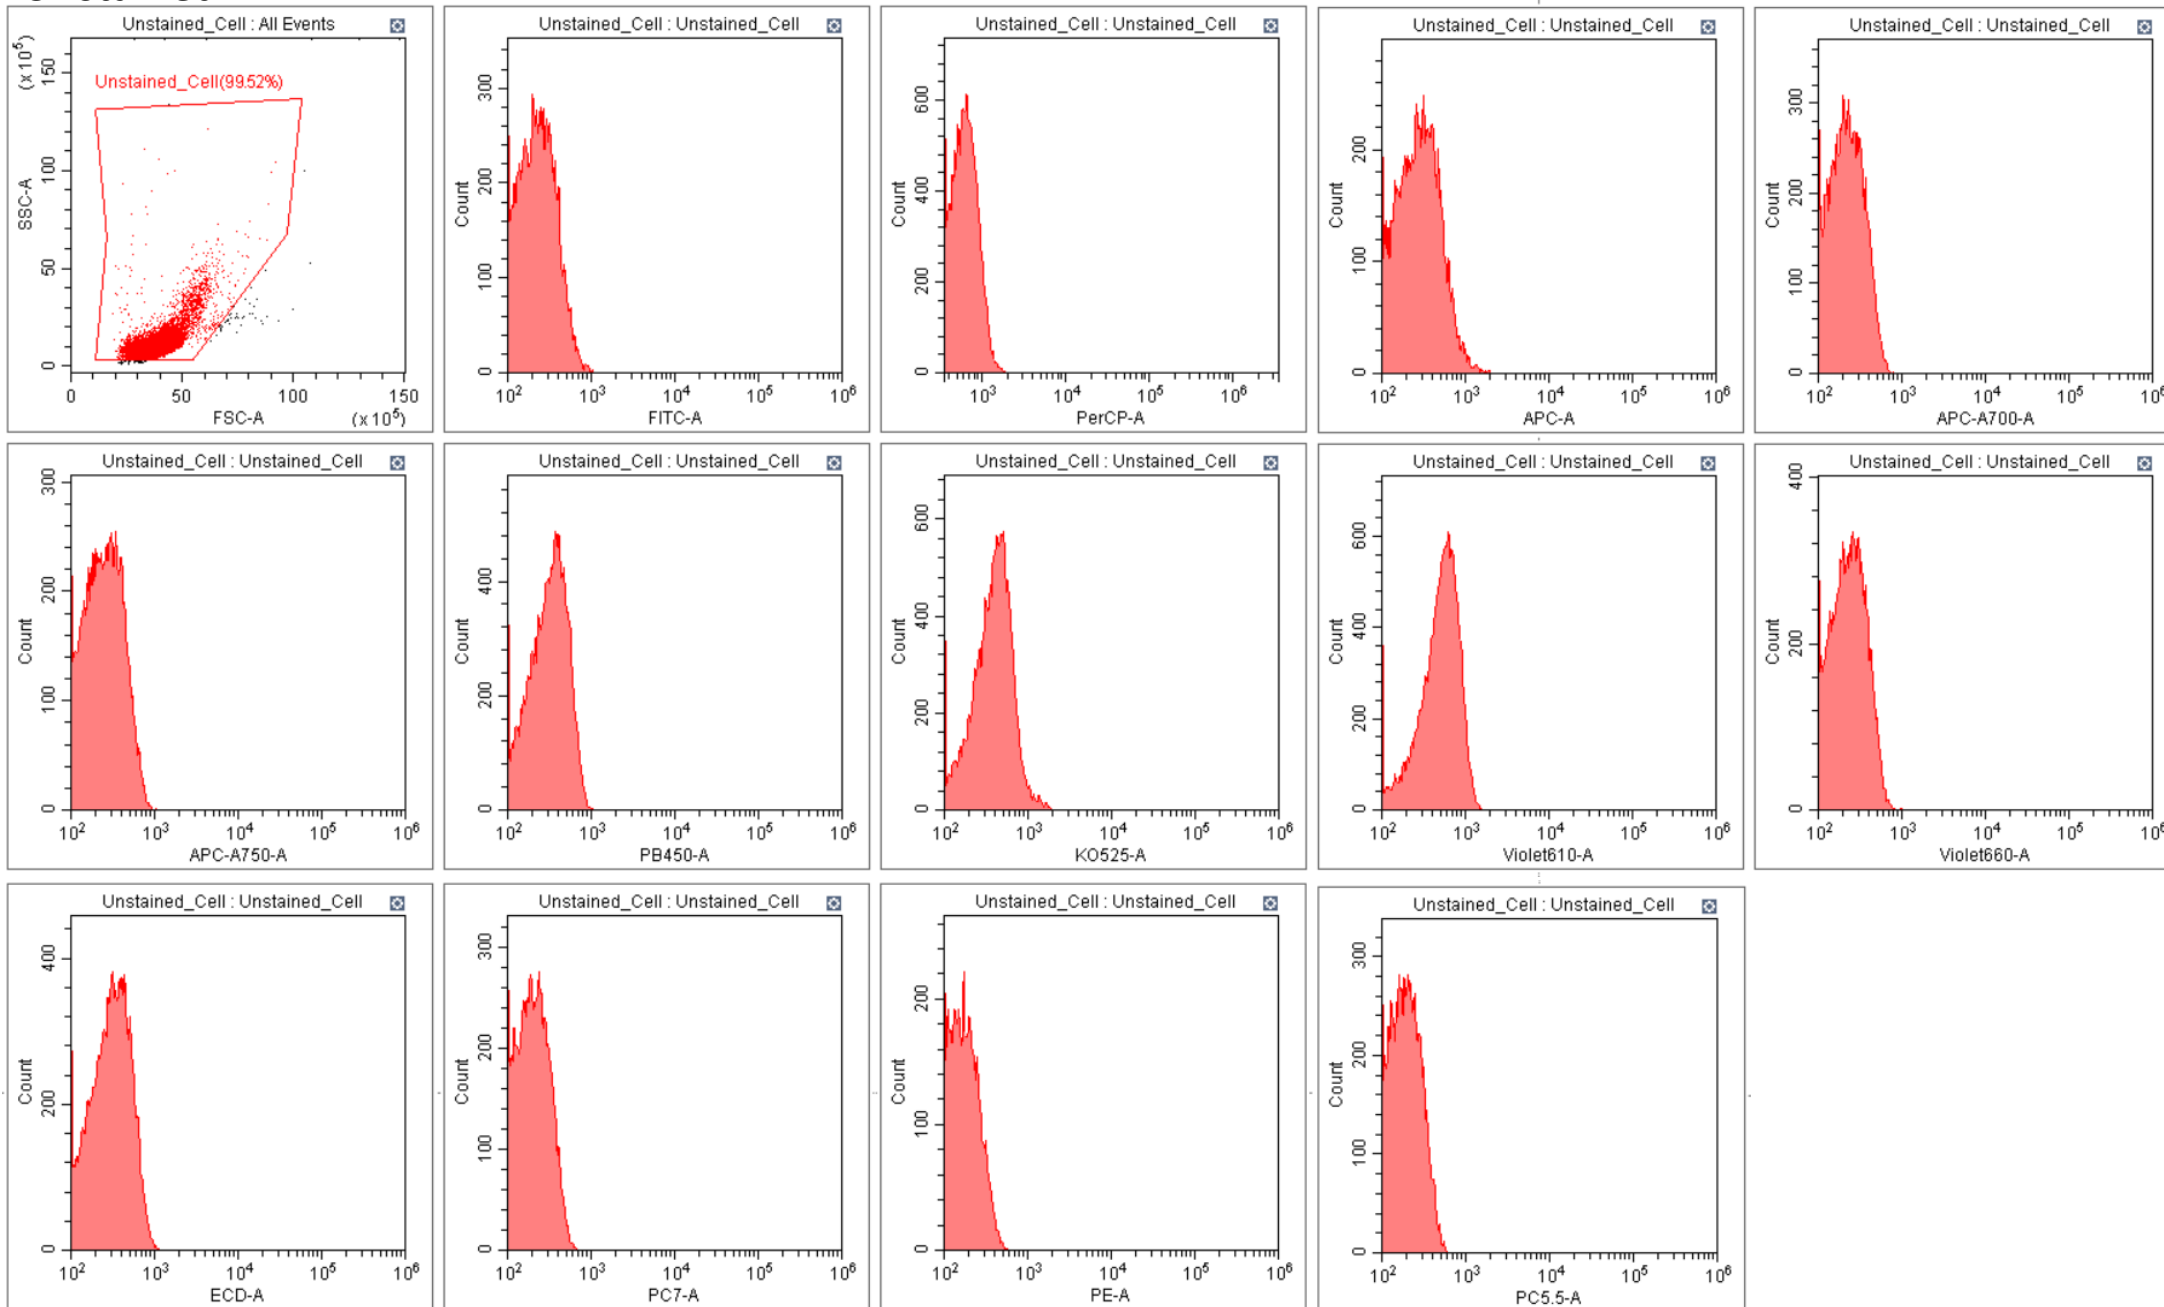

# SNA-FITC

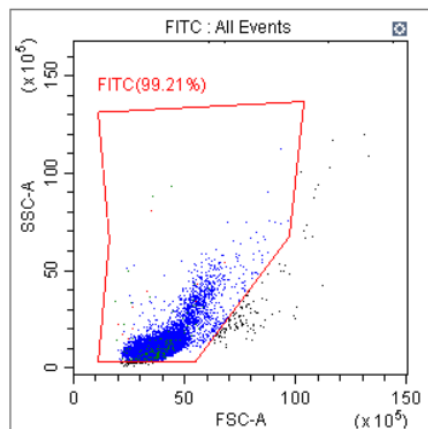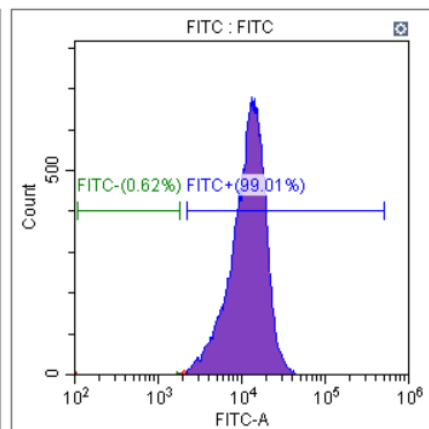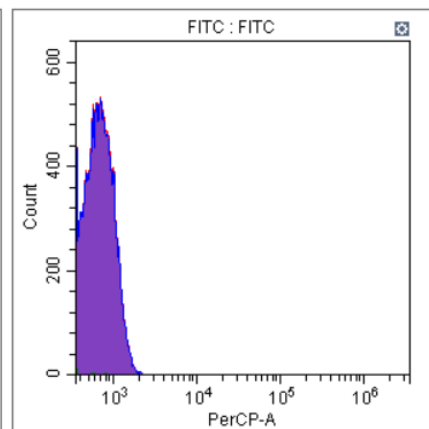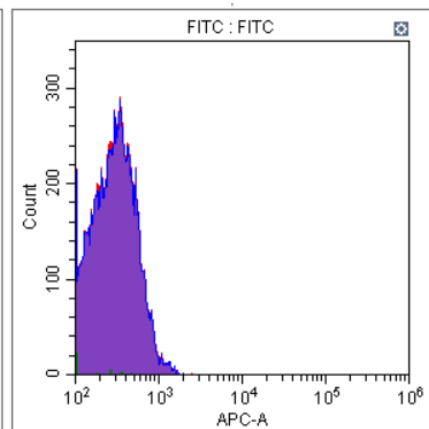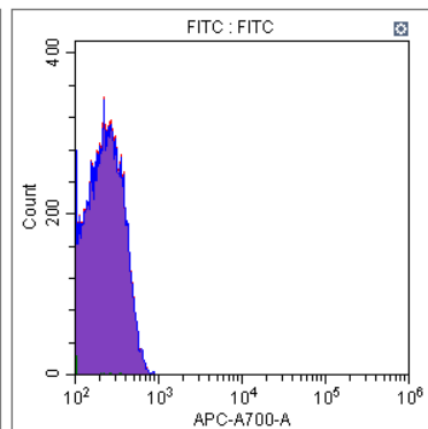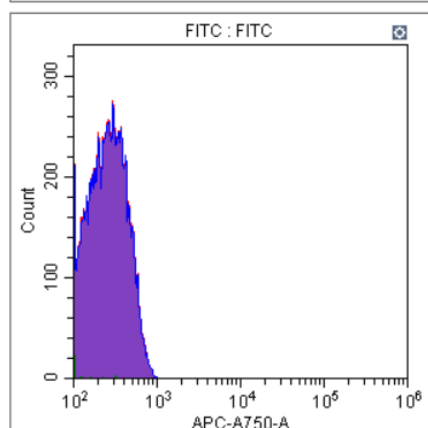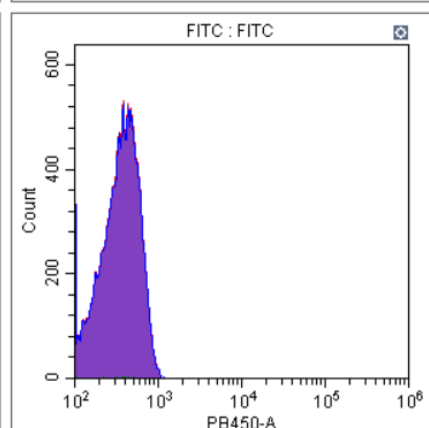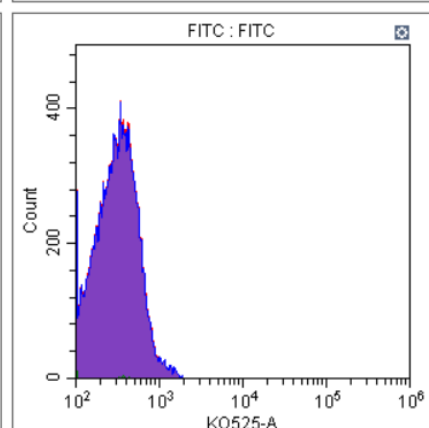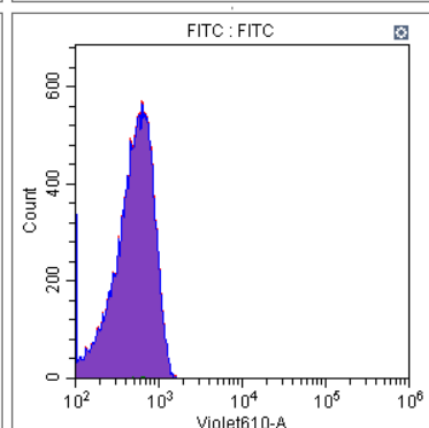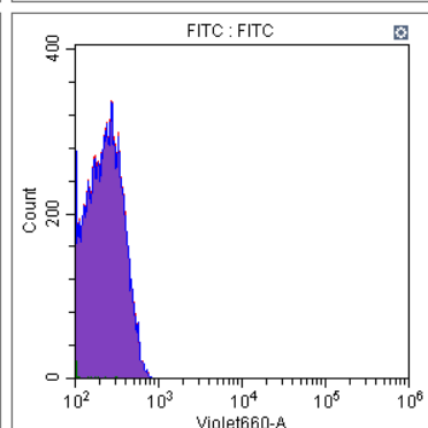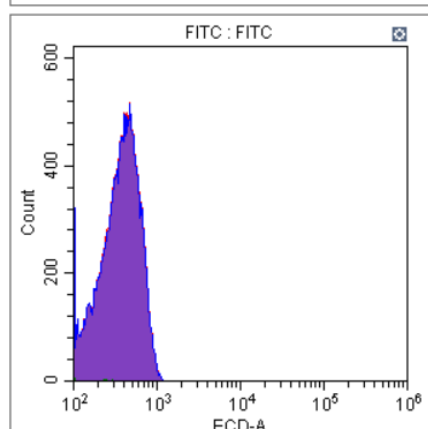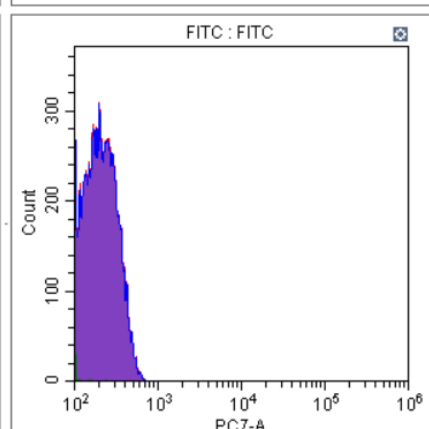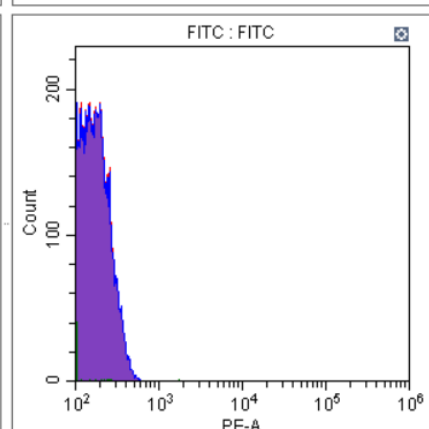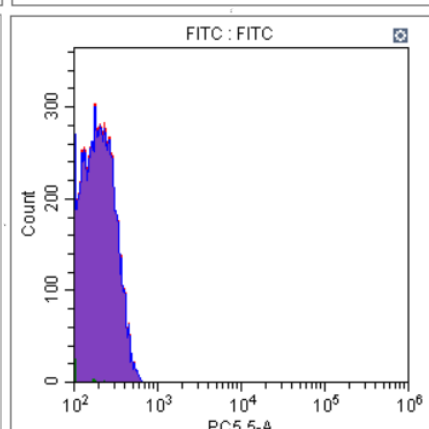

# CD8-PerCP

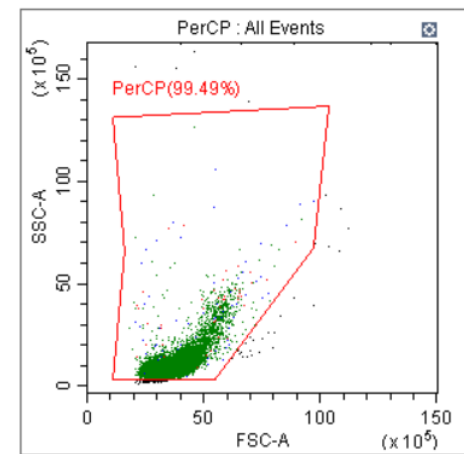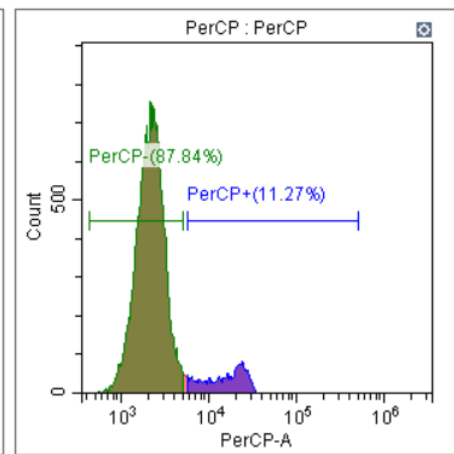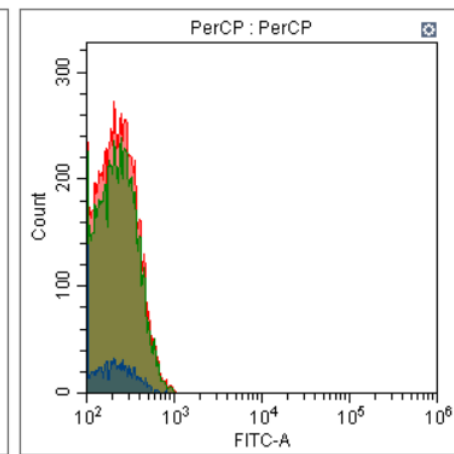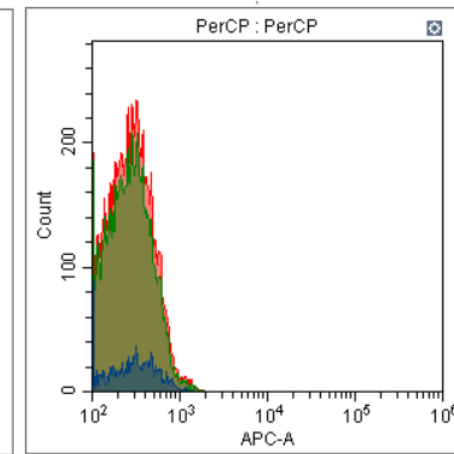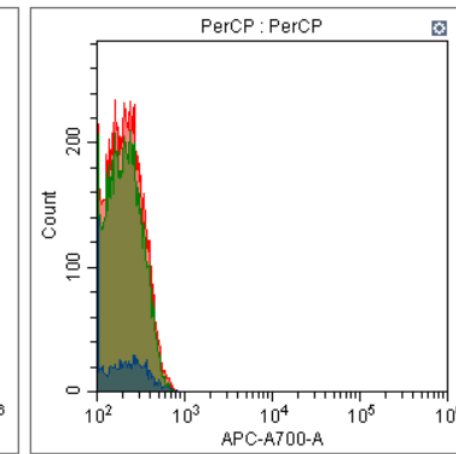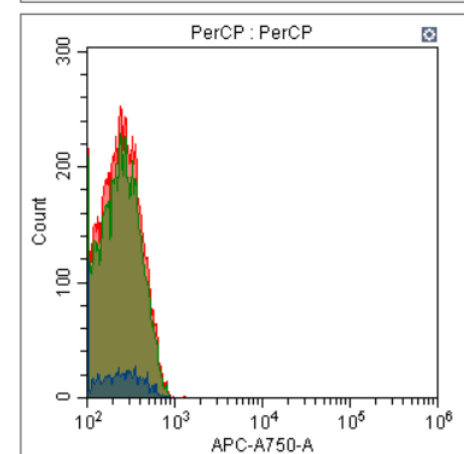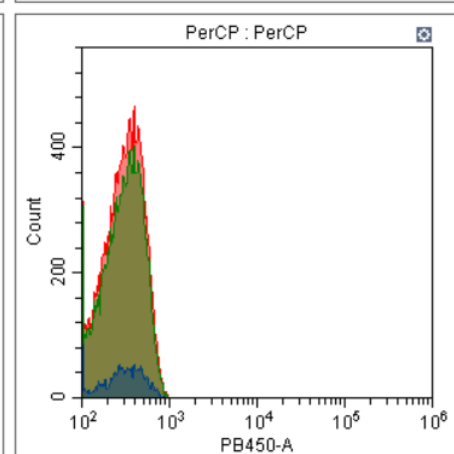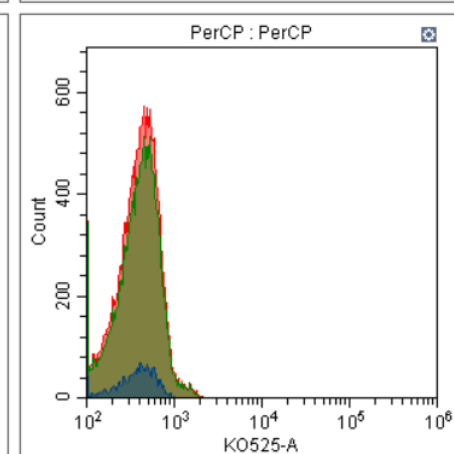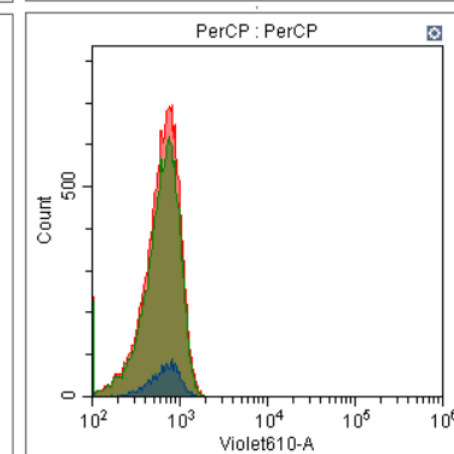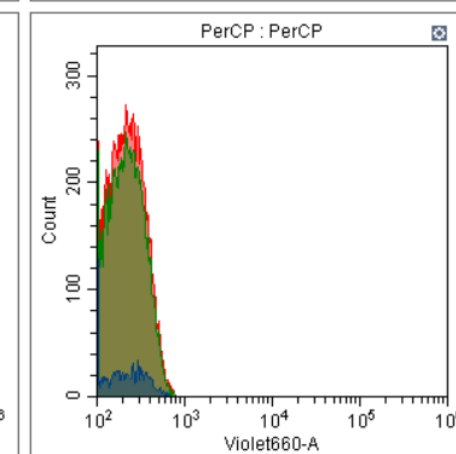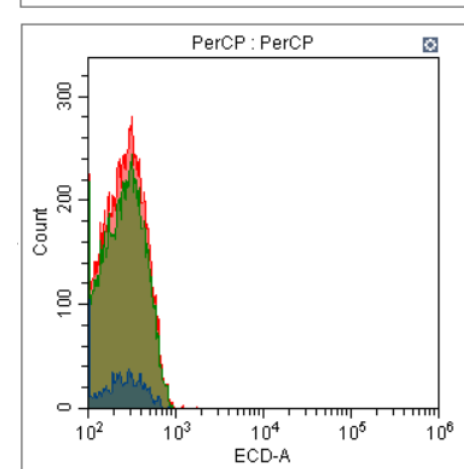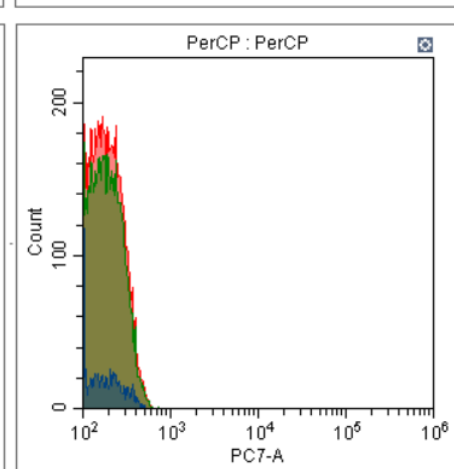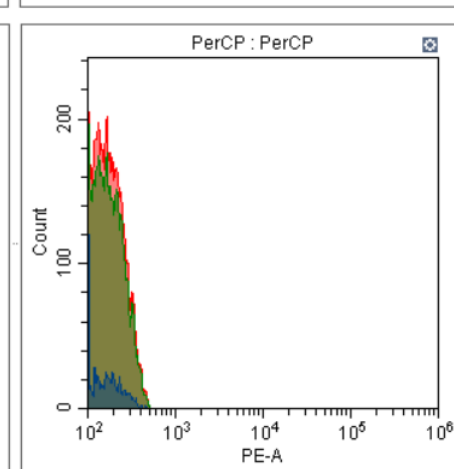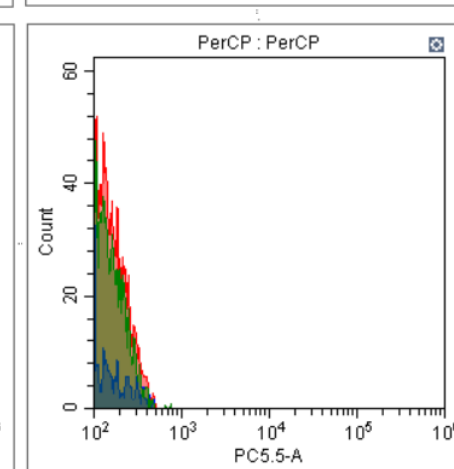

# AAL-APC

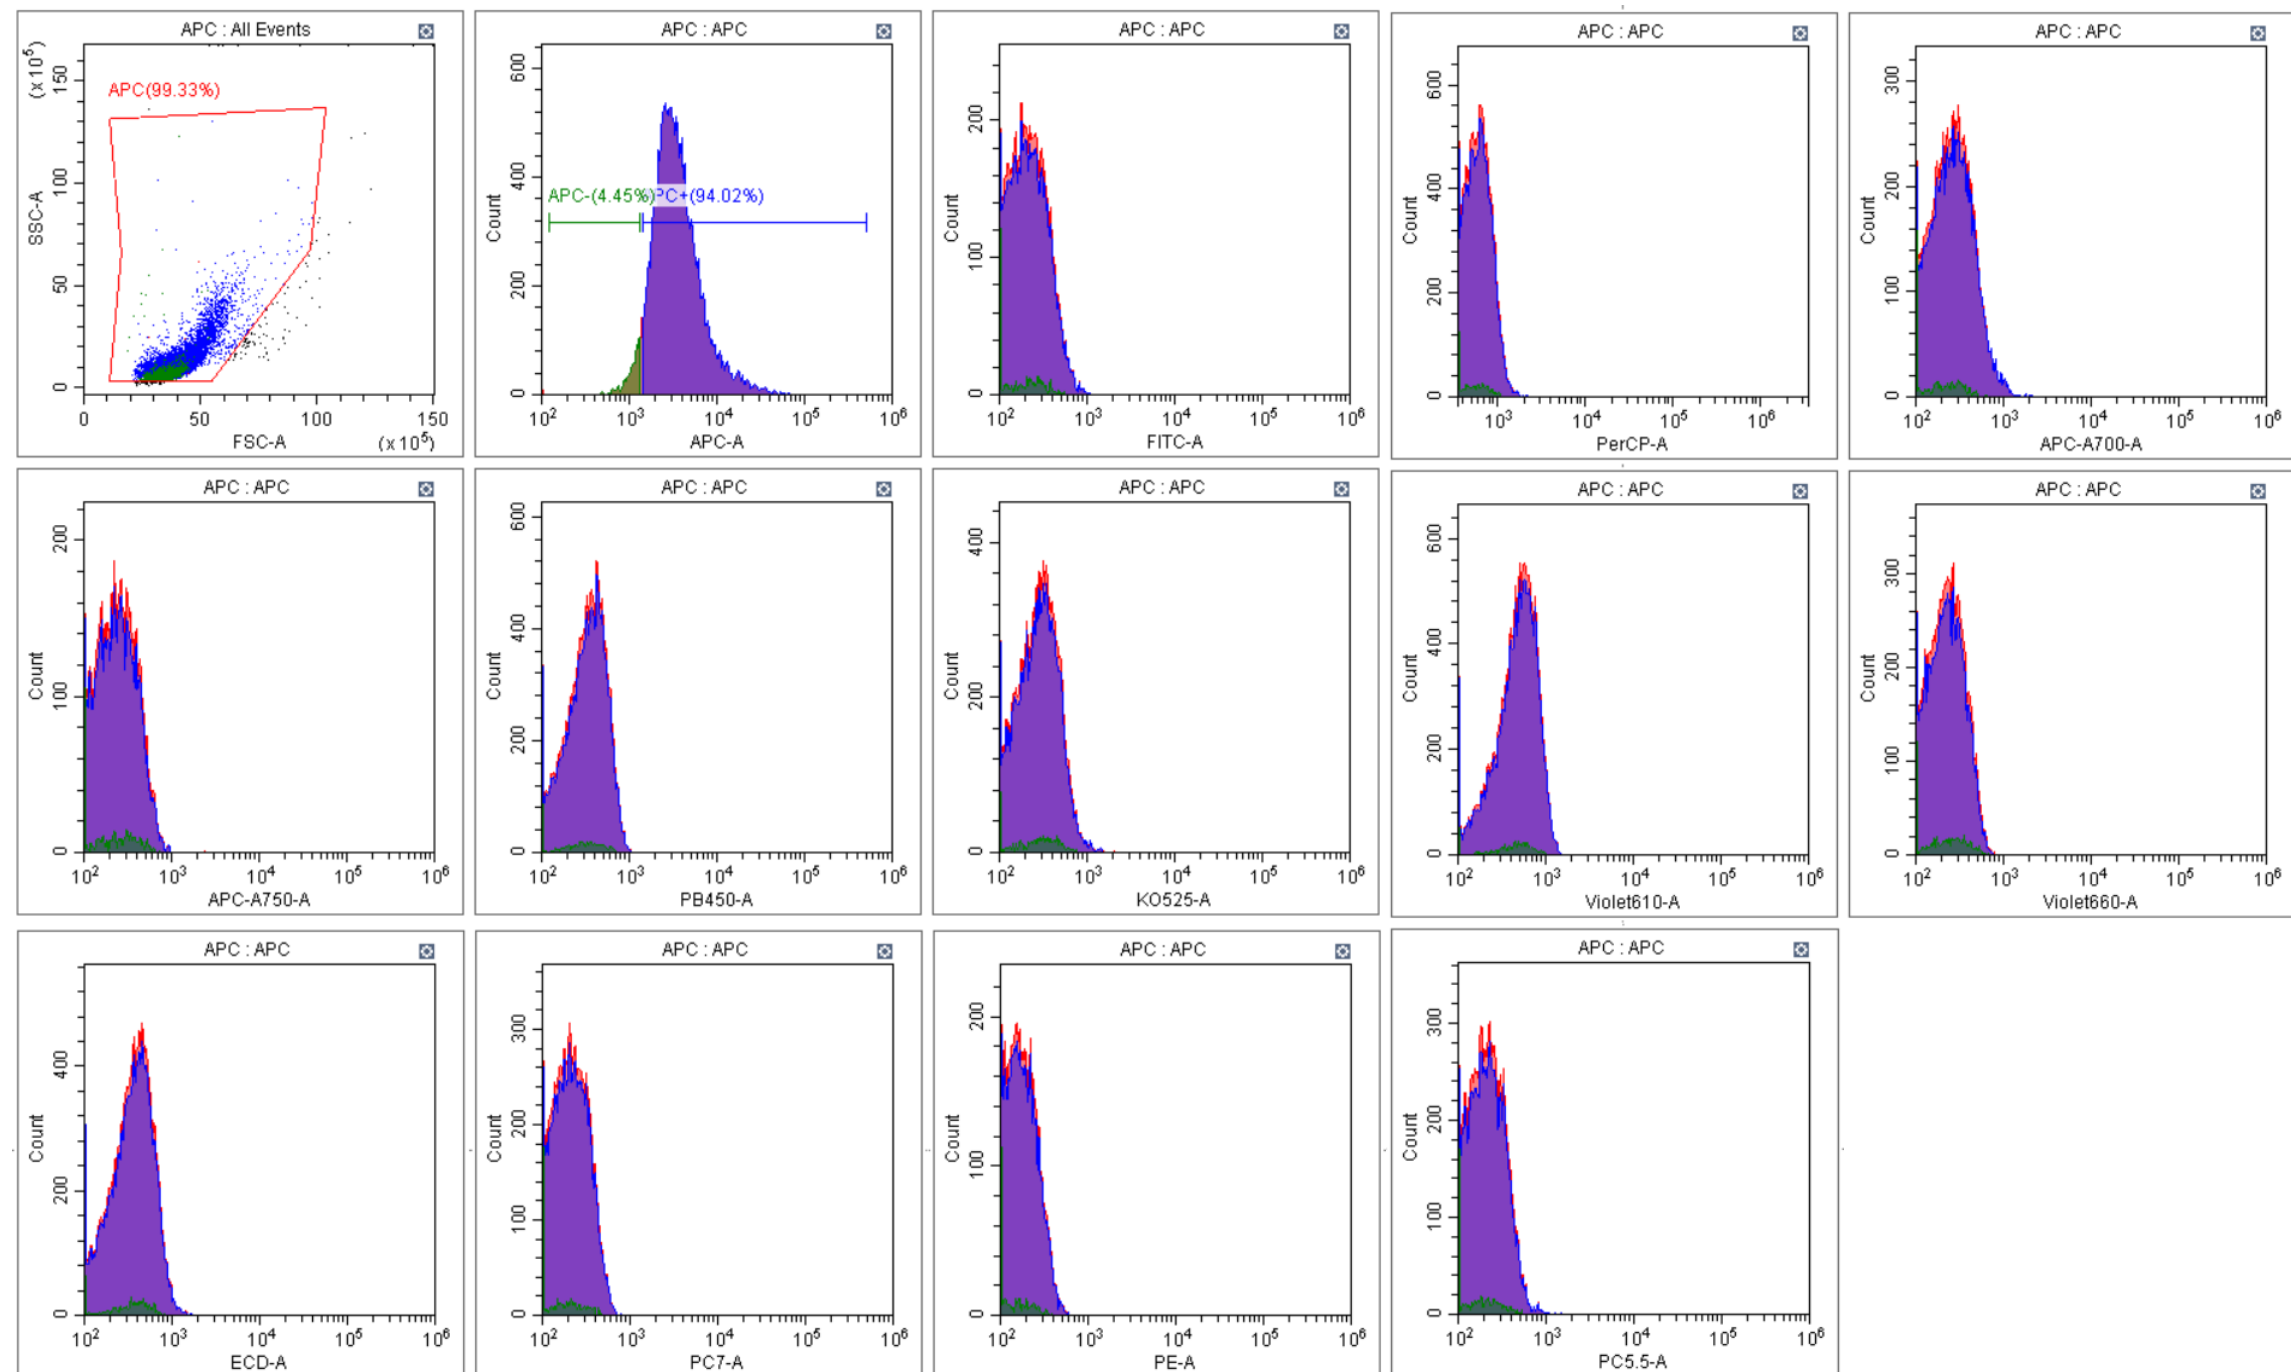

# CD4-AlexaFluor700

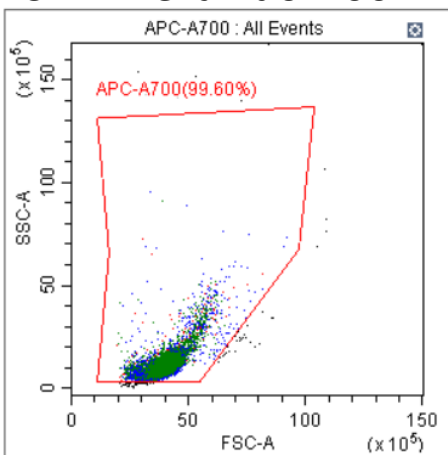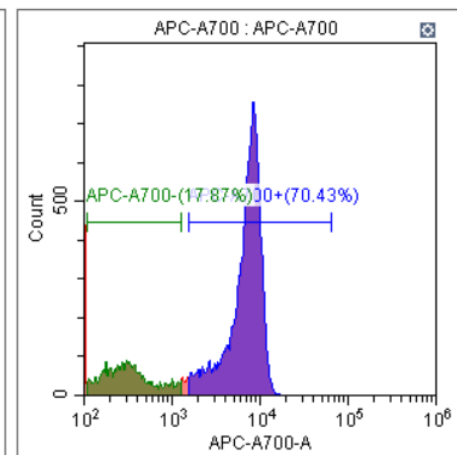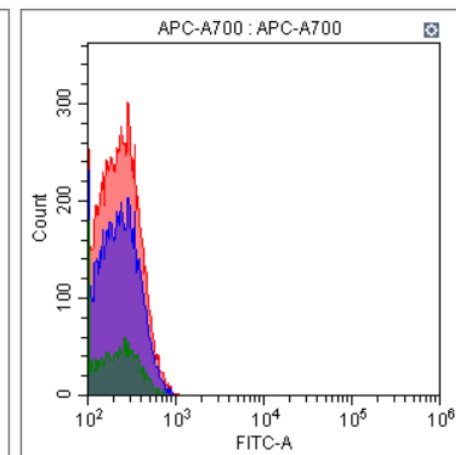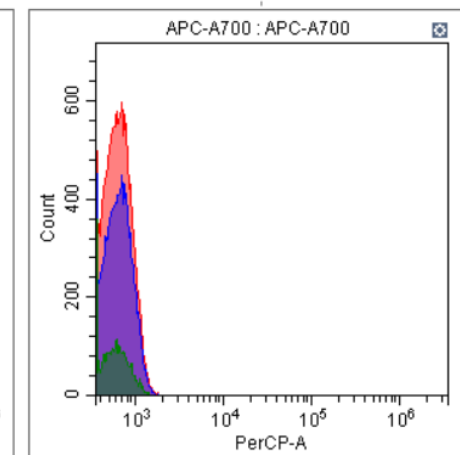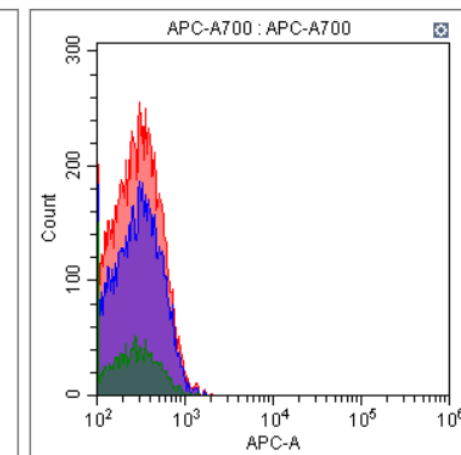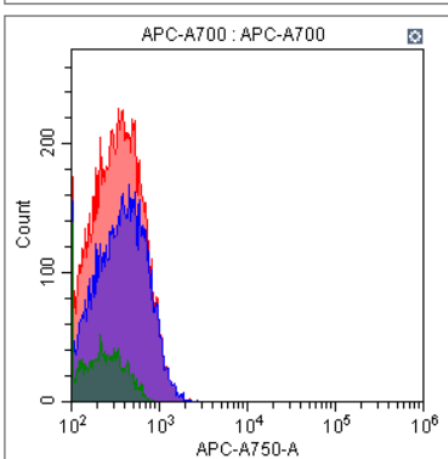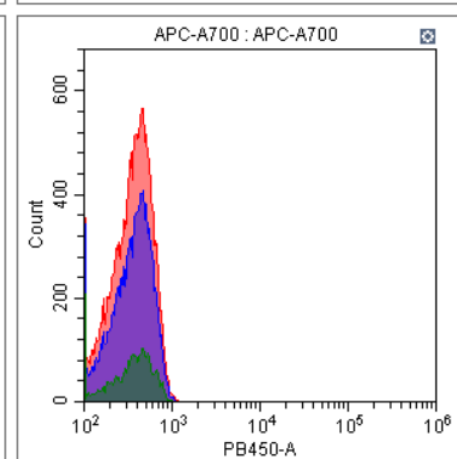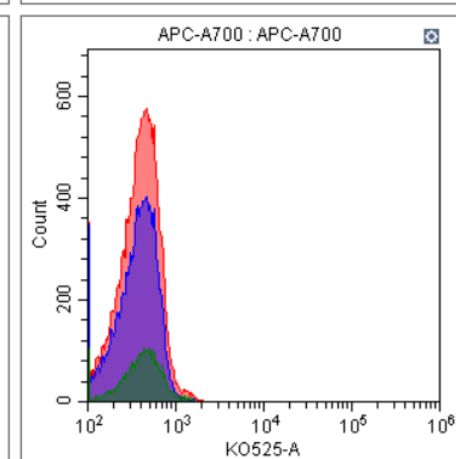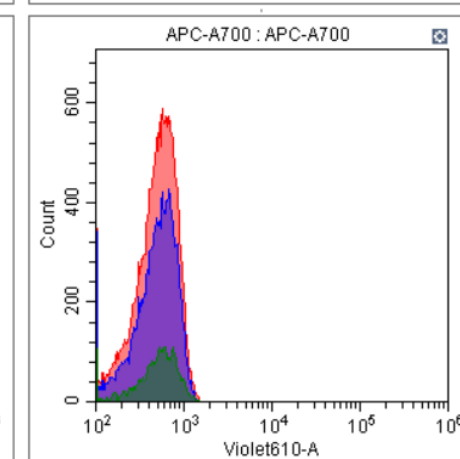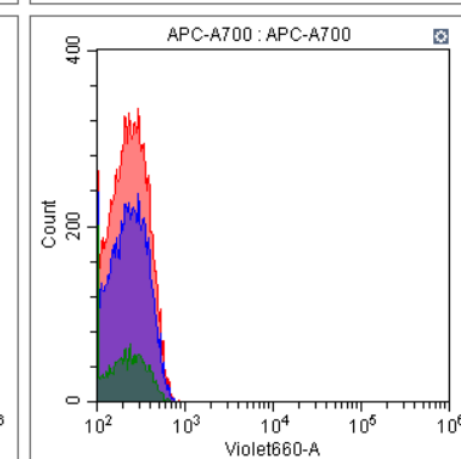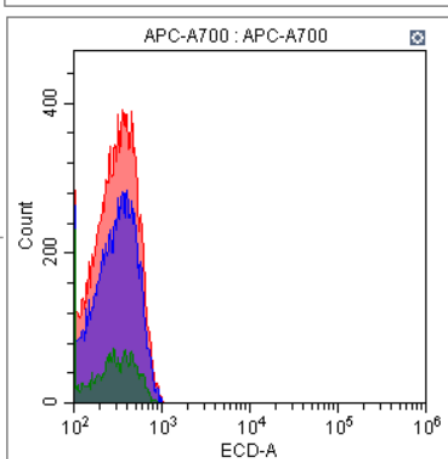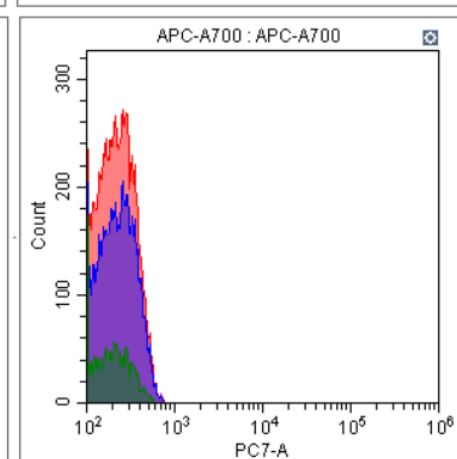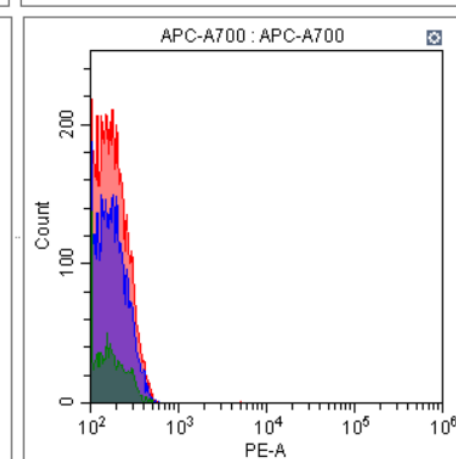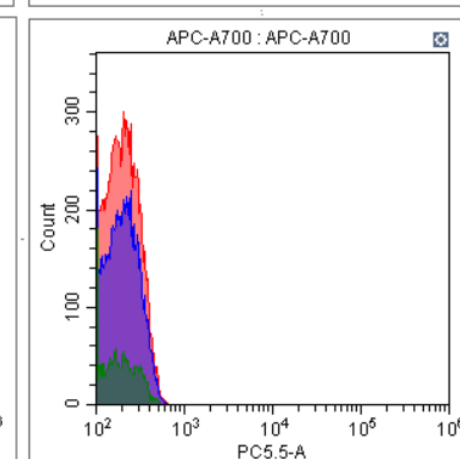

# Gal-3 APC-Cy7

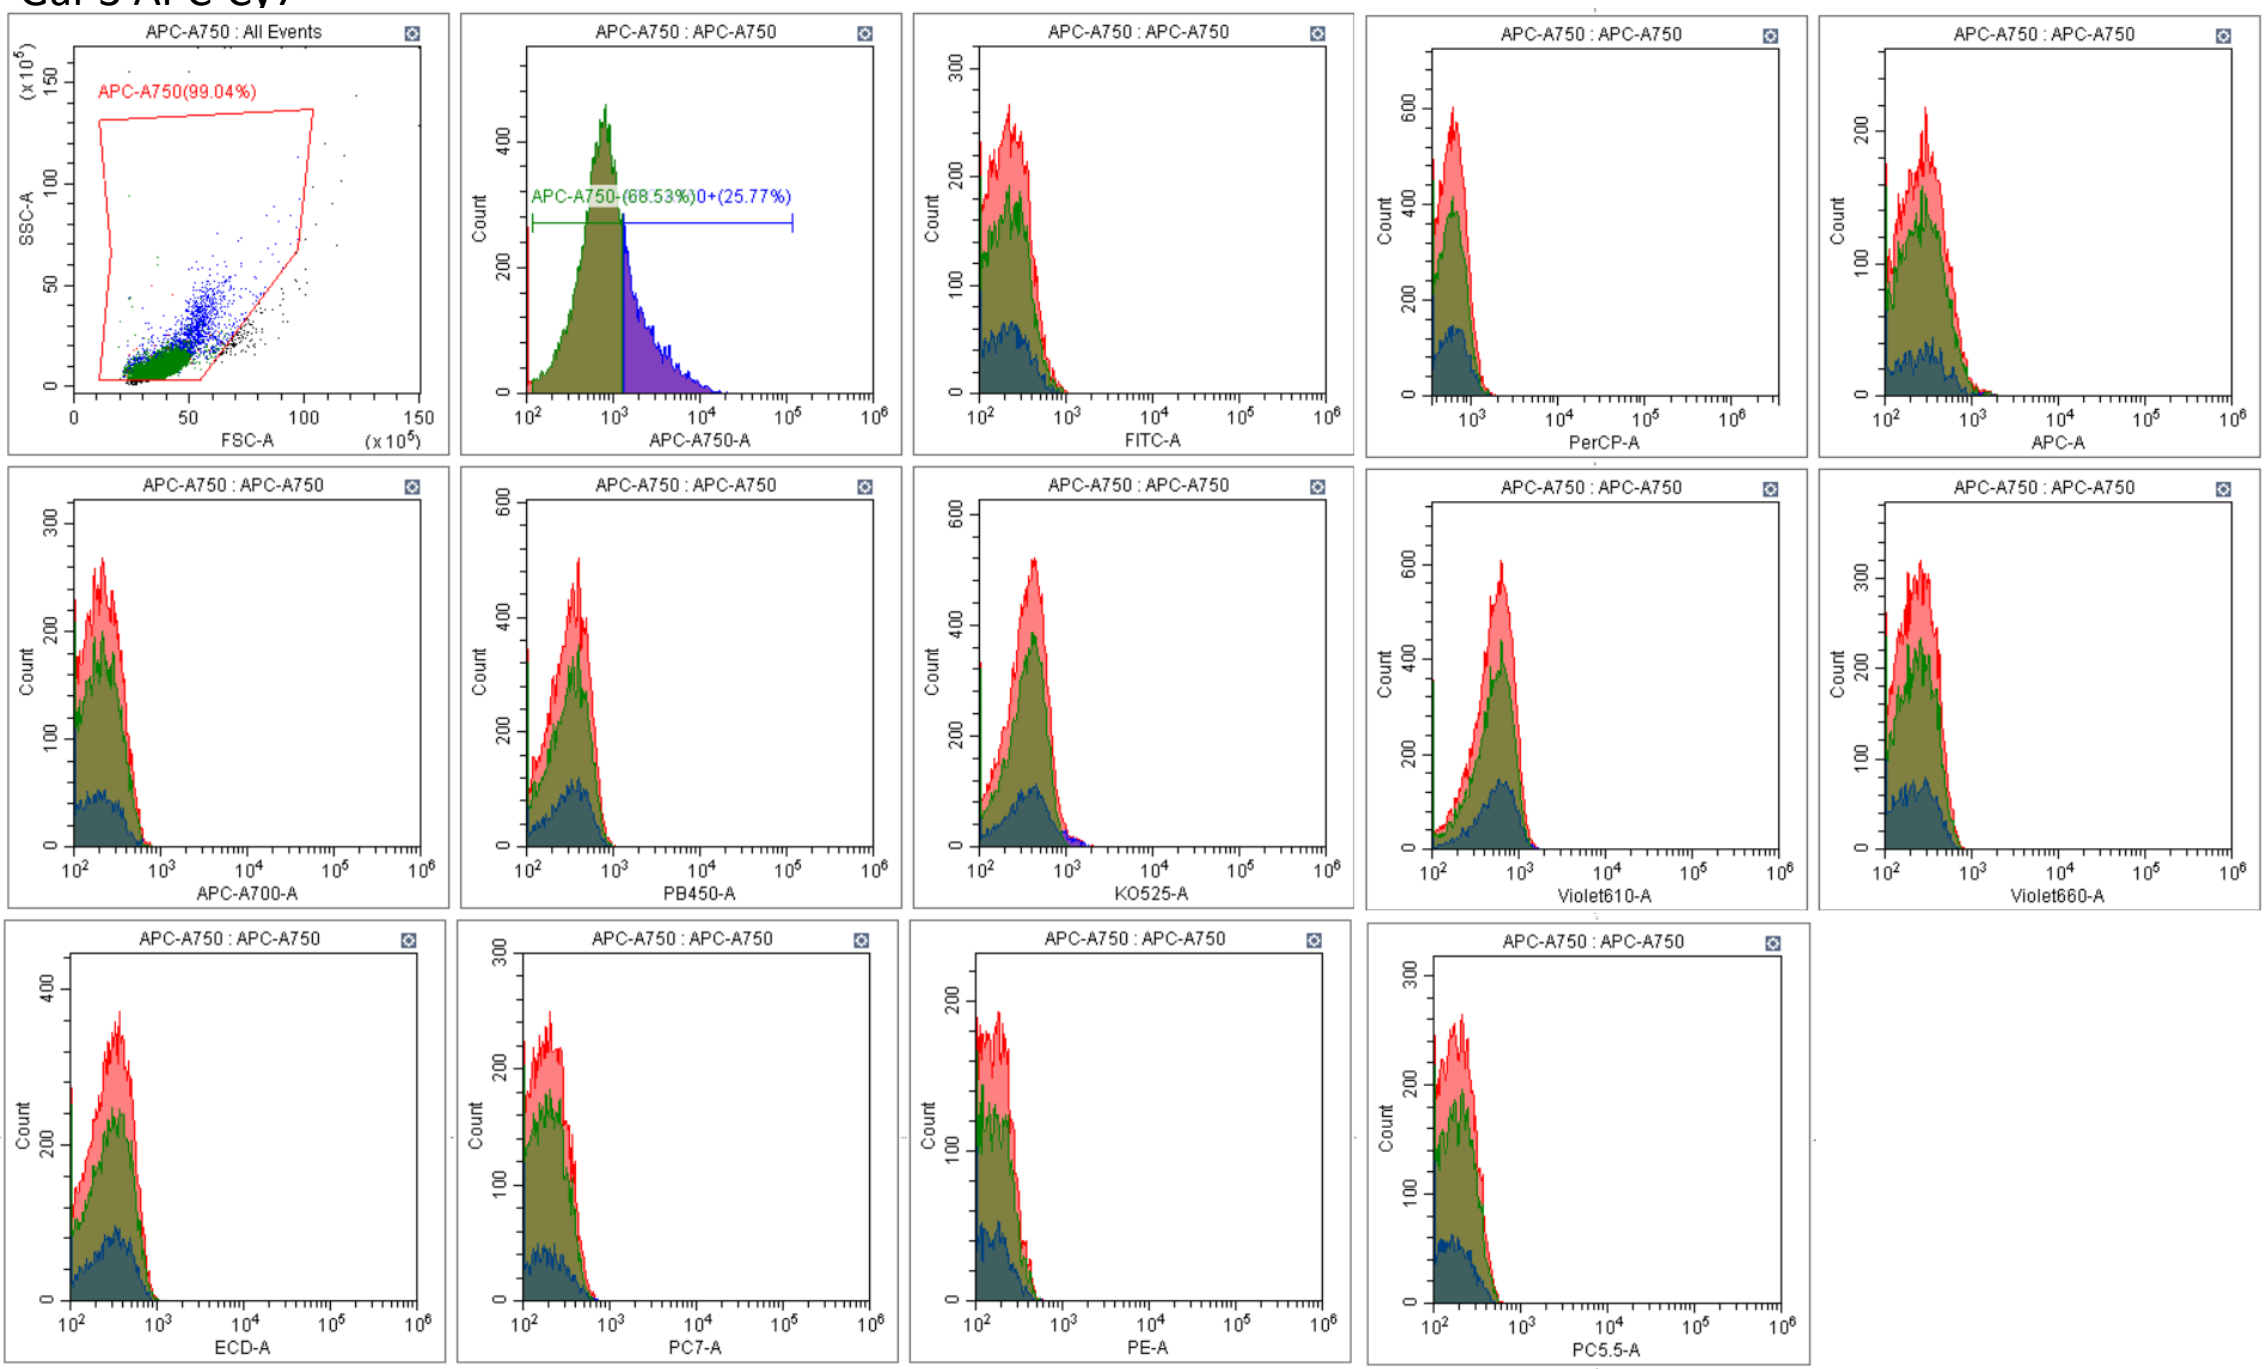

# CD3-eFluor450

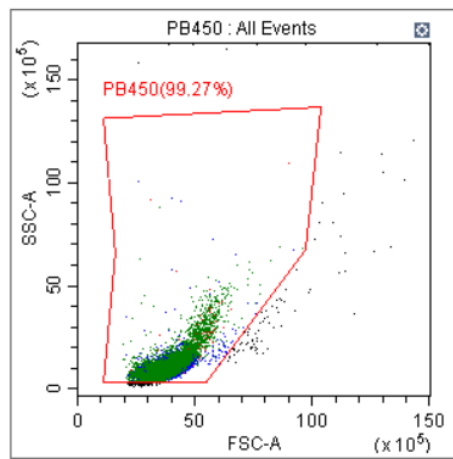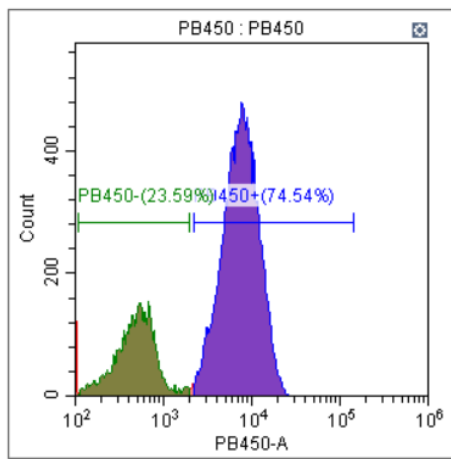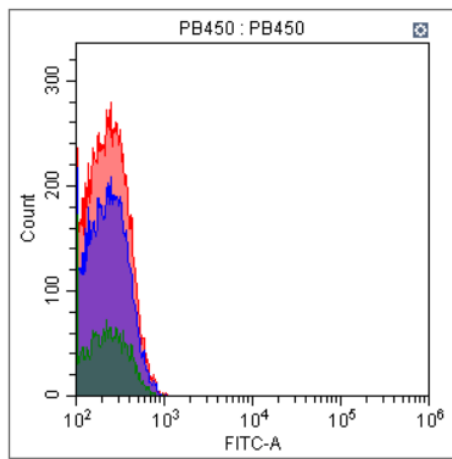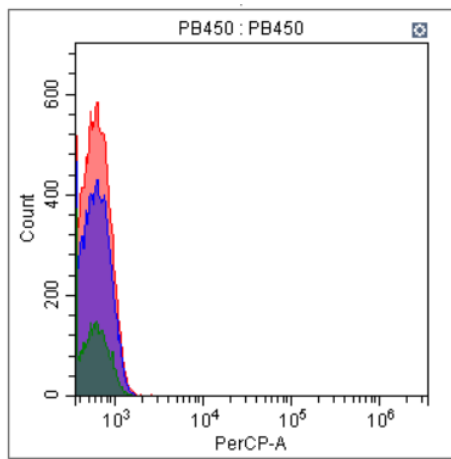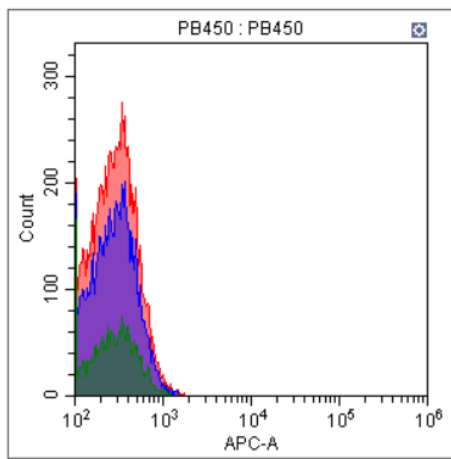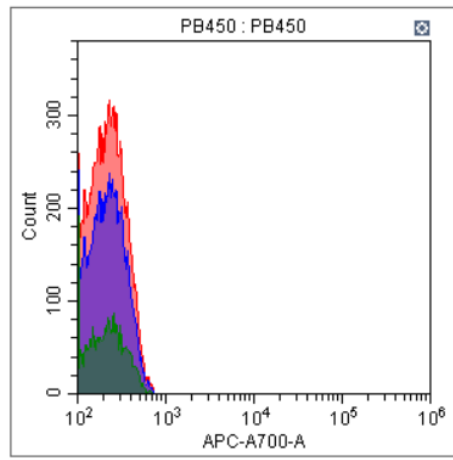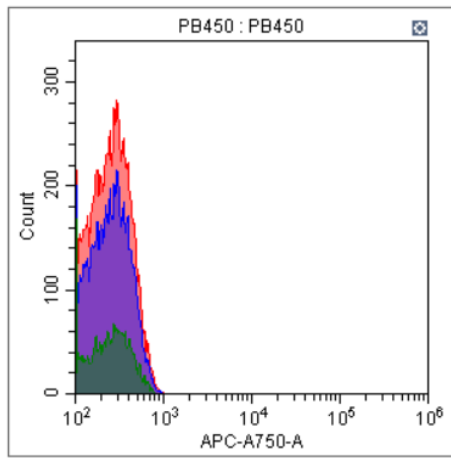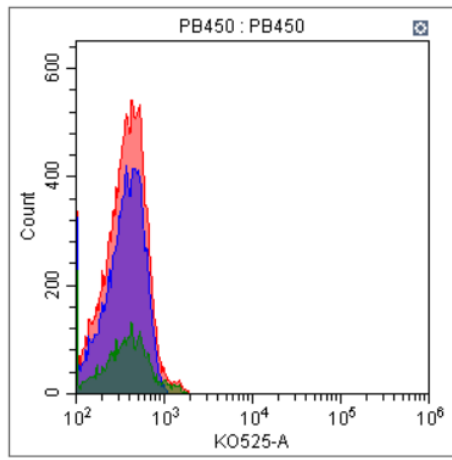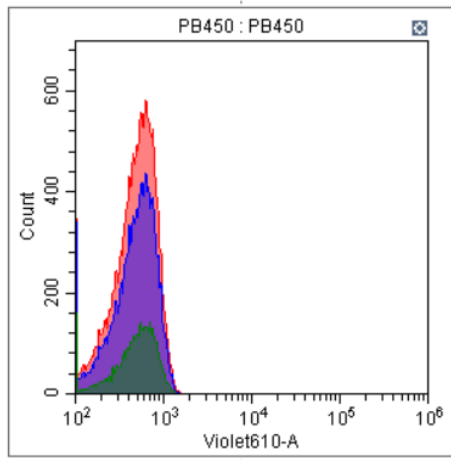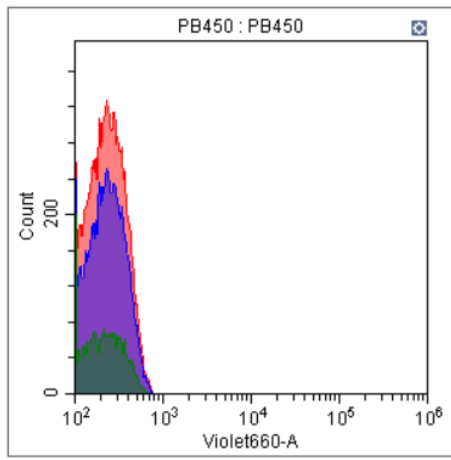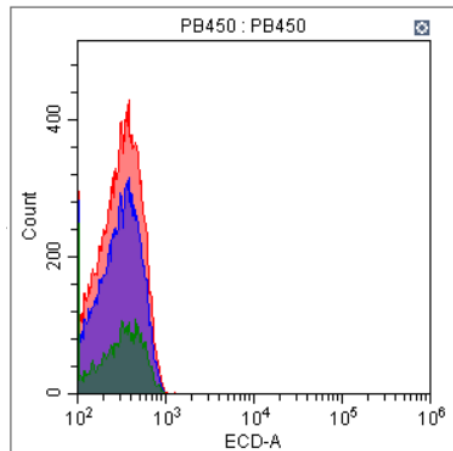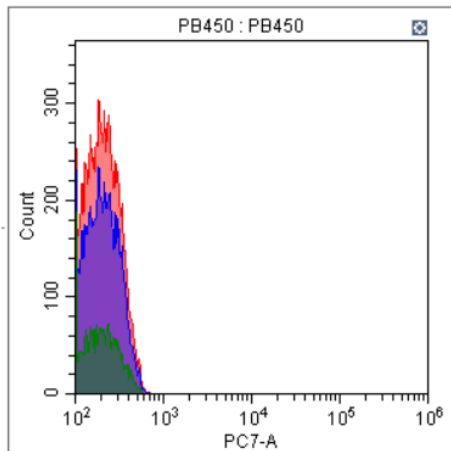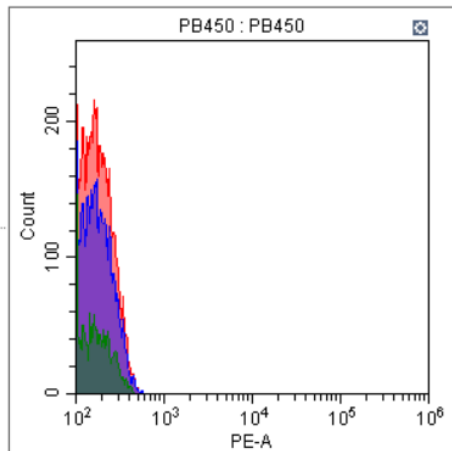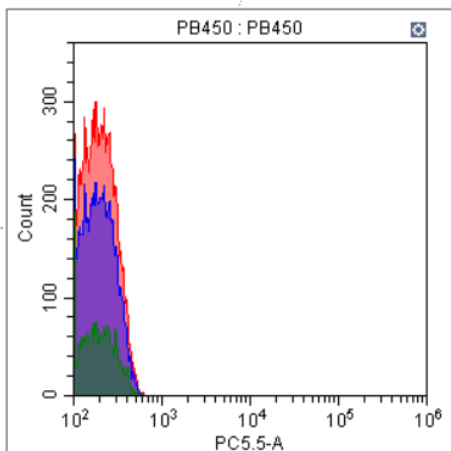



# Viability 405/520

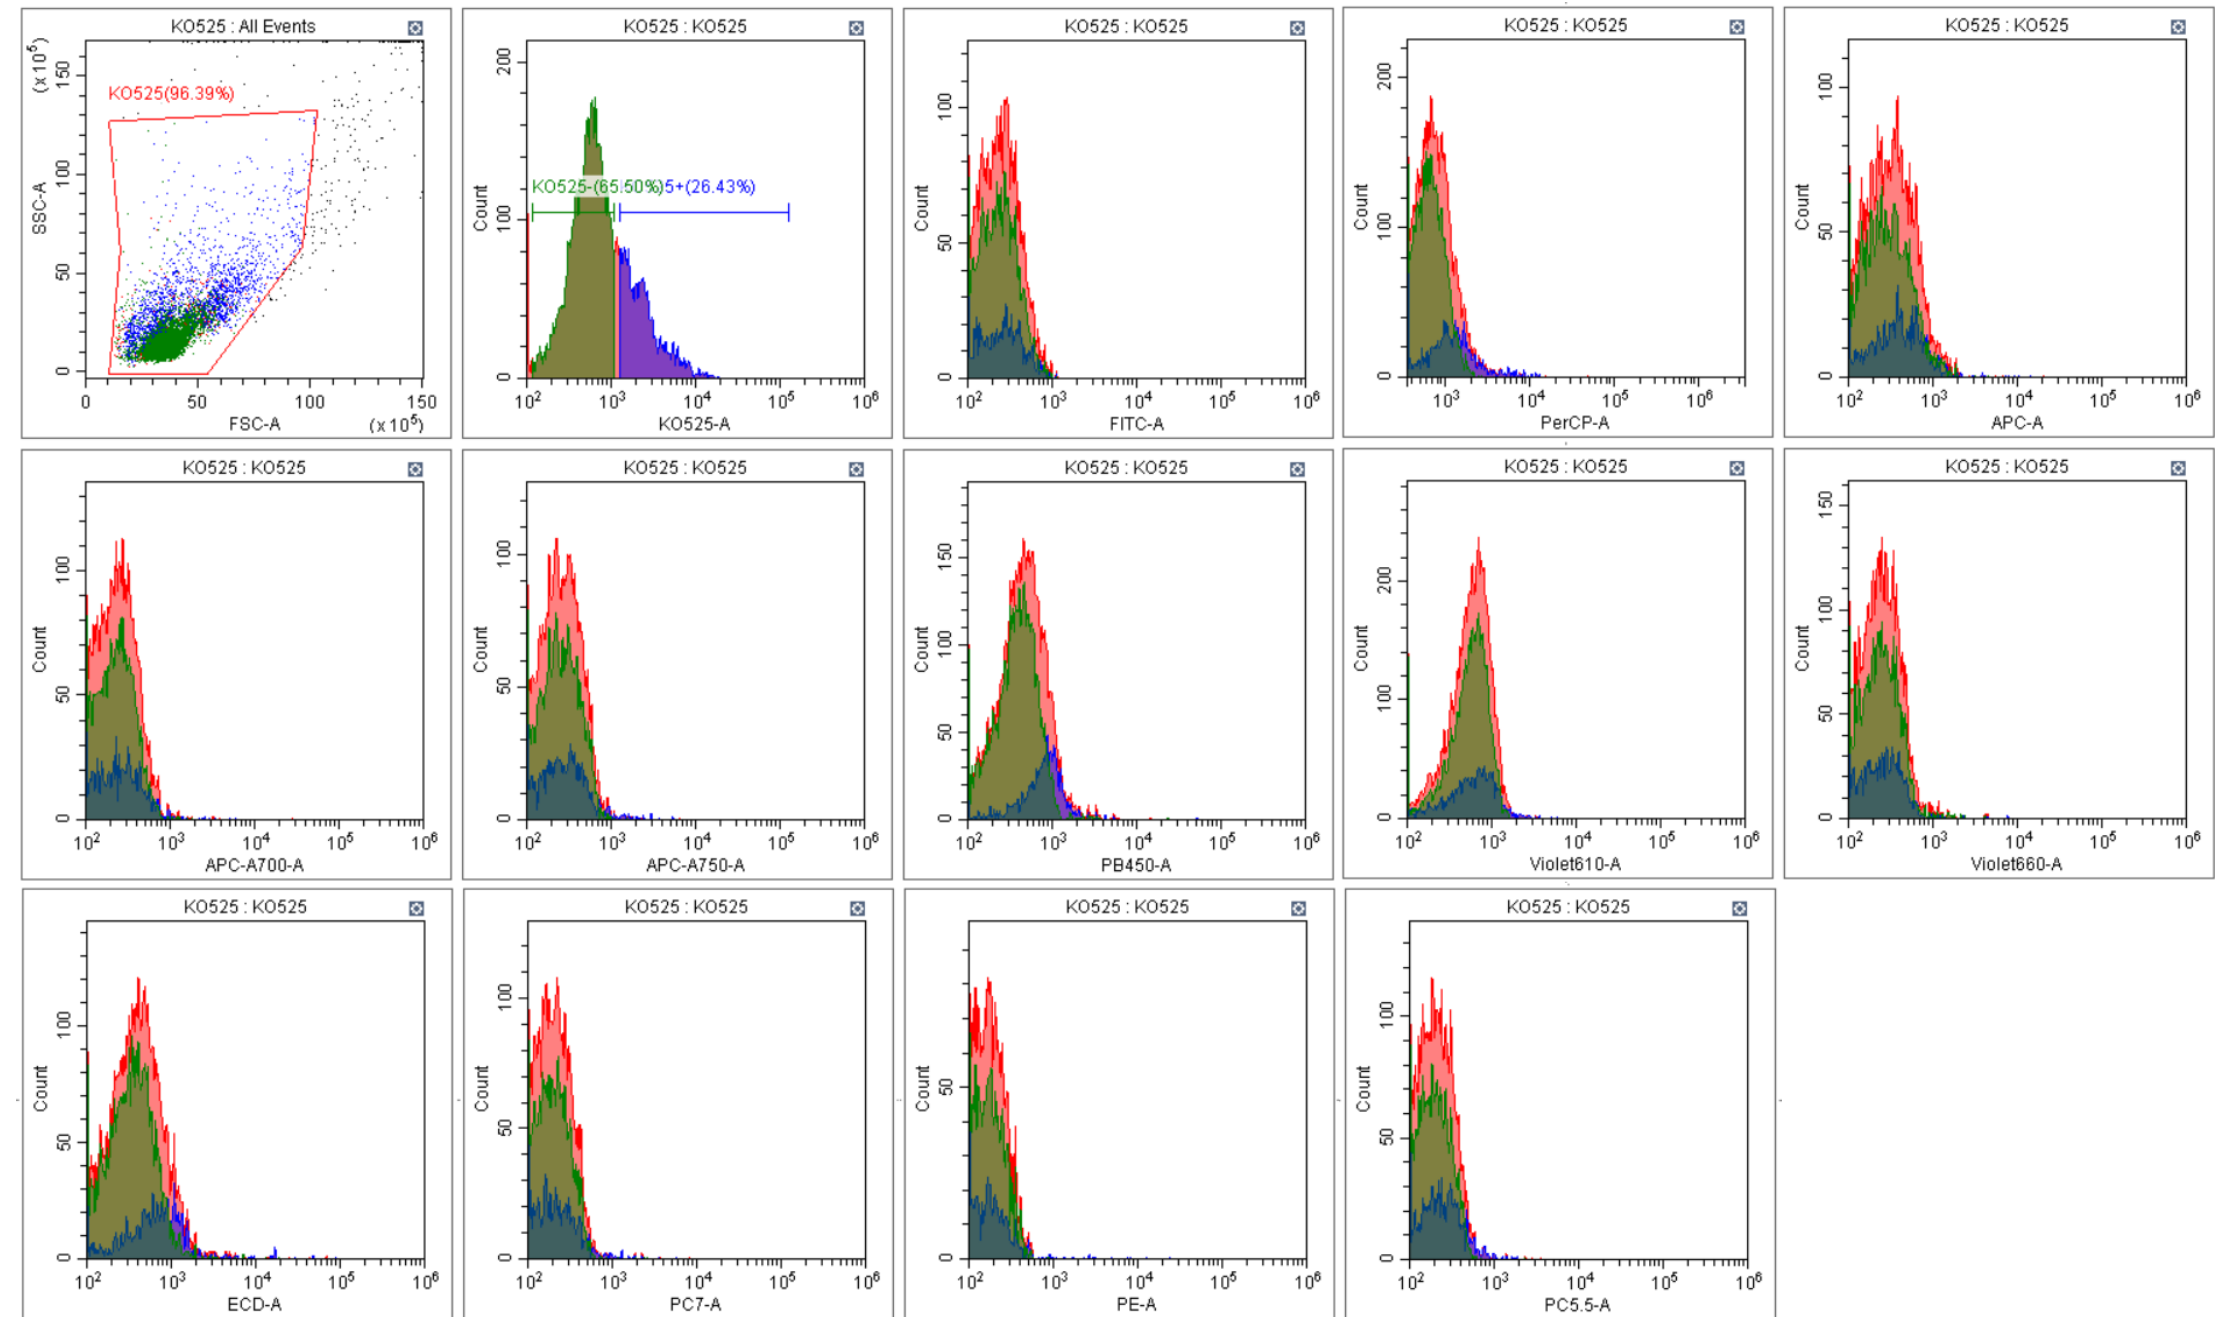

# CD56-Brilliant Violet 605

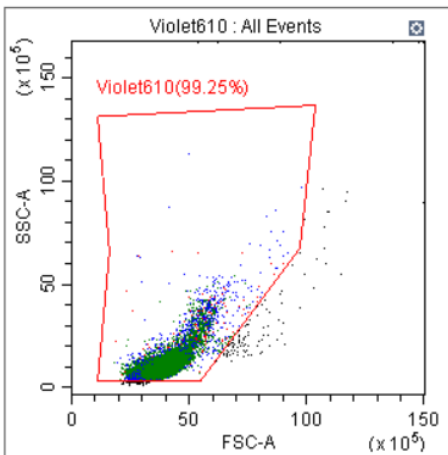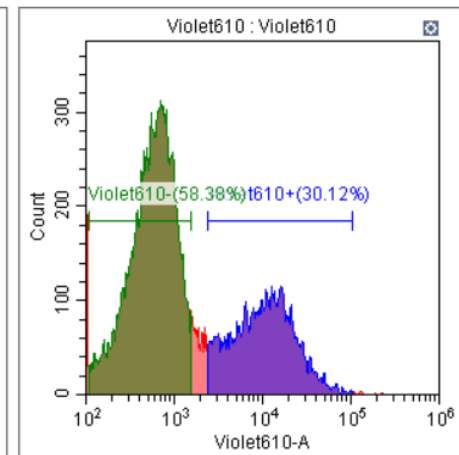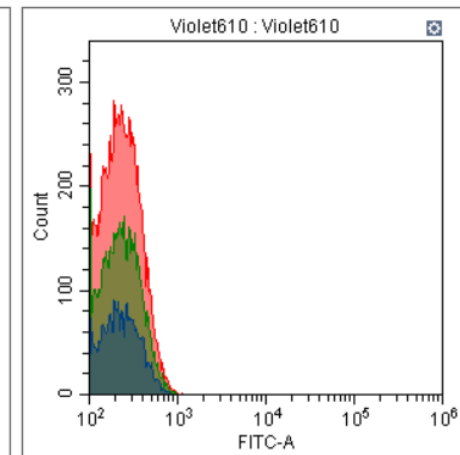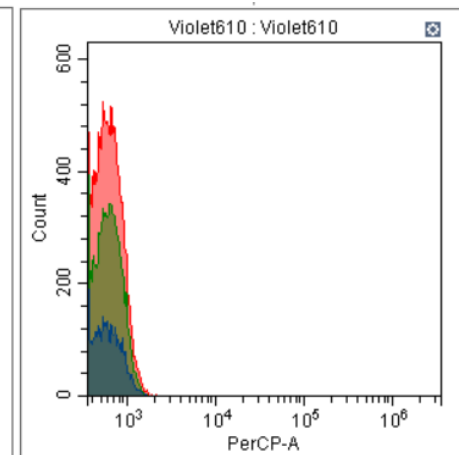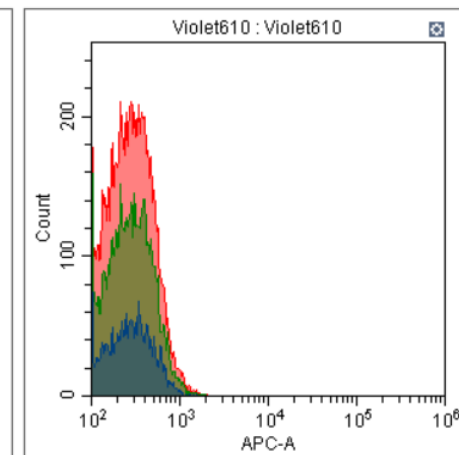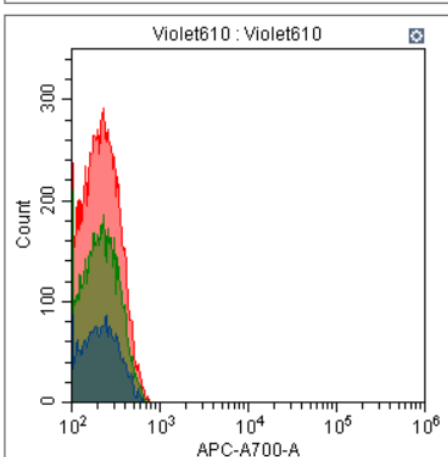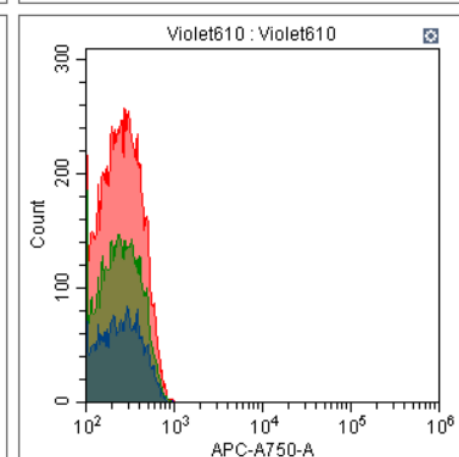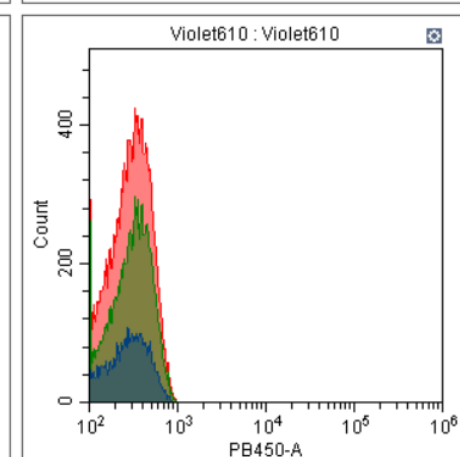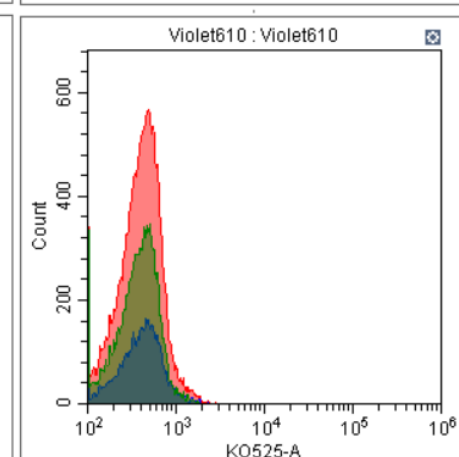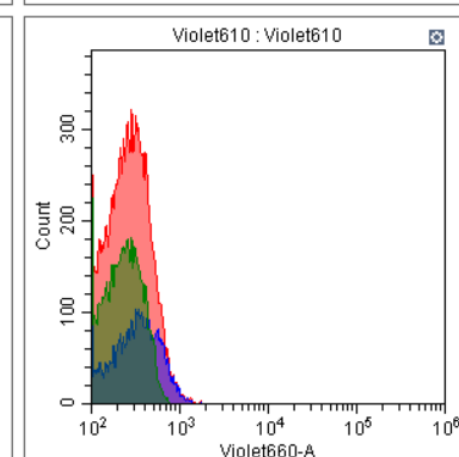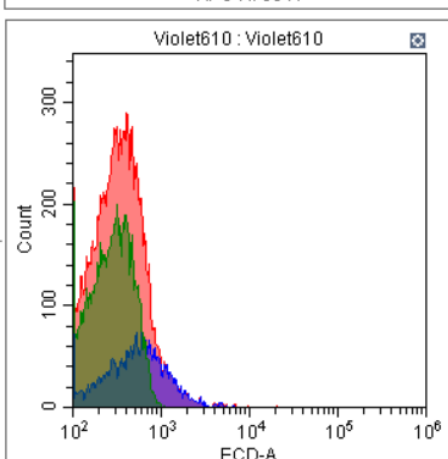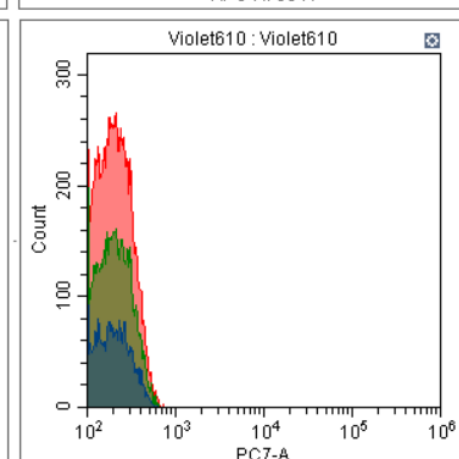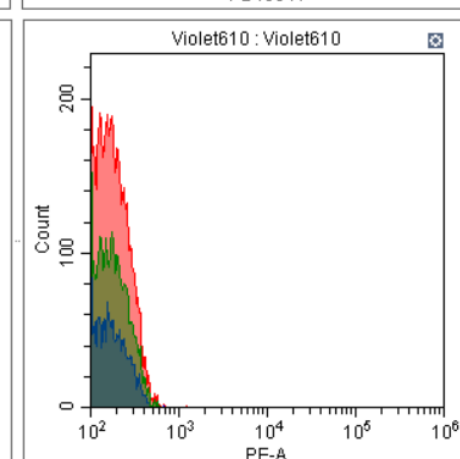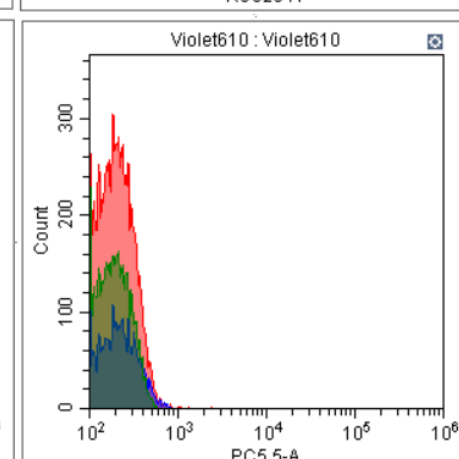

# CD25-Super Bright 645

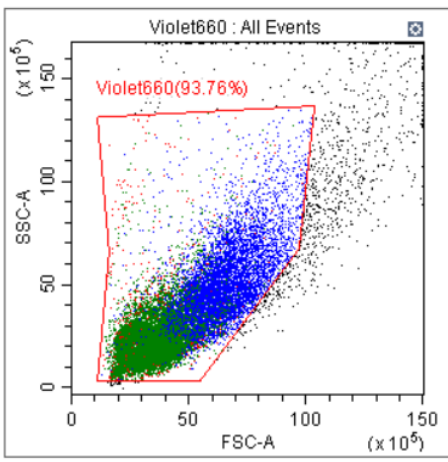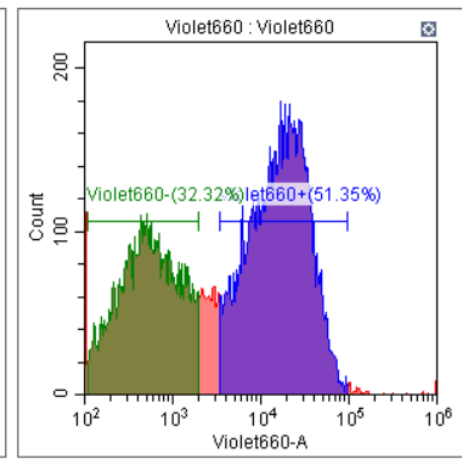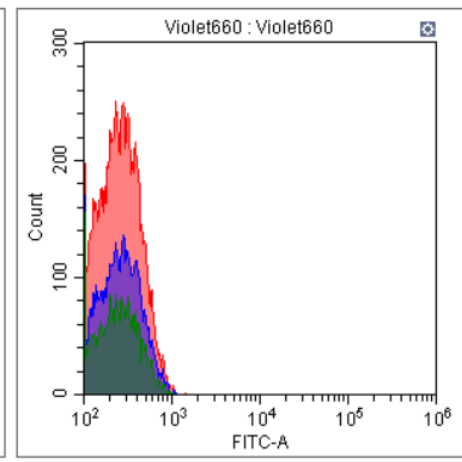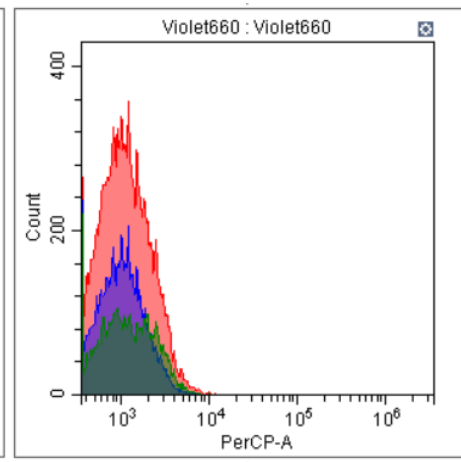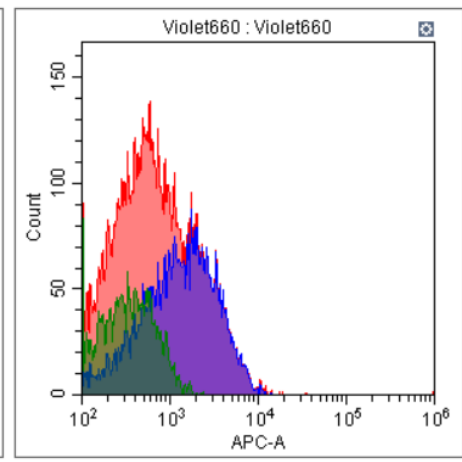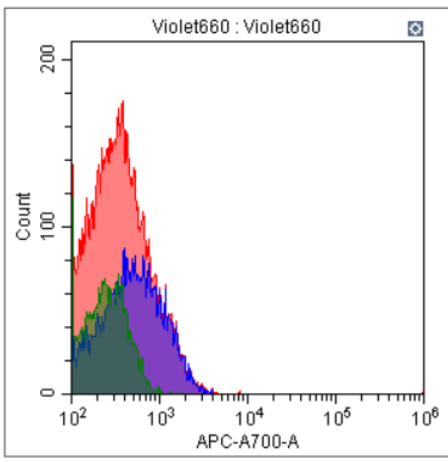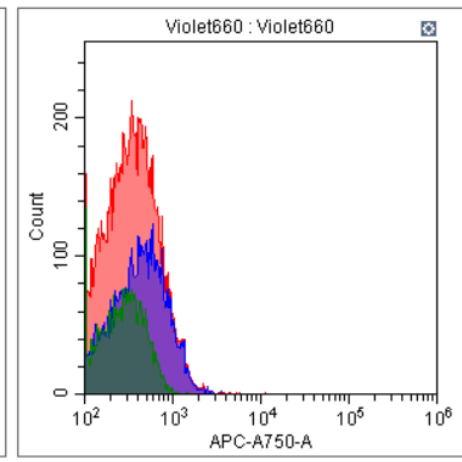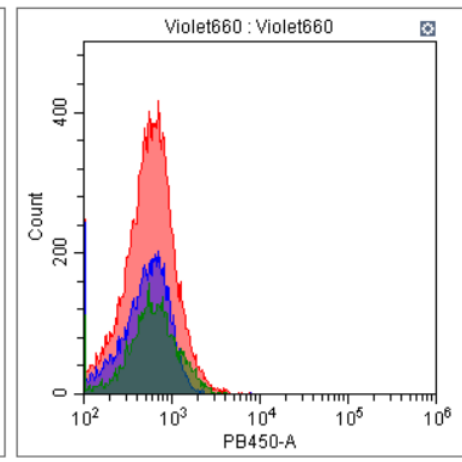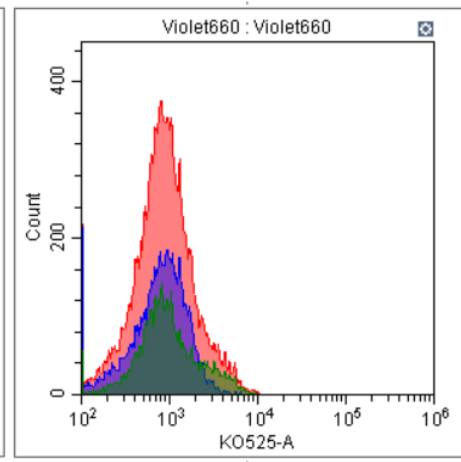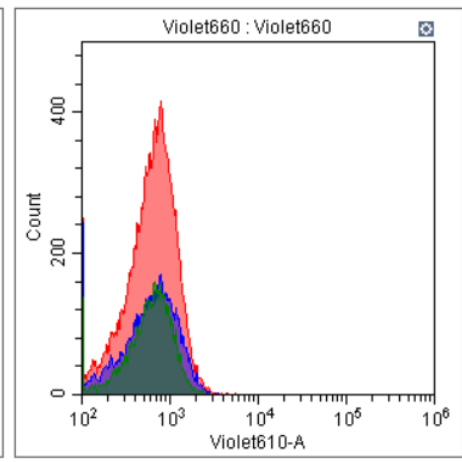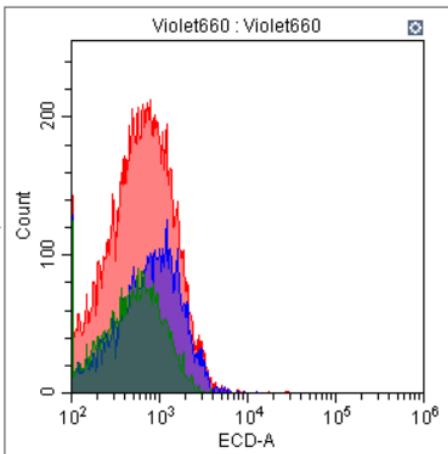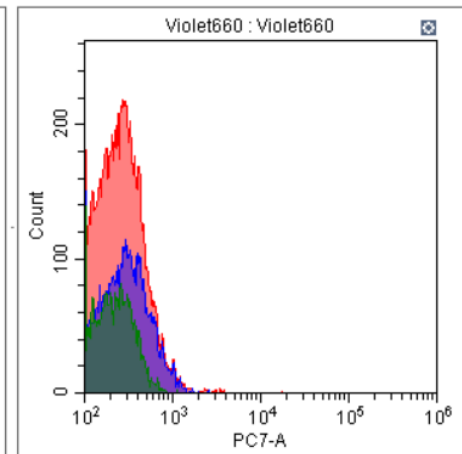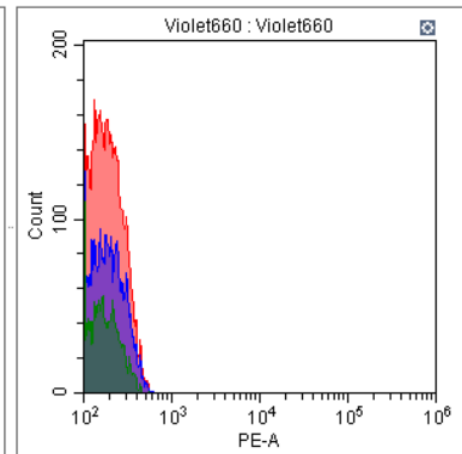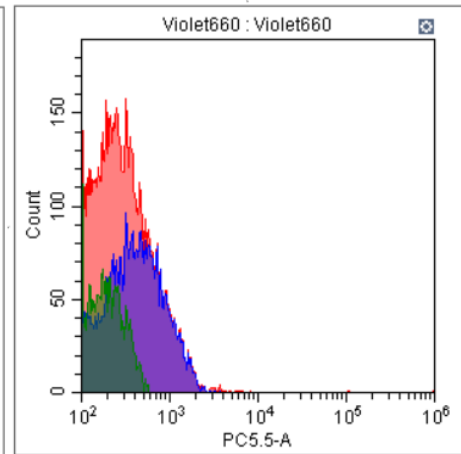

# Siglec-1 PE-Texas Red

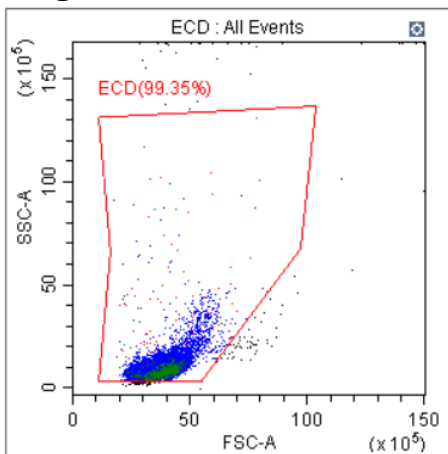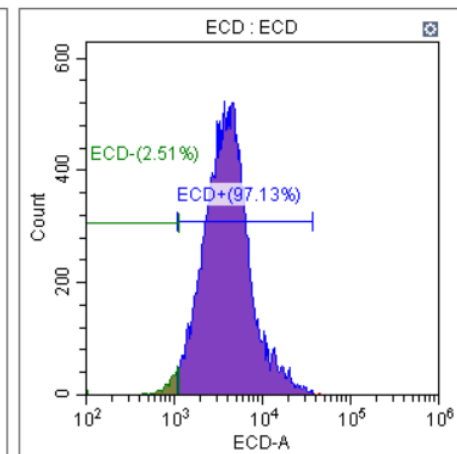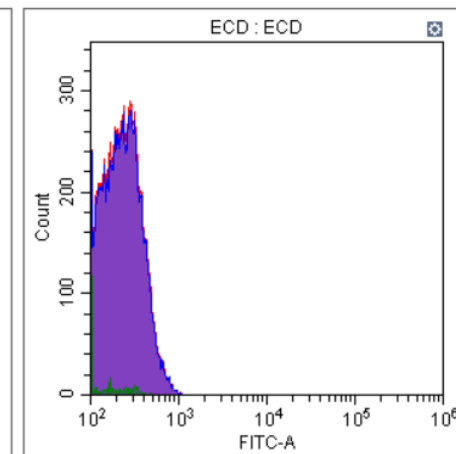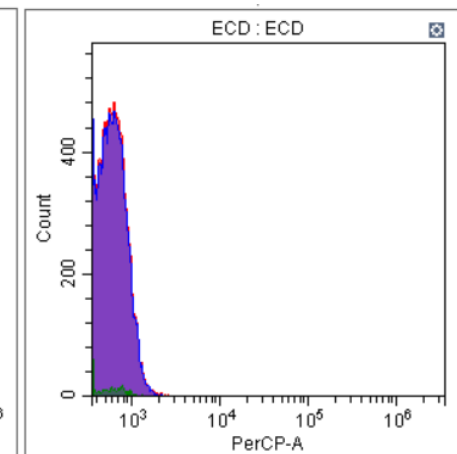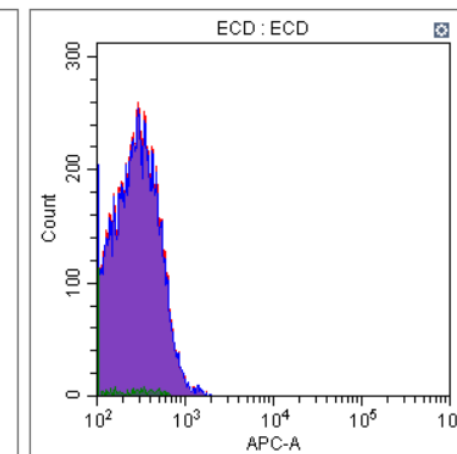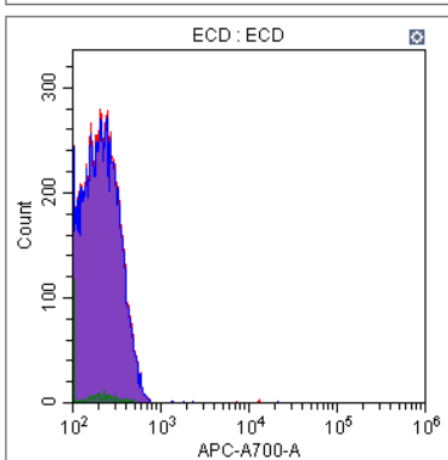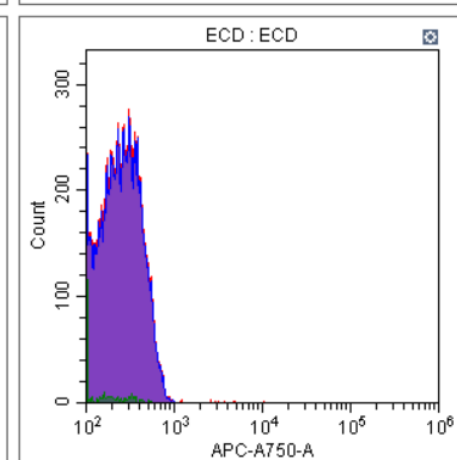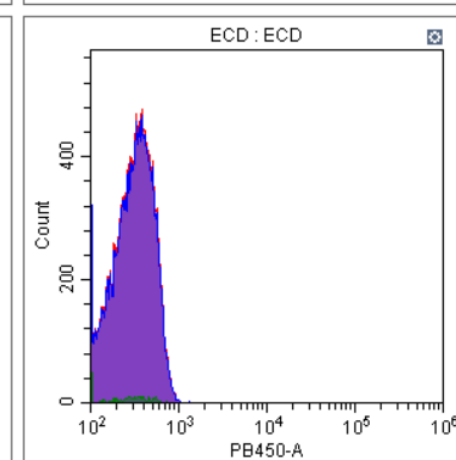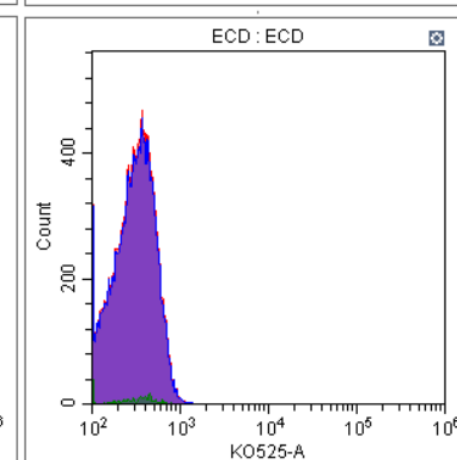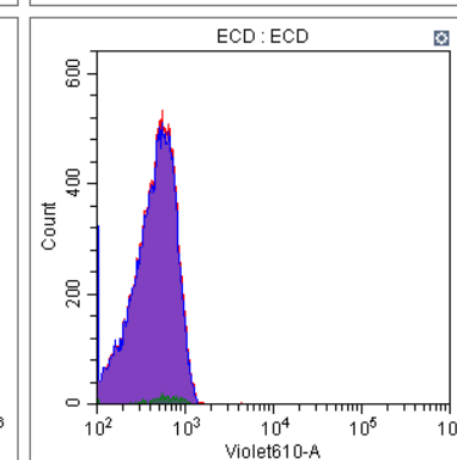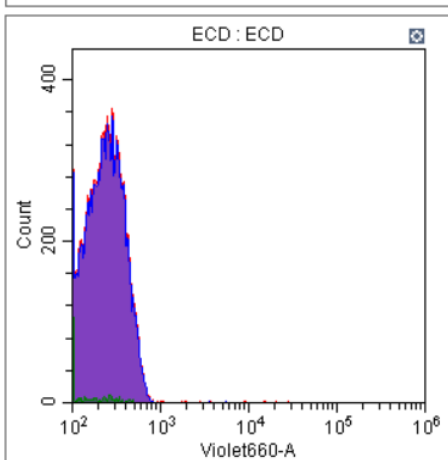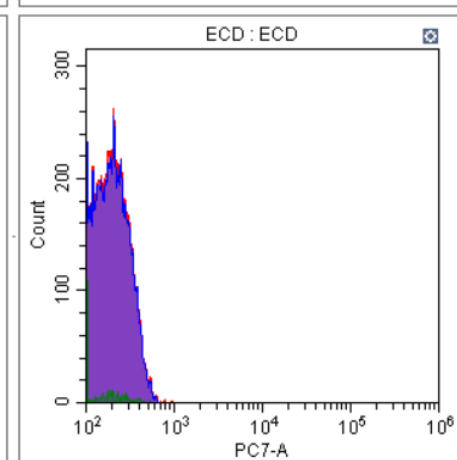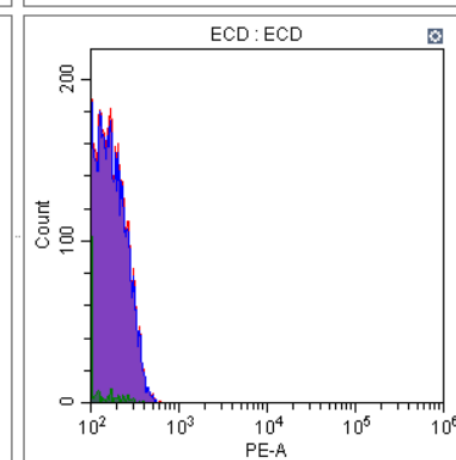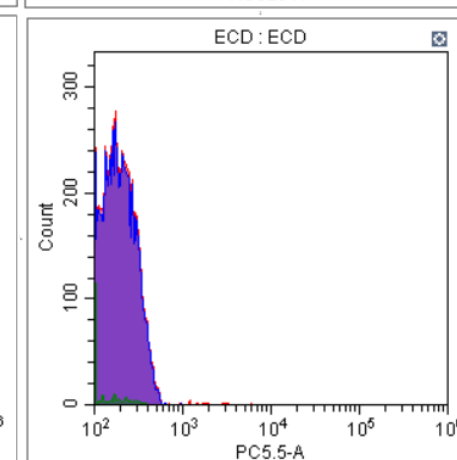

# Gal-1 PE-Cy7

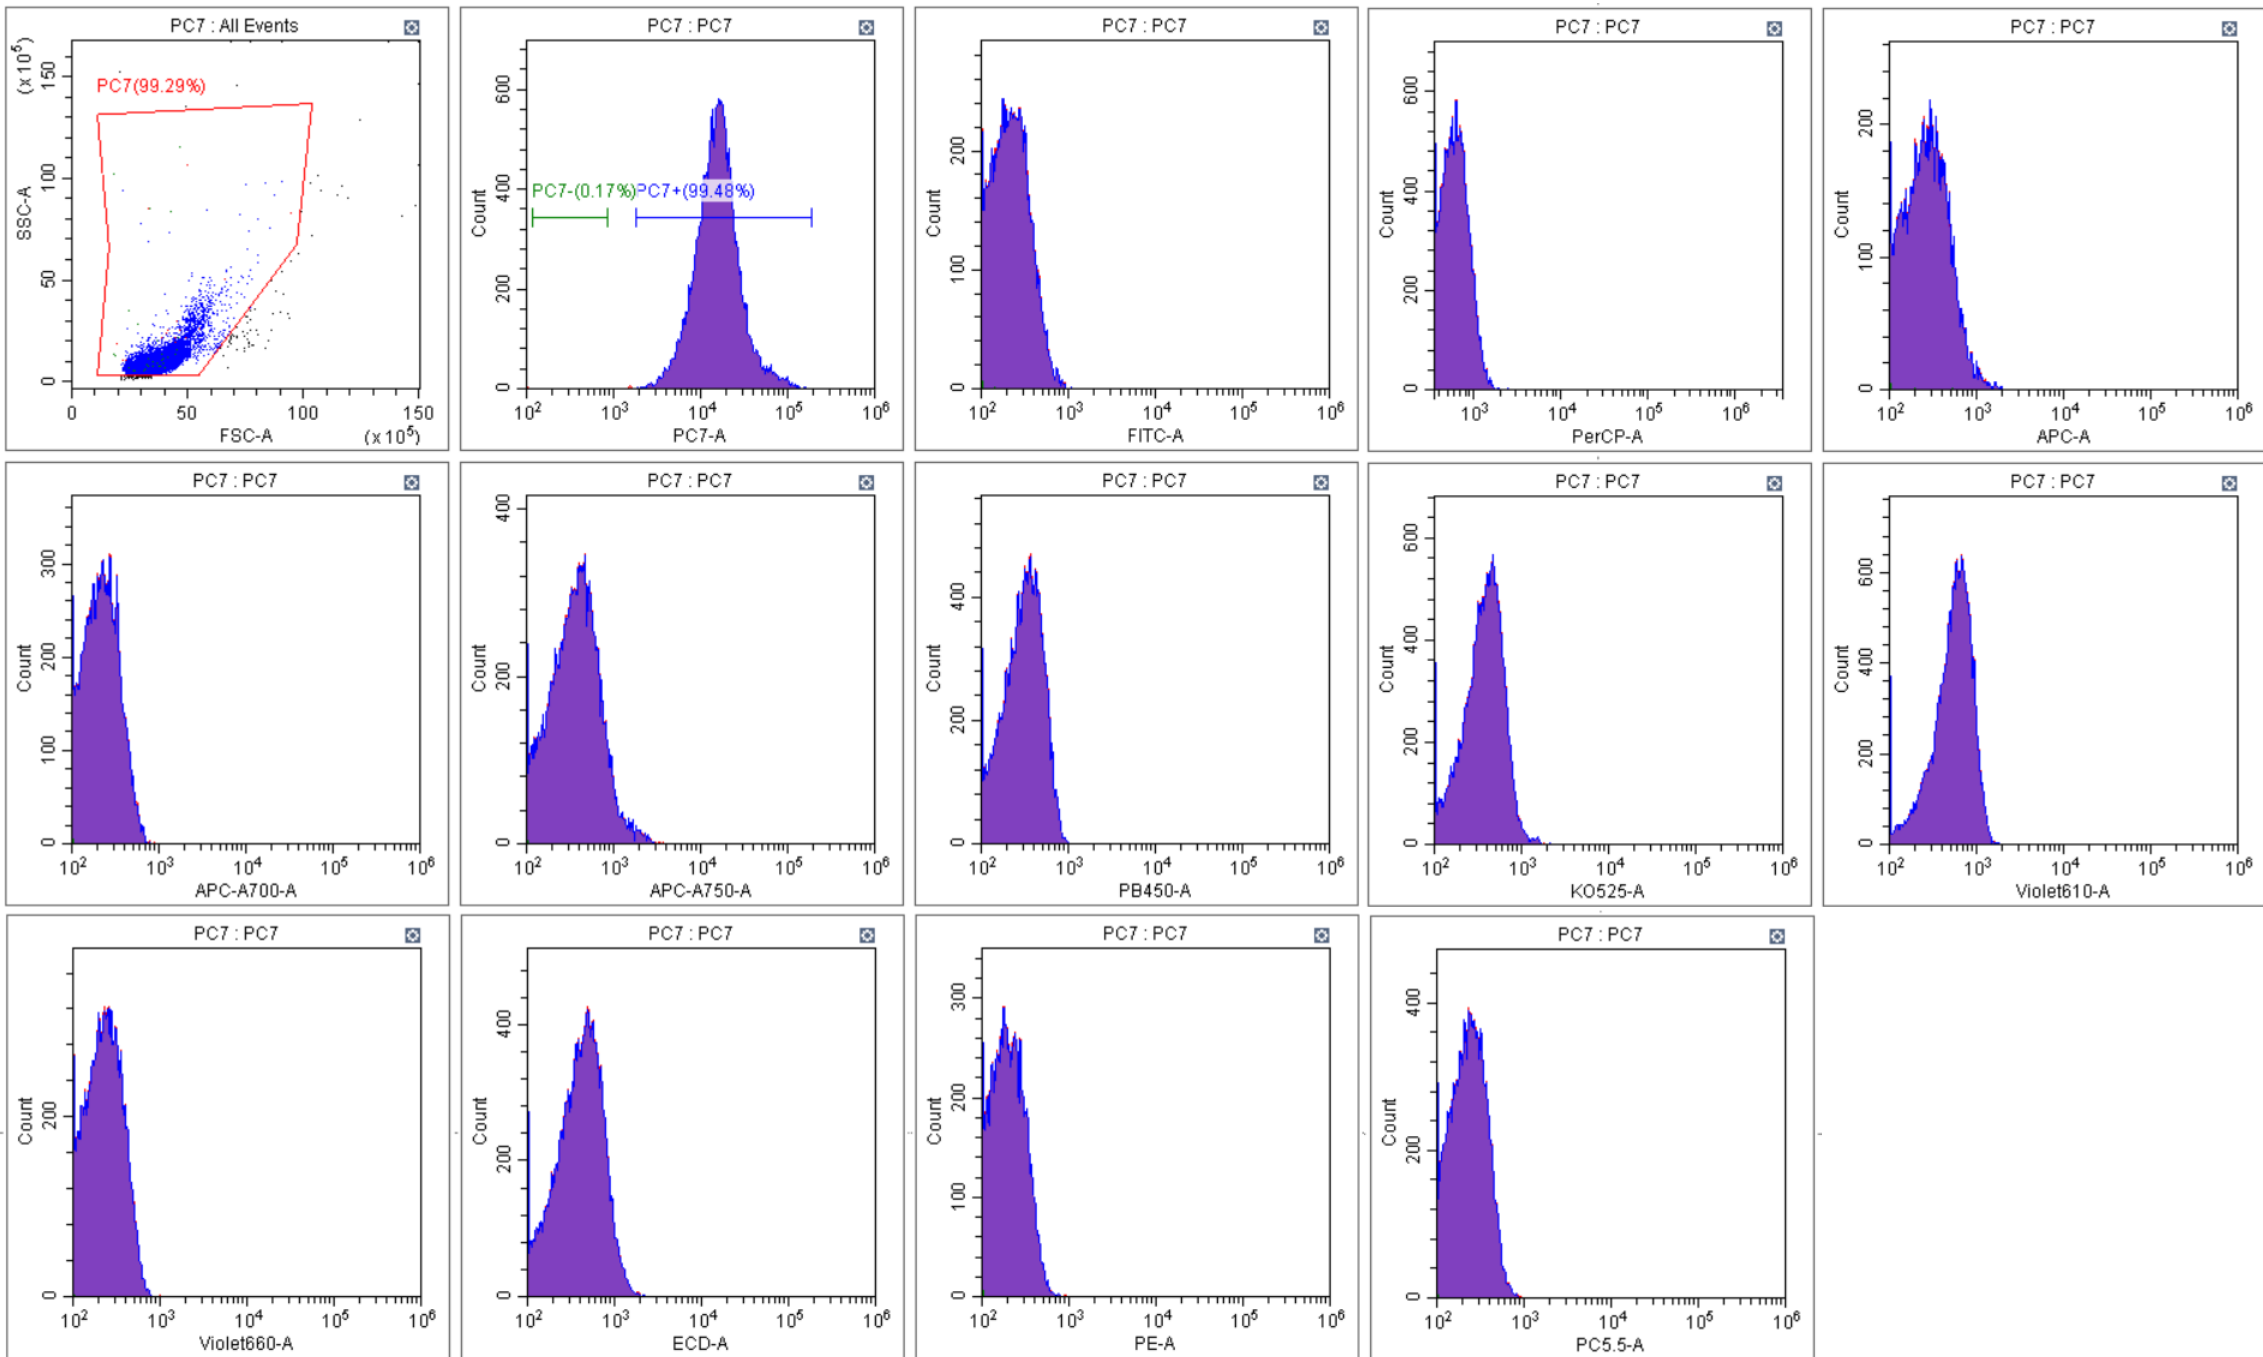

Compensation  
of  
B-cell/monocyte panel

# Unstained sample

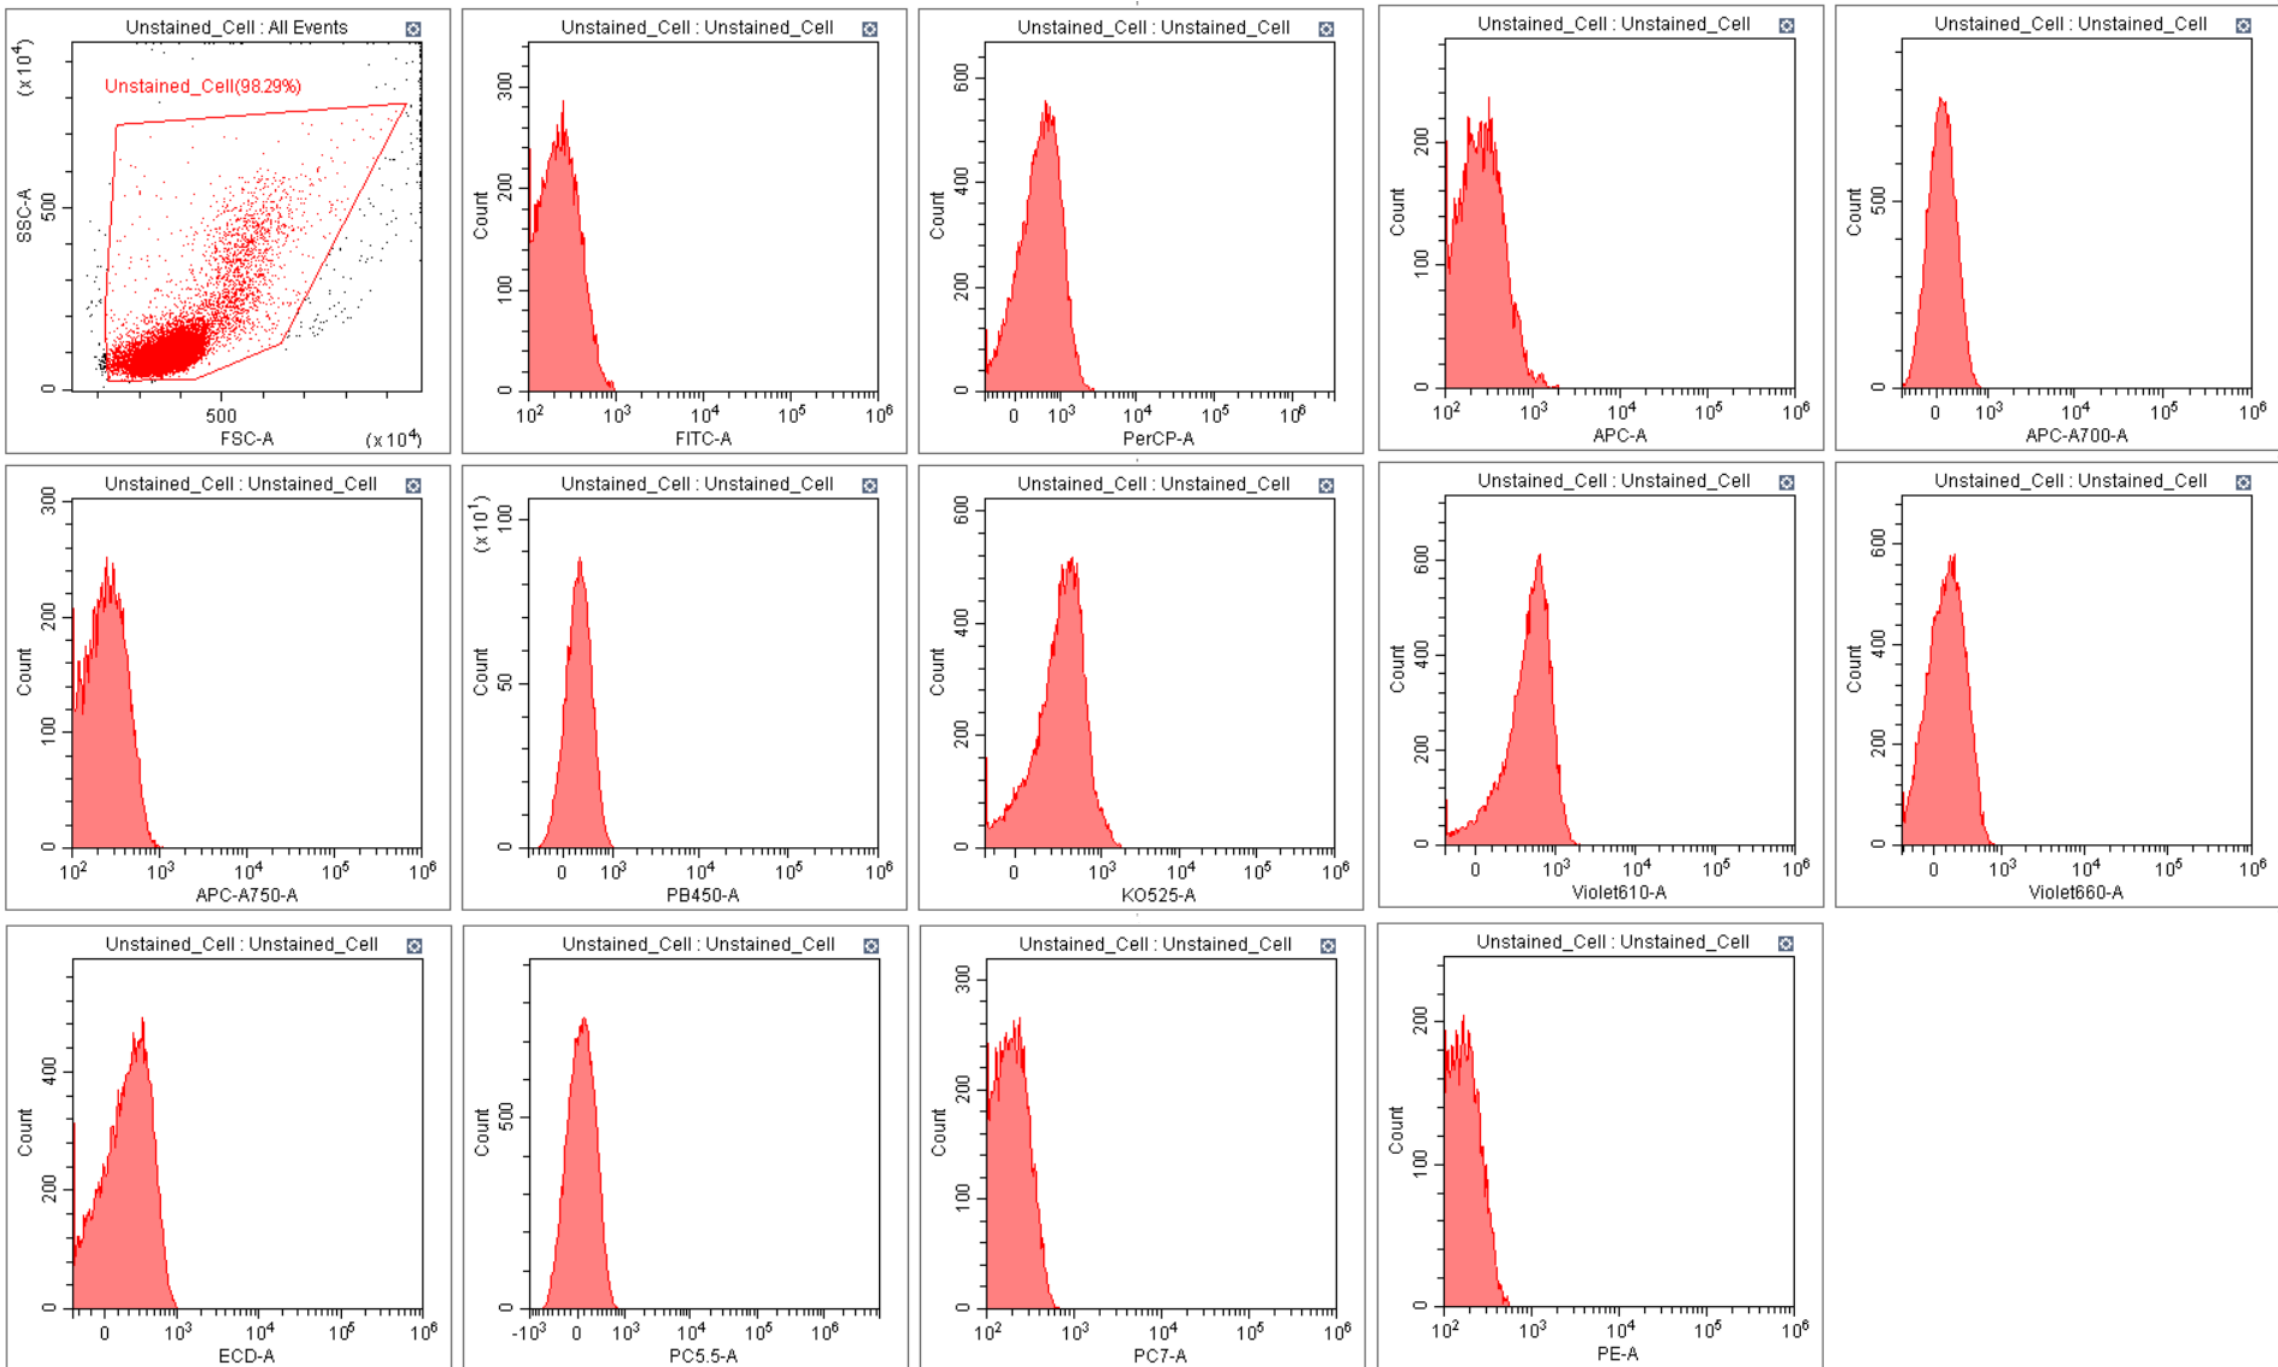

# SNA-FITC

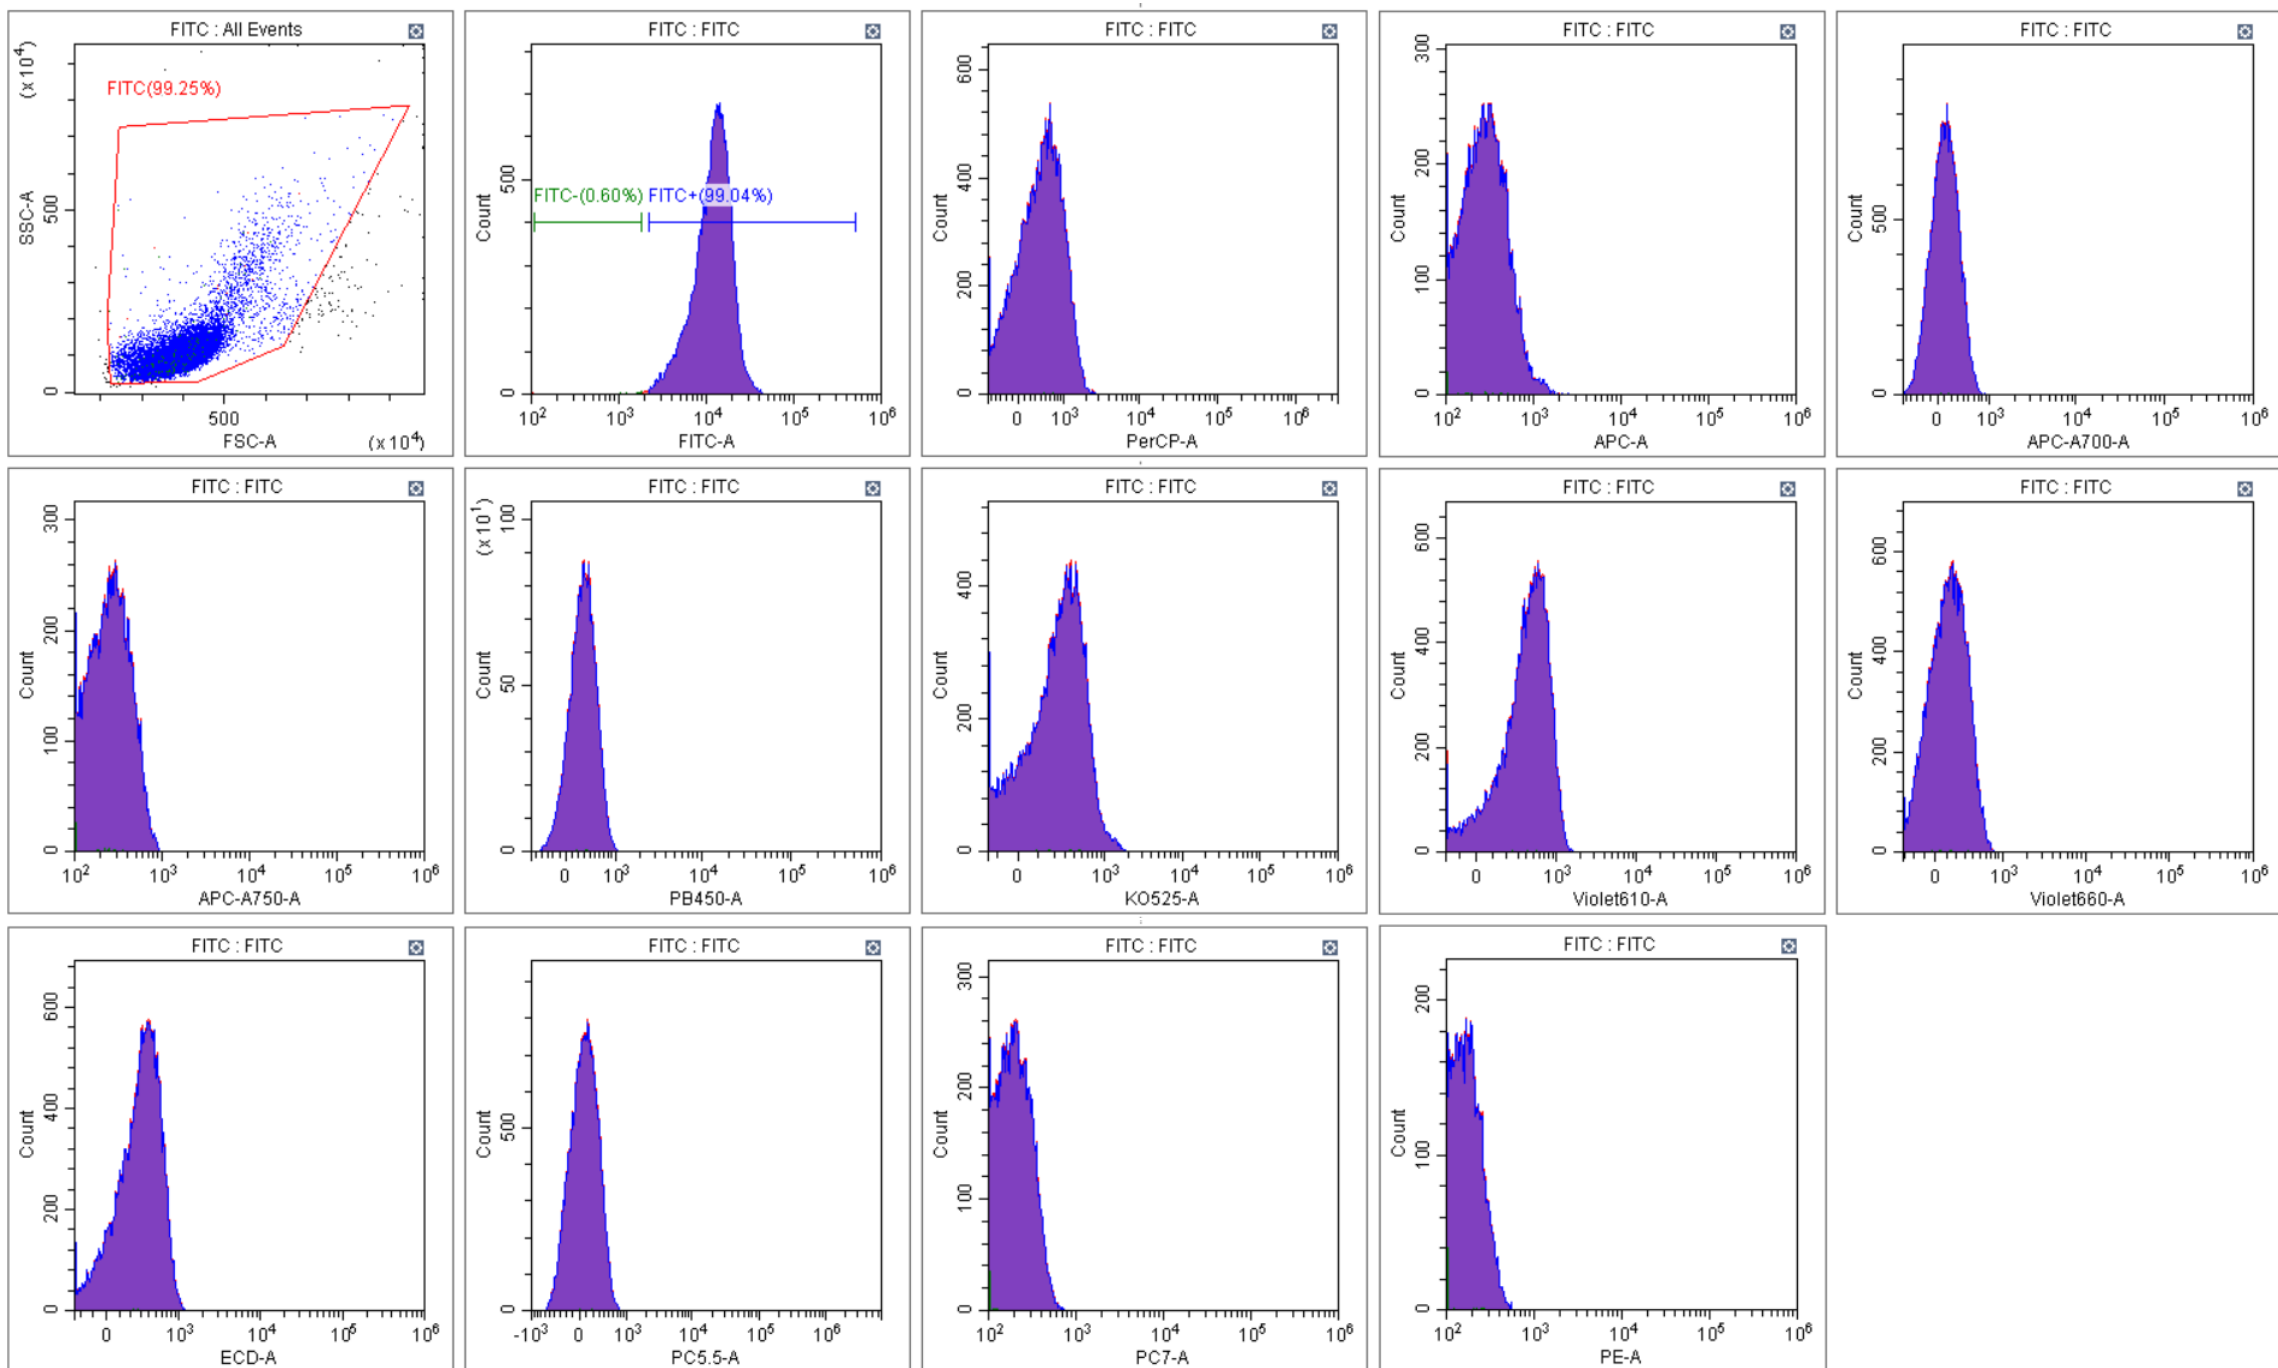



# CD38-PerCP

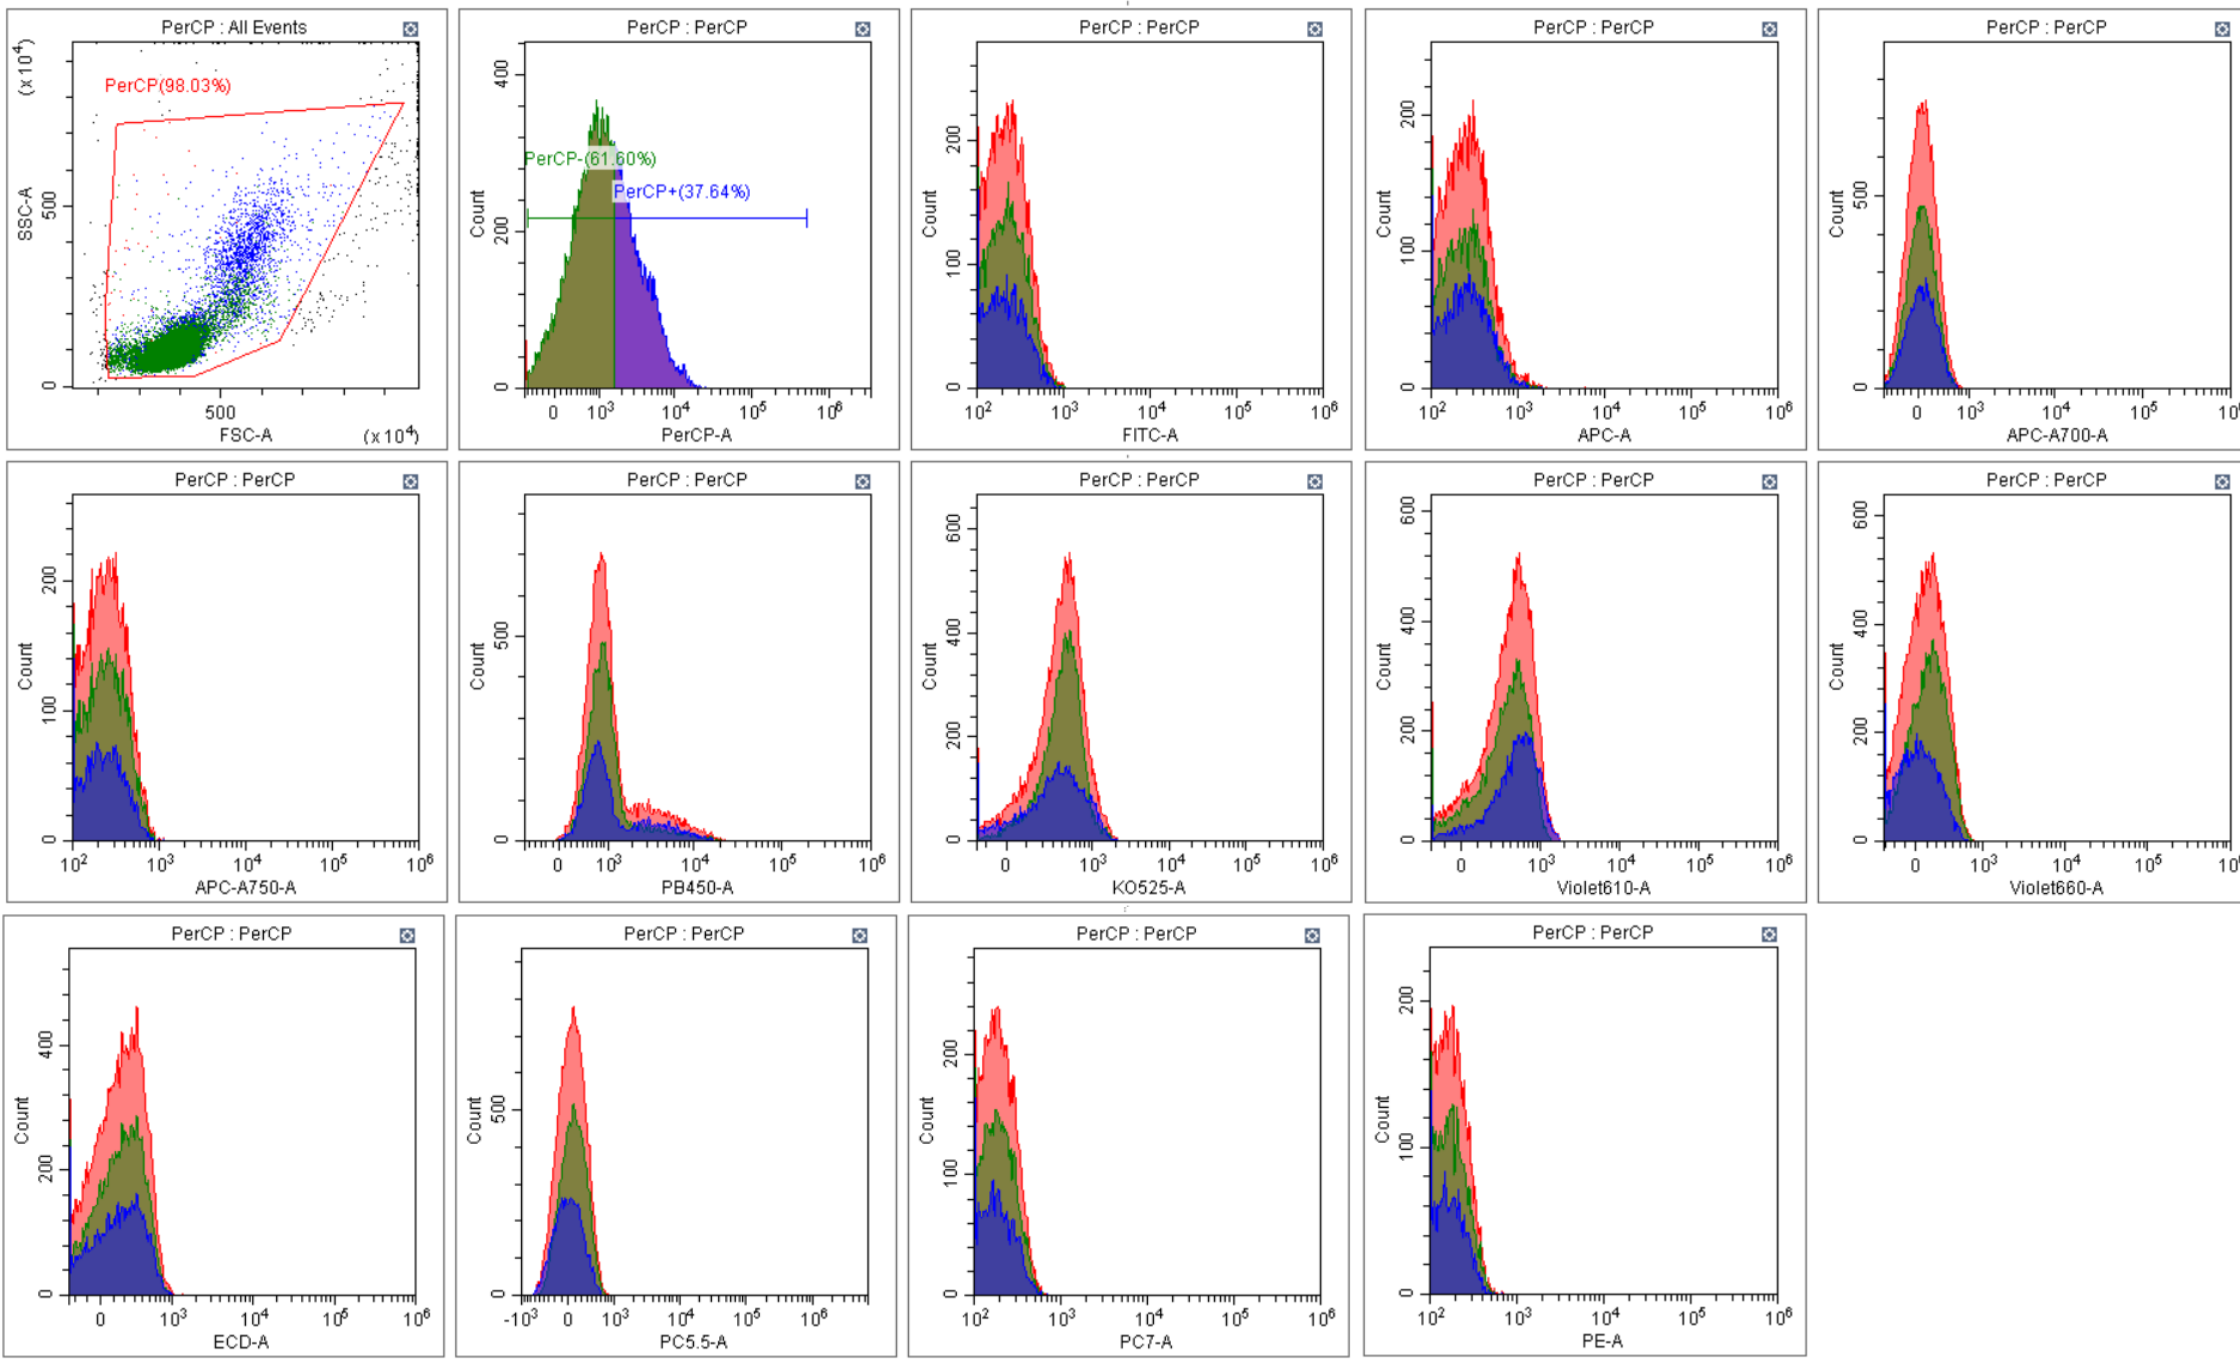

# AAL-APC

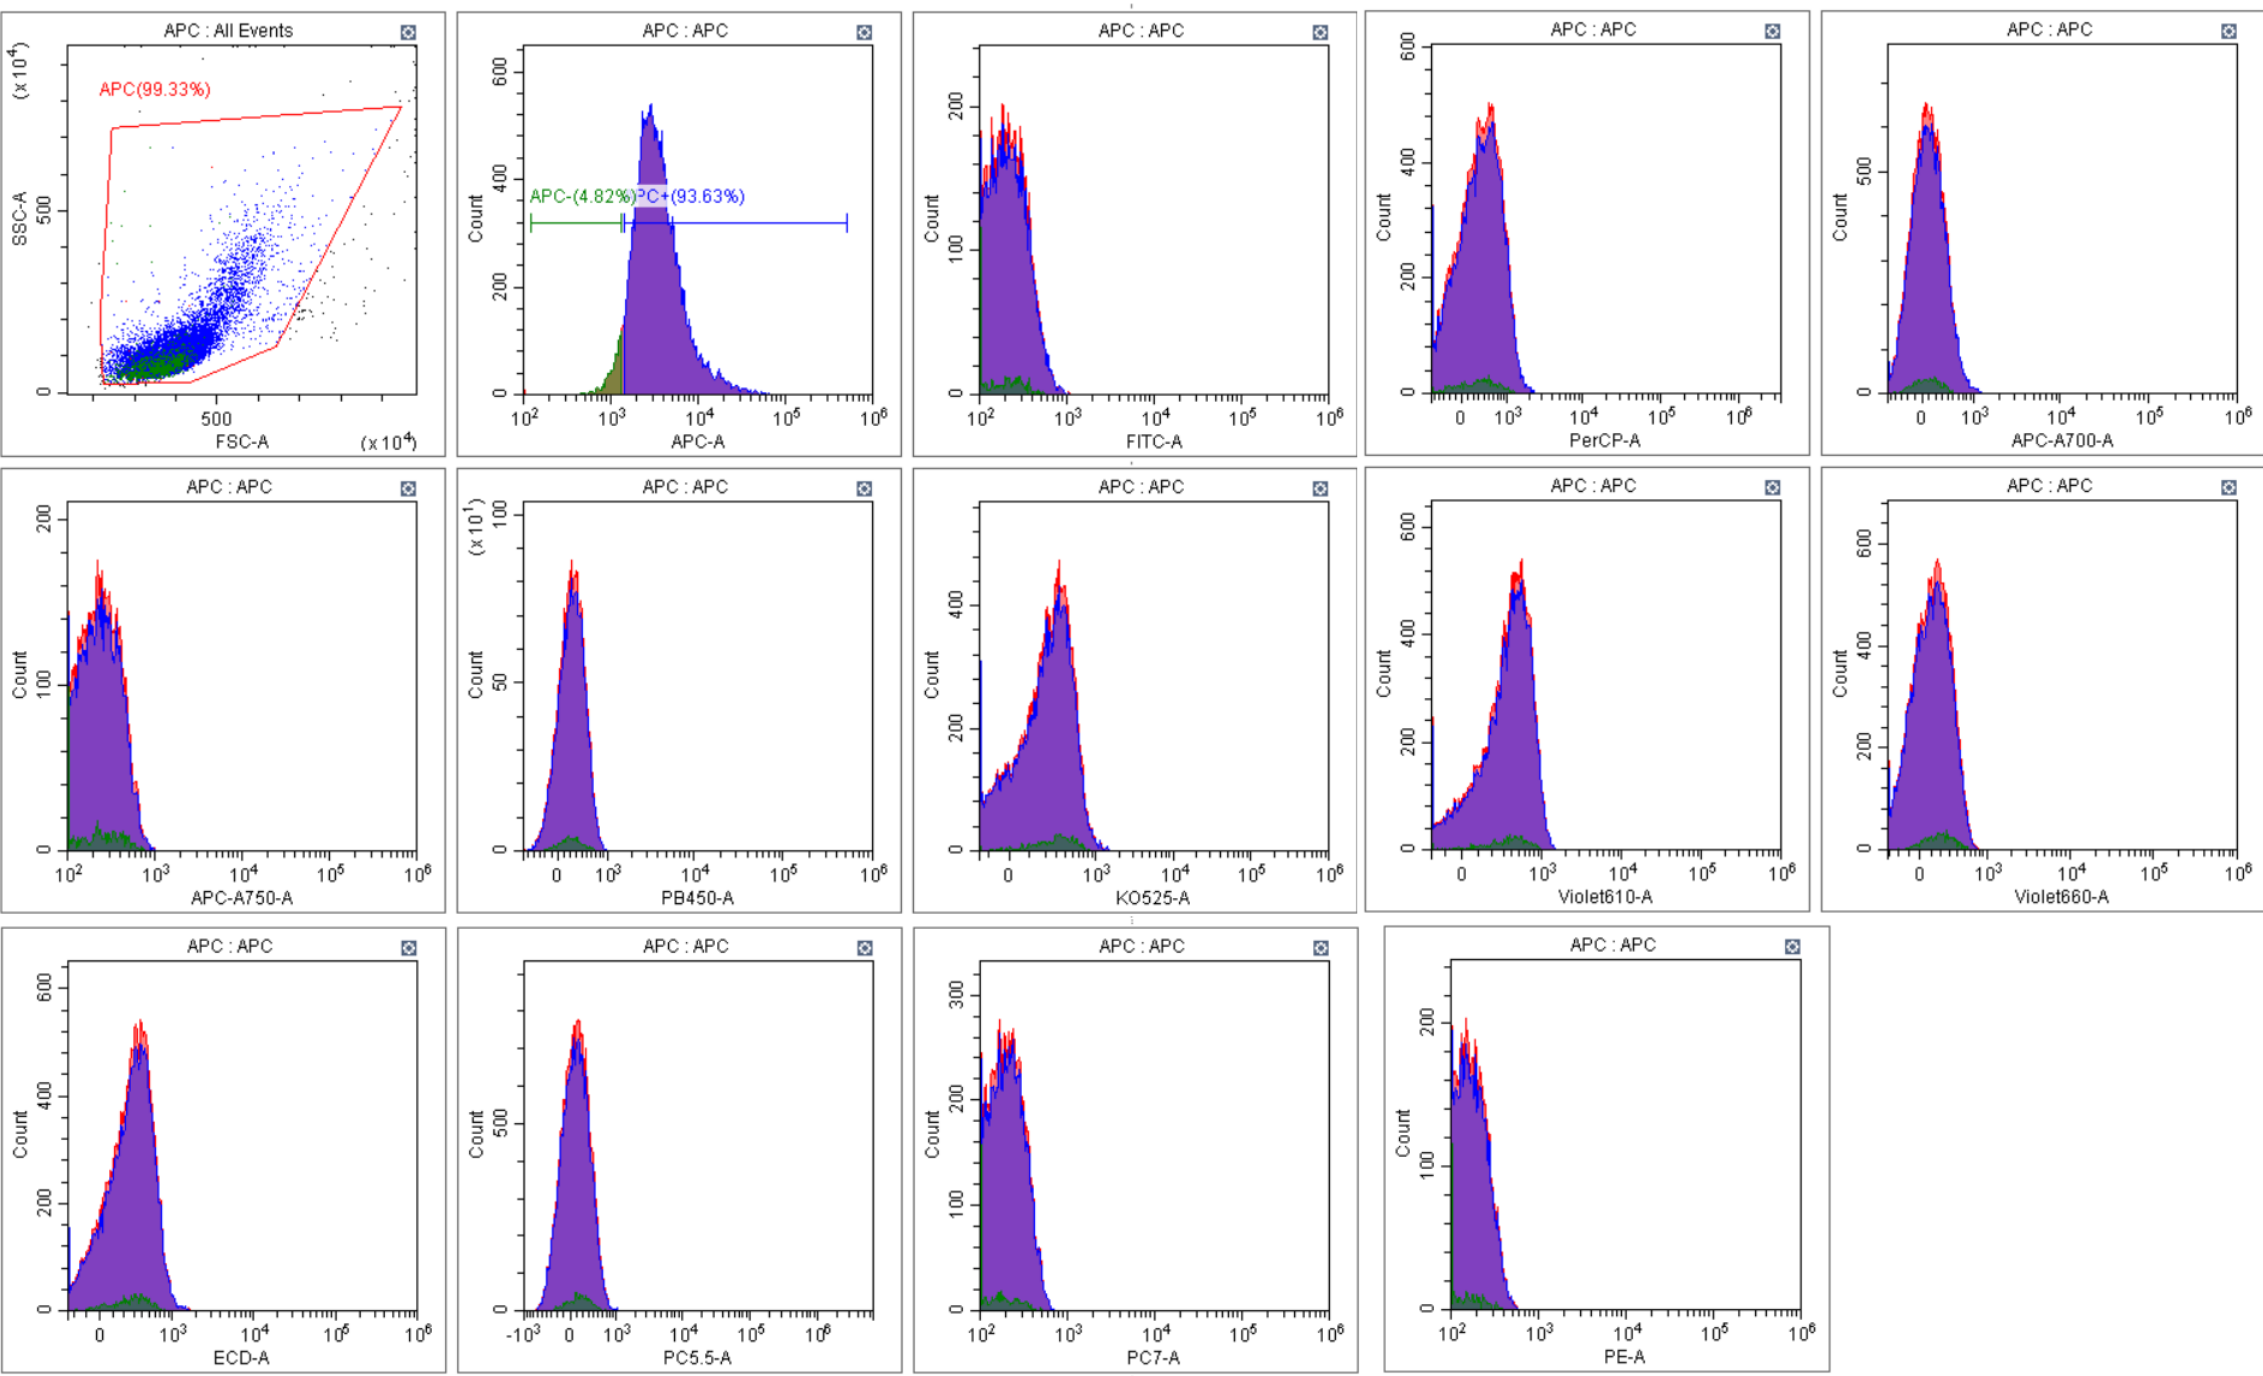

# CD16-AlexaFluor700

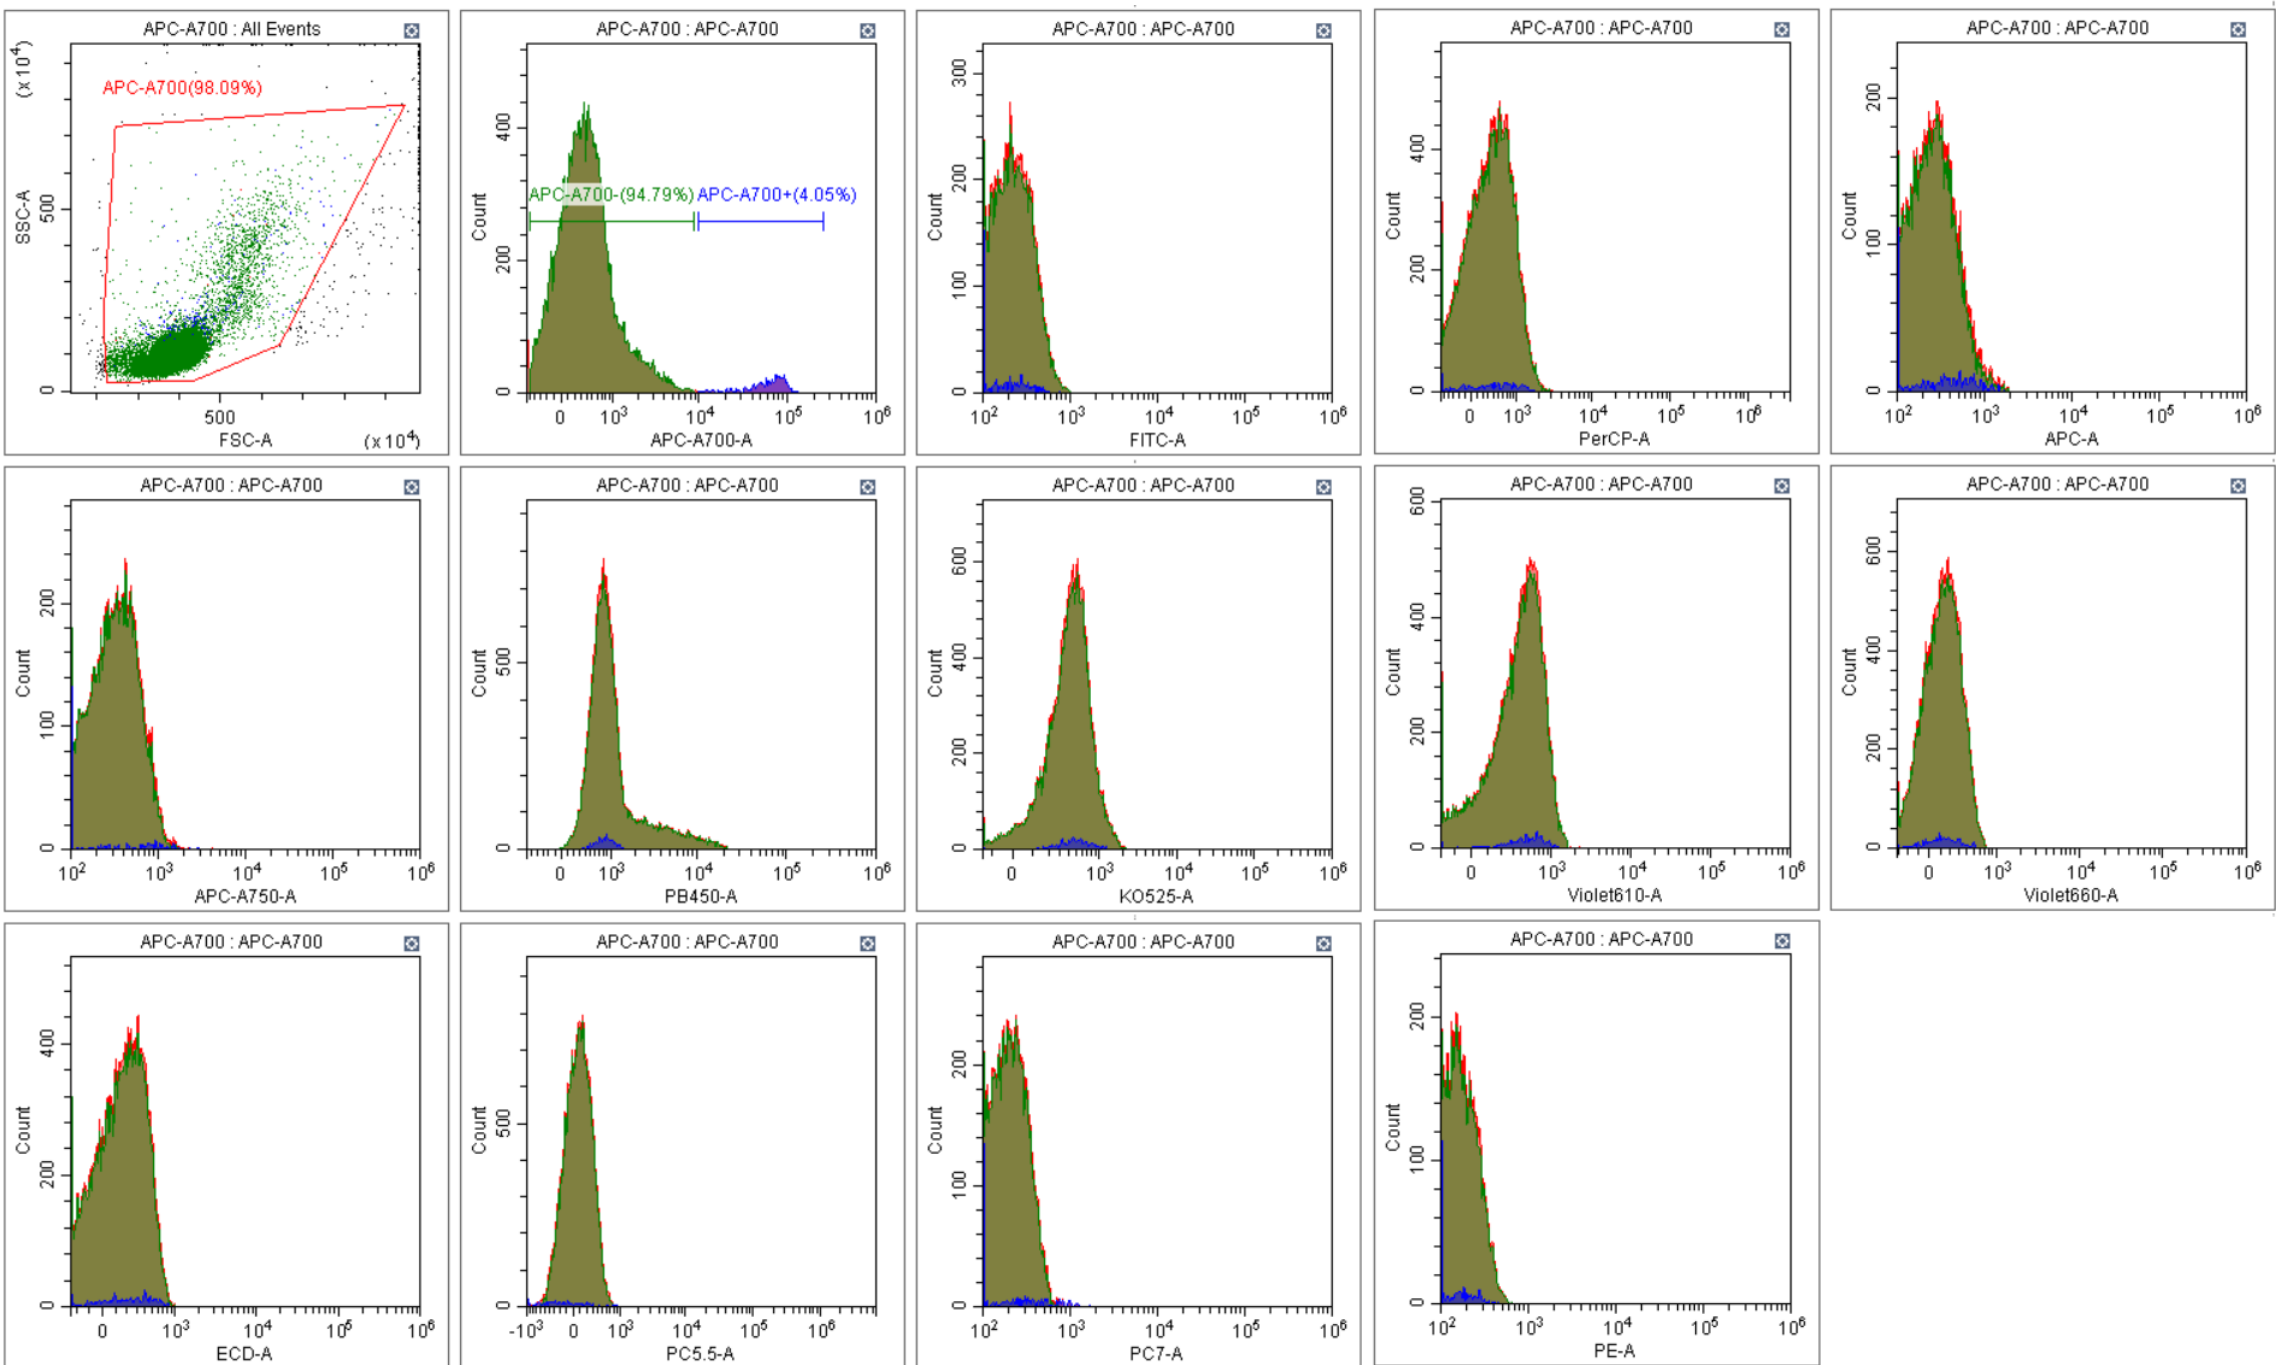

# Gal-3 APC-Cy7

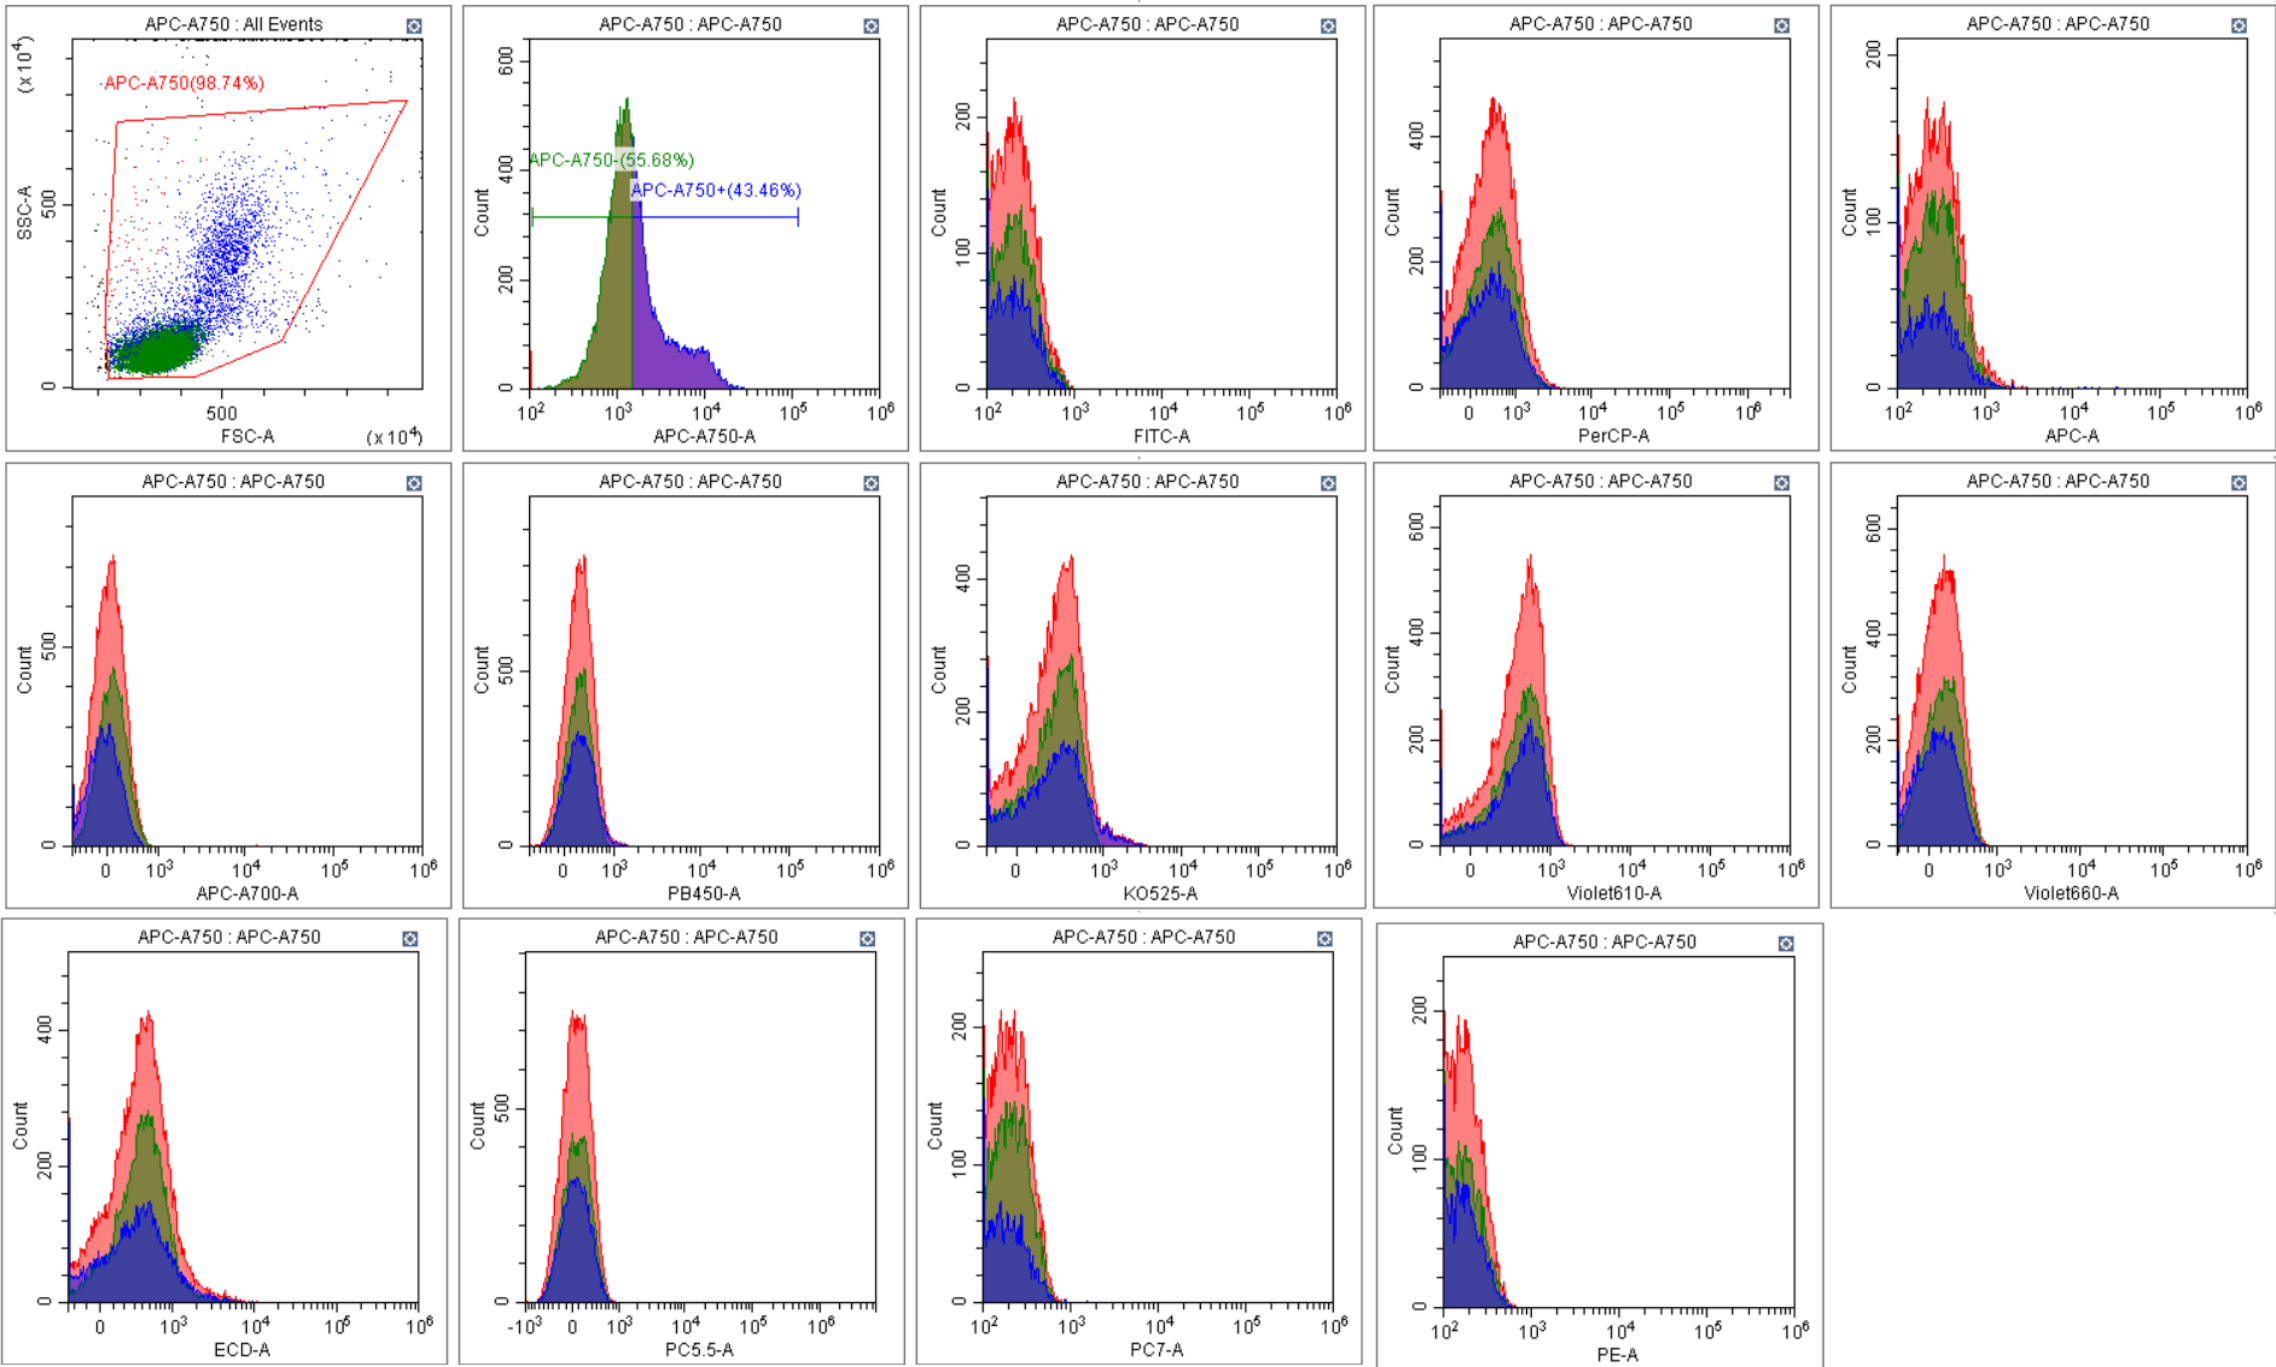

# CD27-Pacific Blue

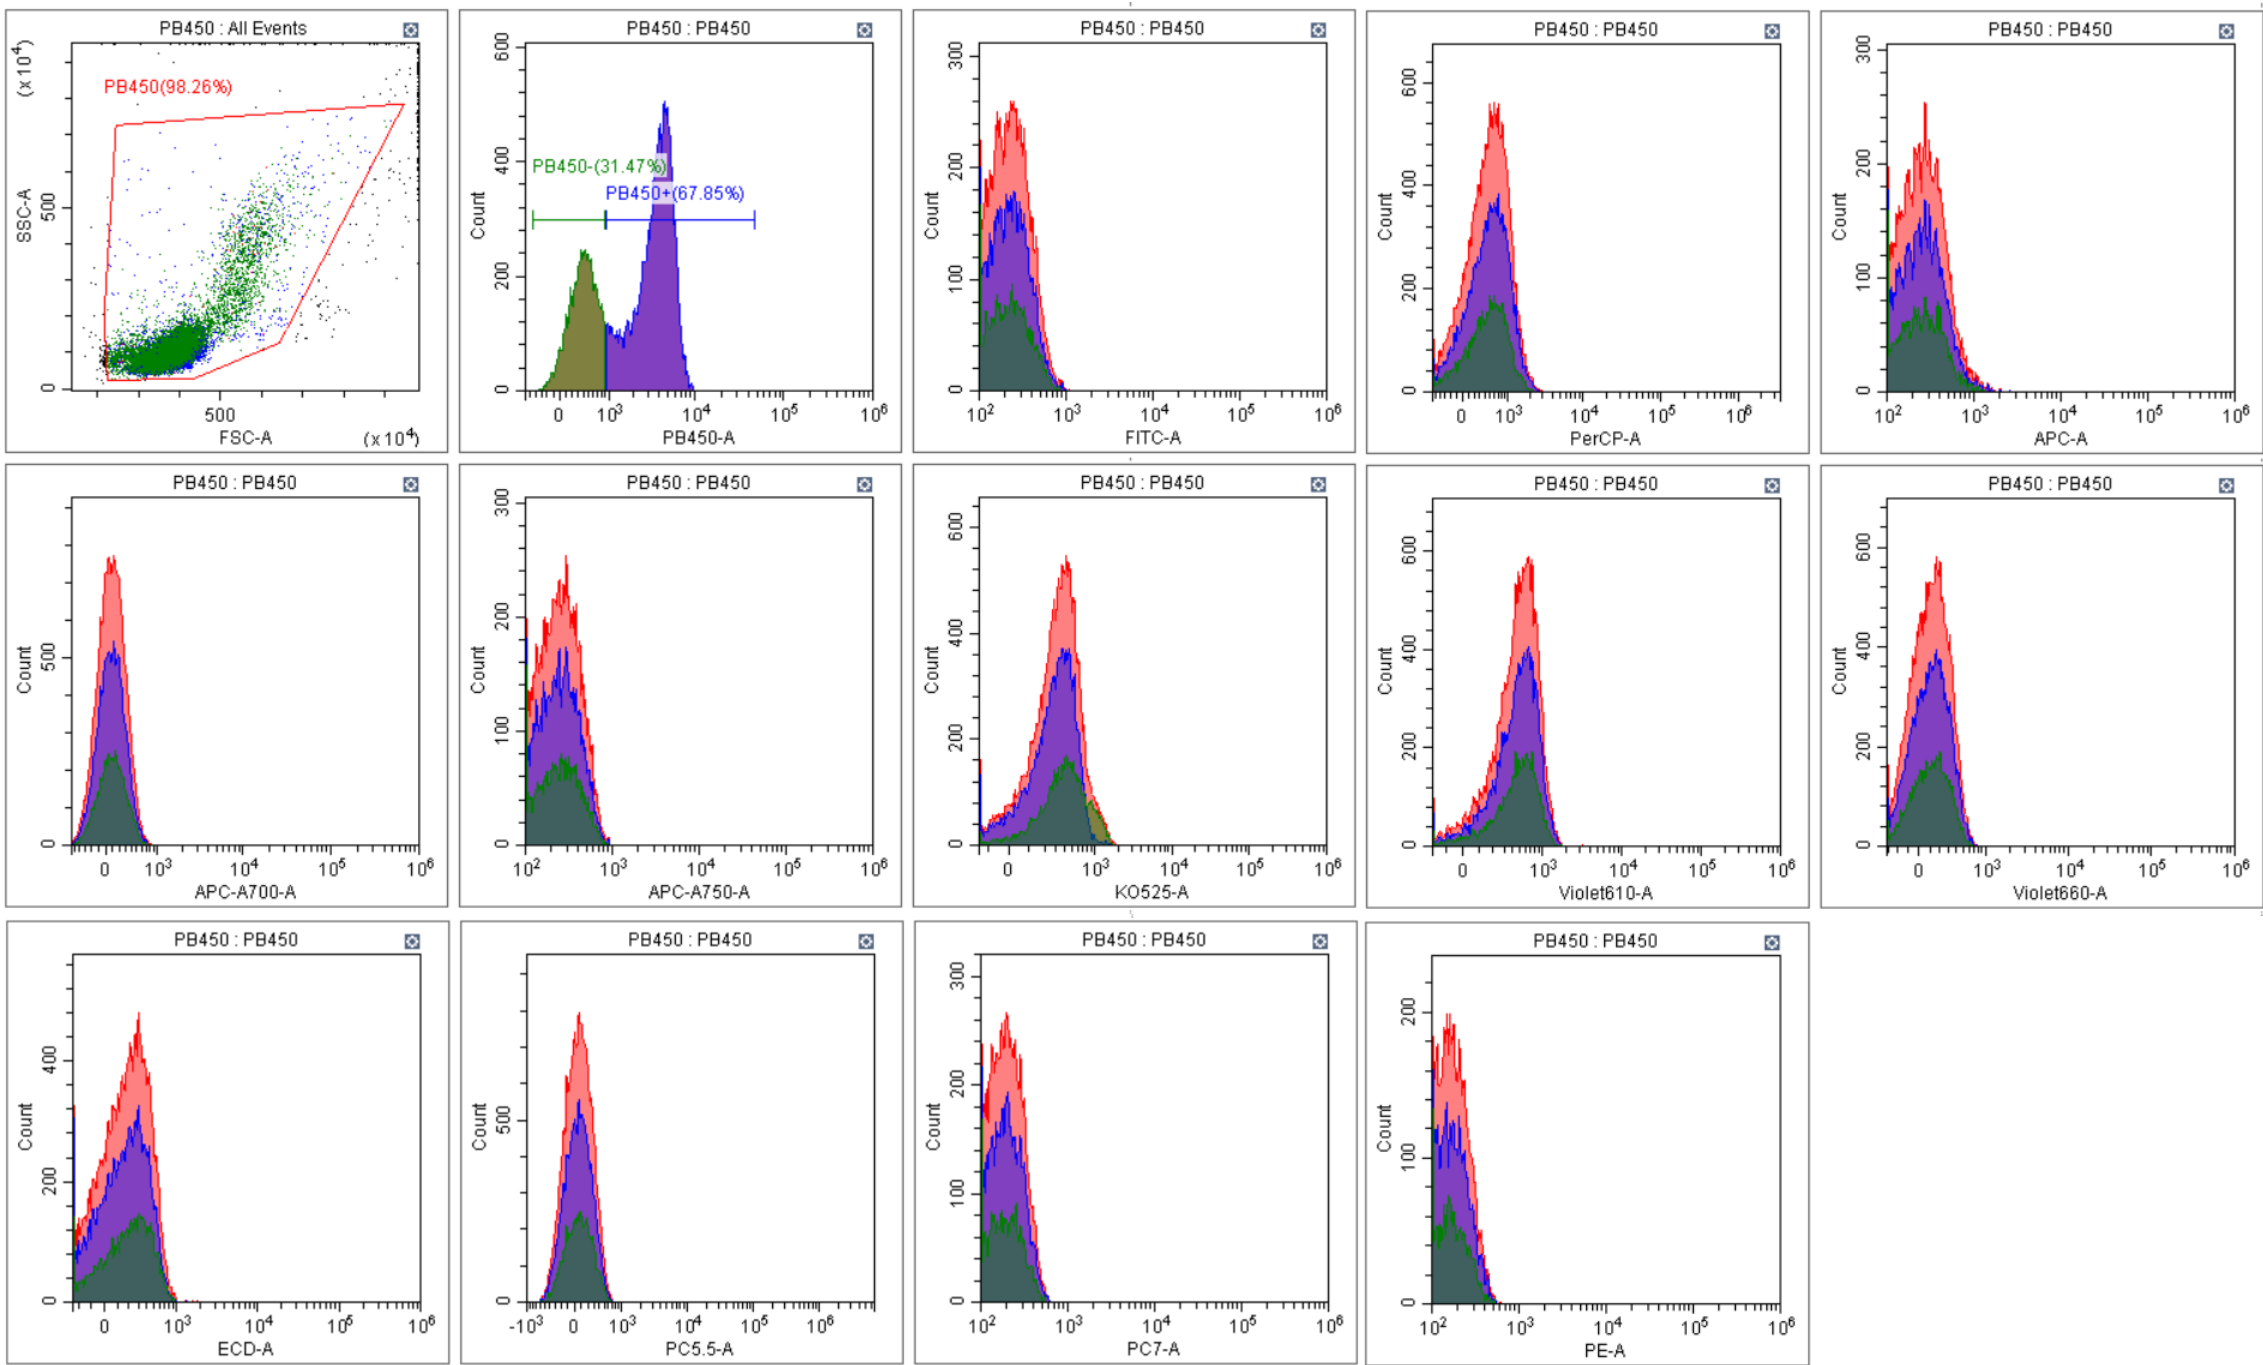

# Viability 405/520

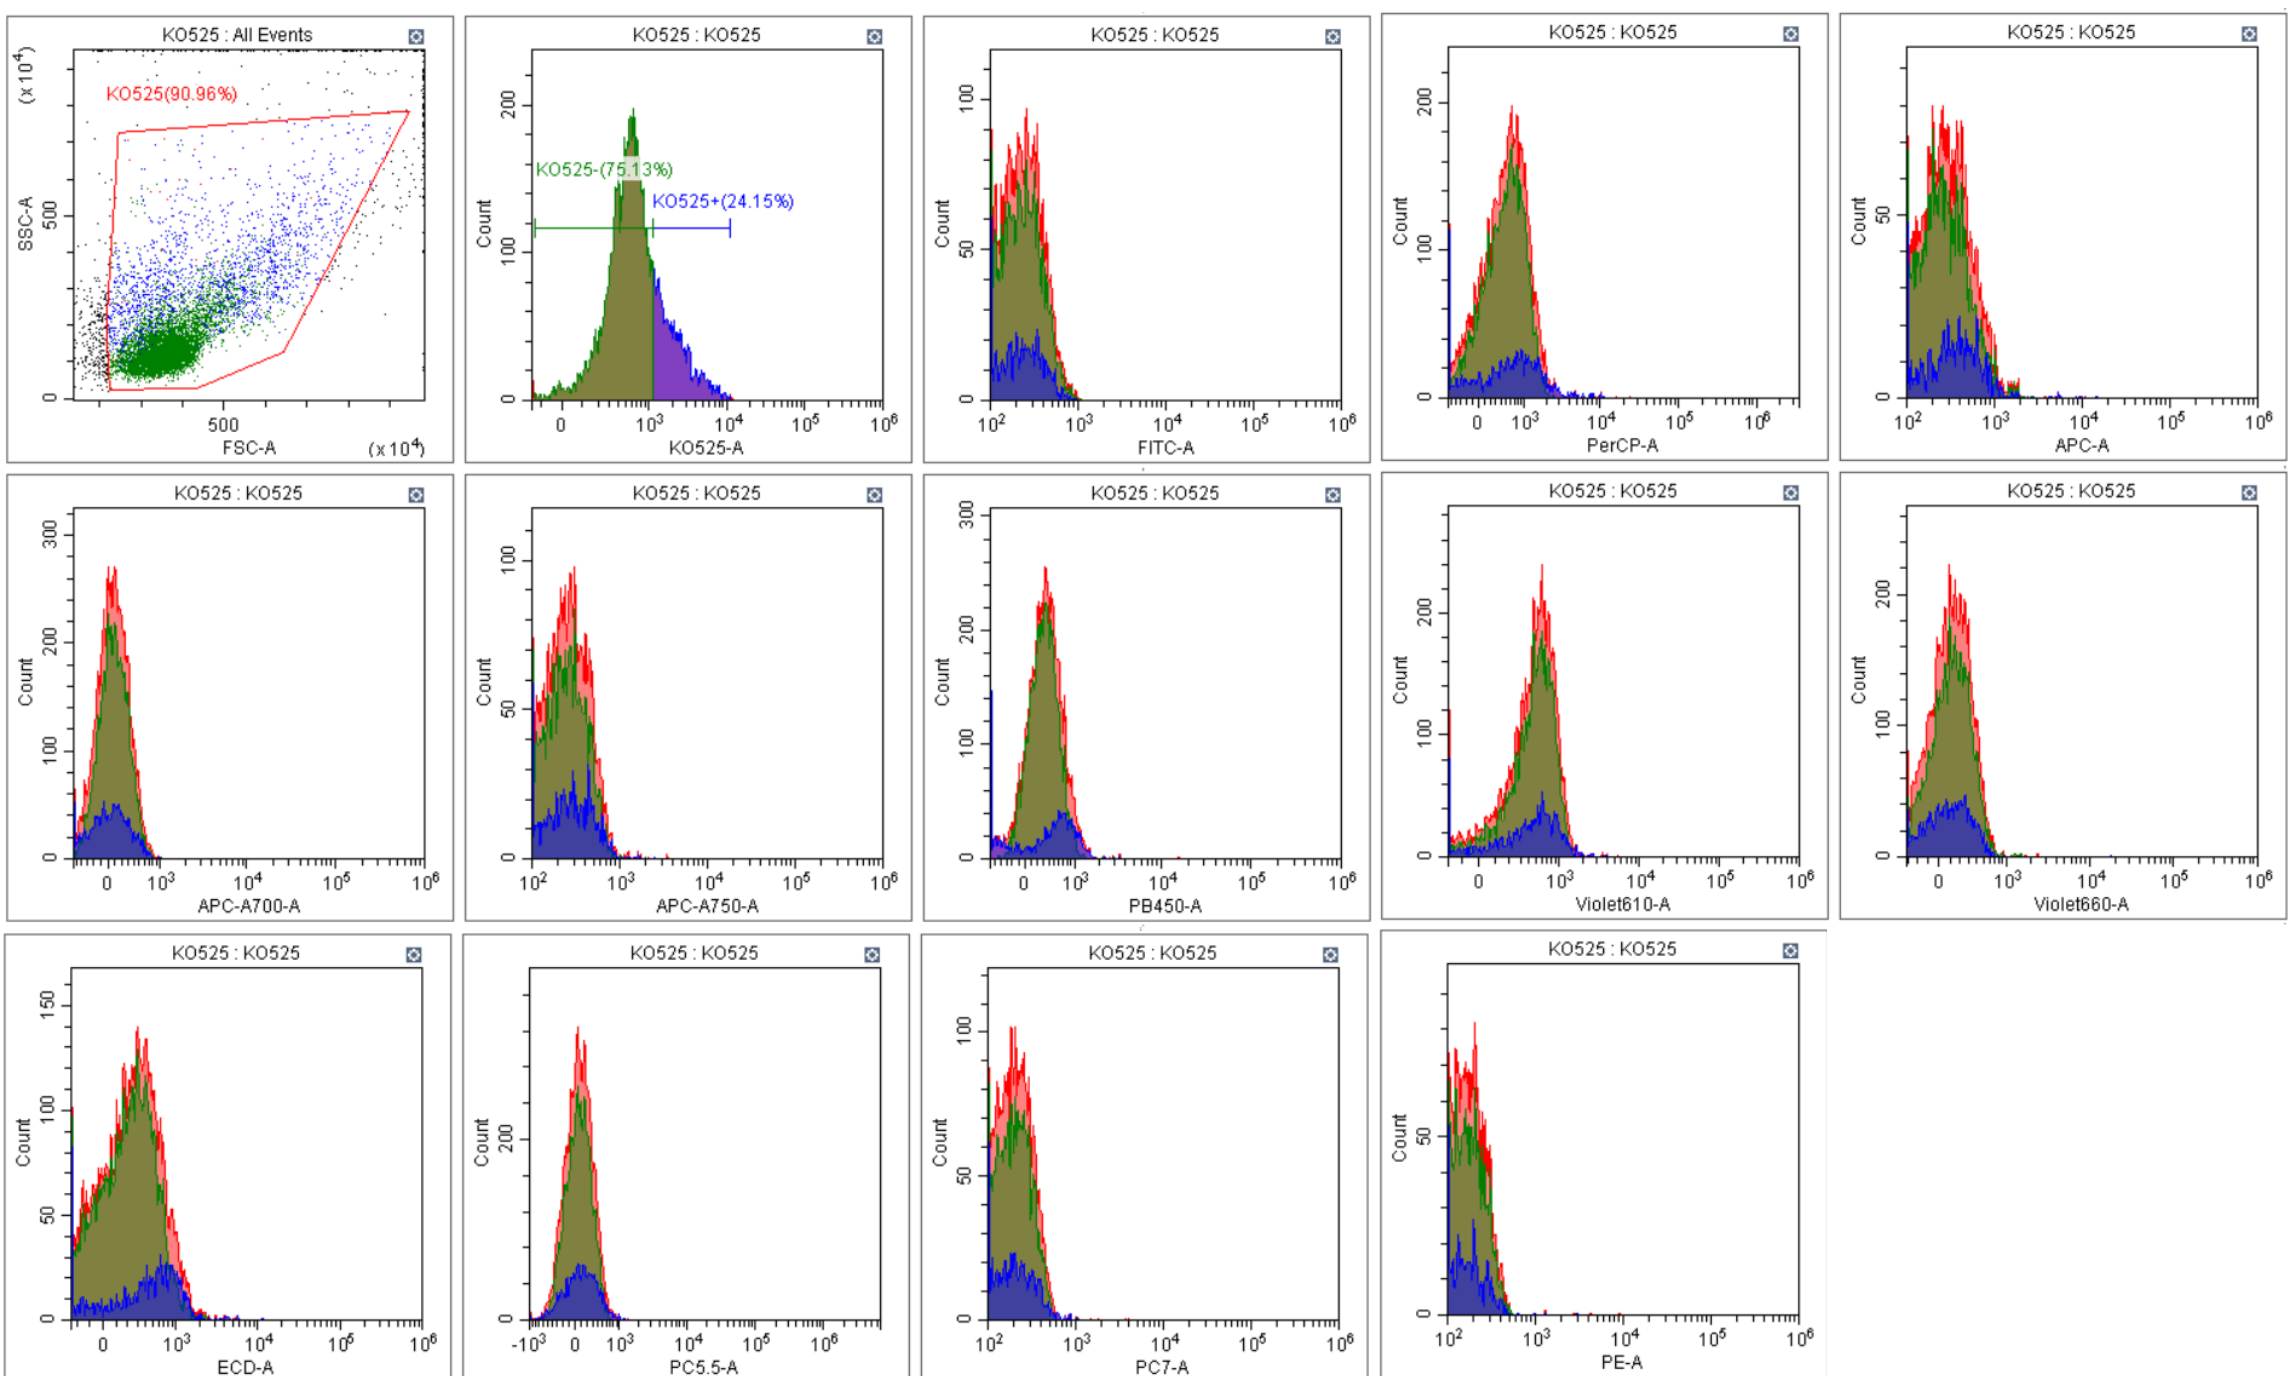

# CD19-Brilliant Violet 605

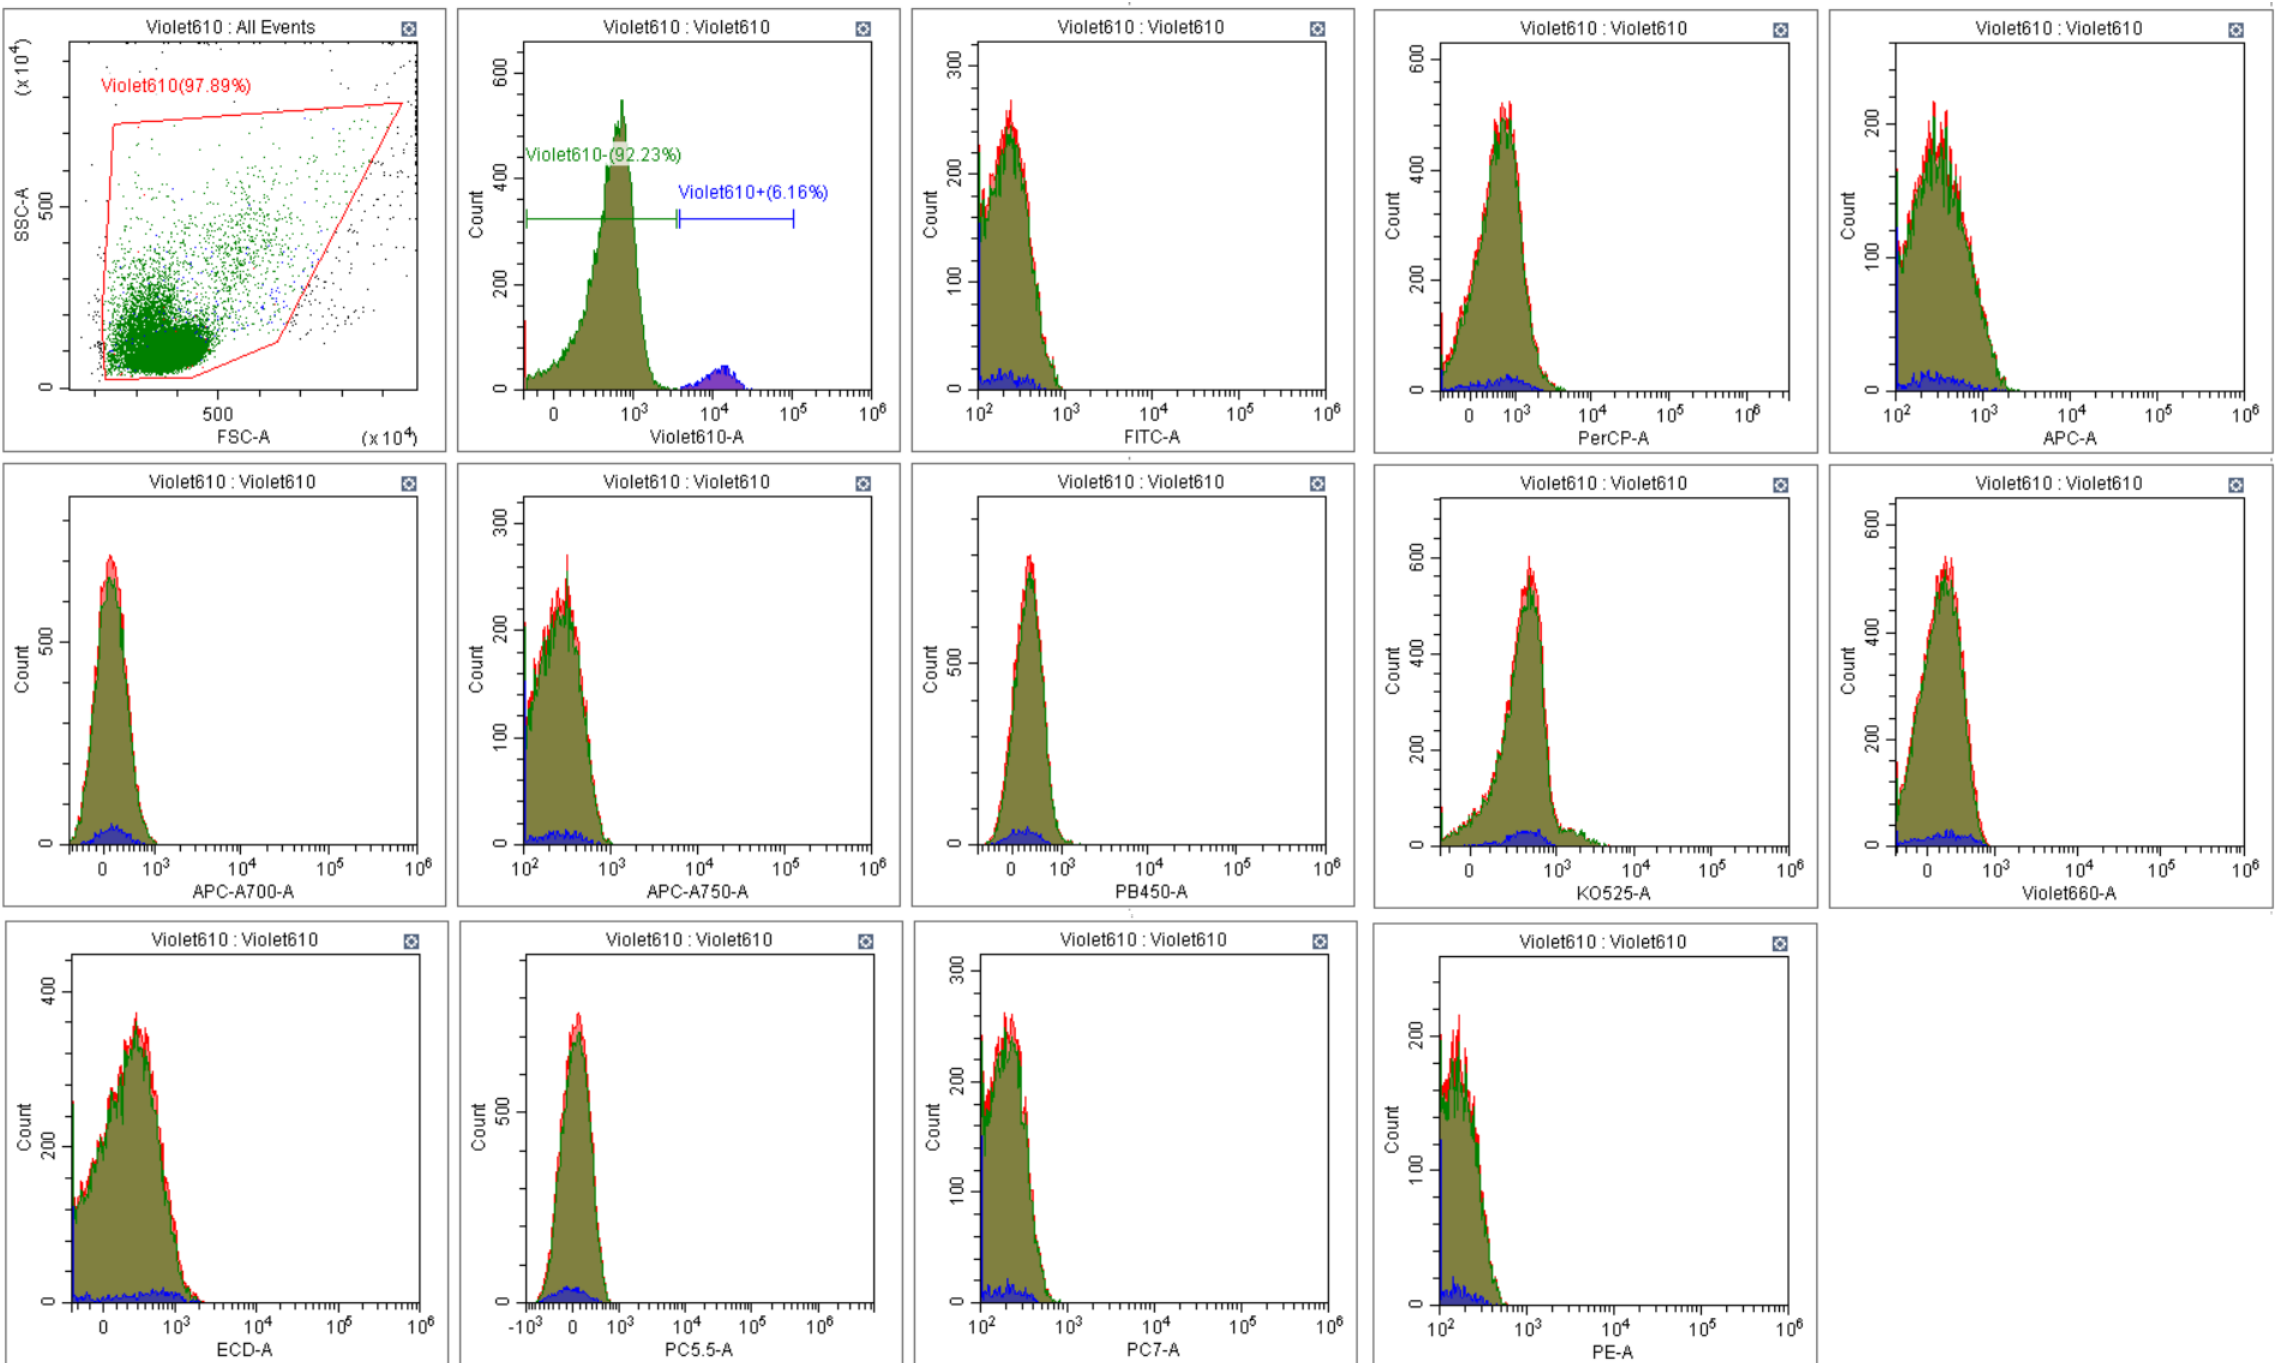

# CD14-Brialliant Violet 650

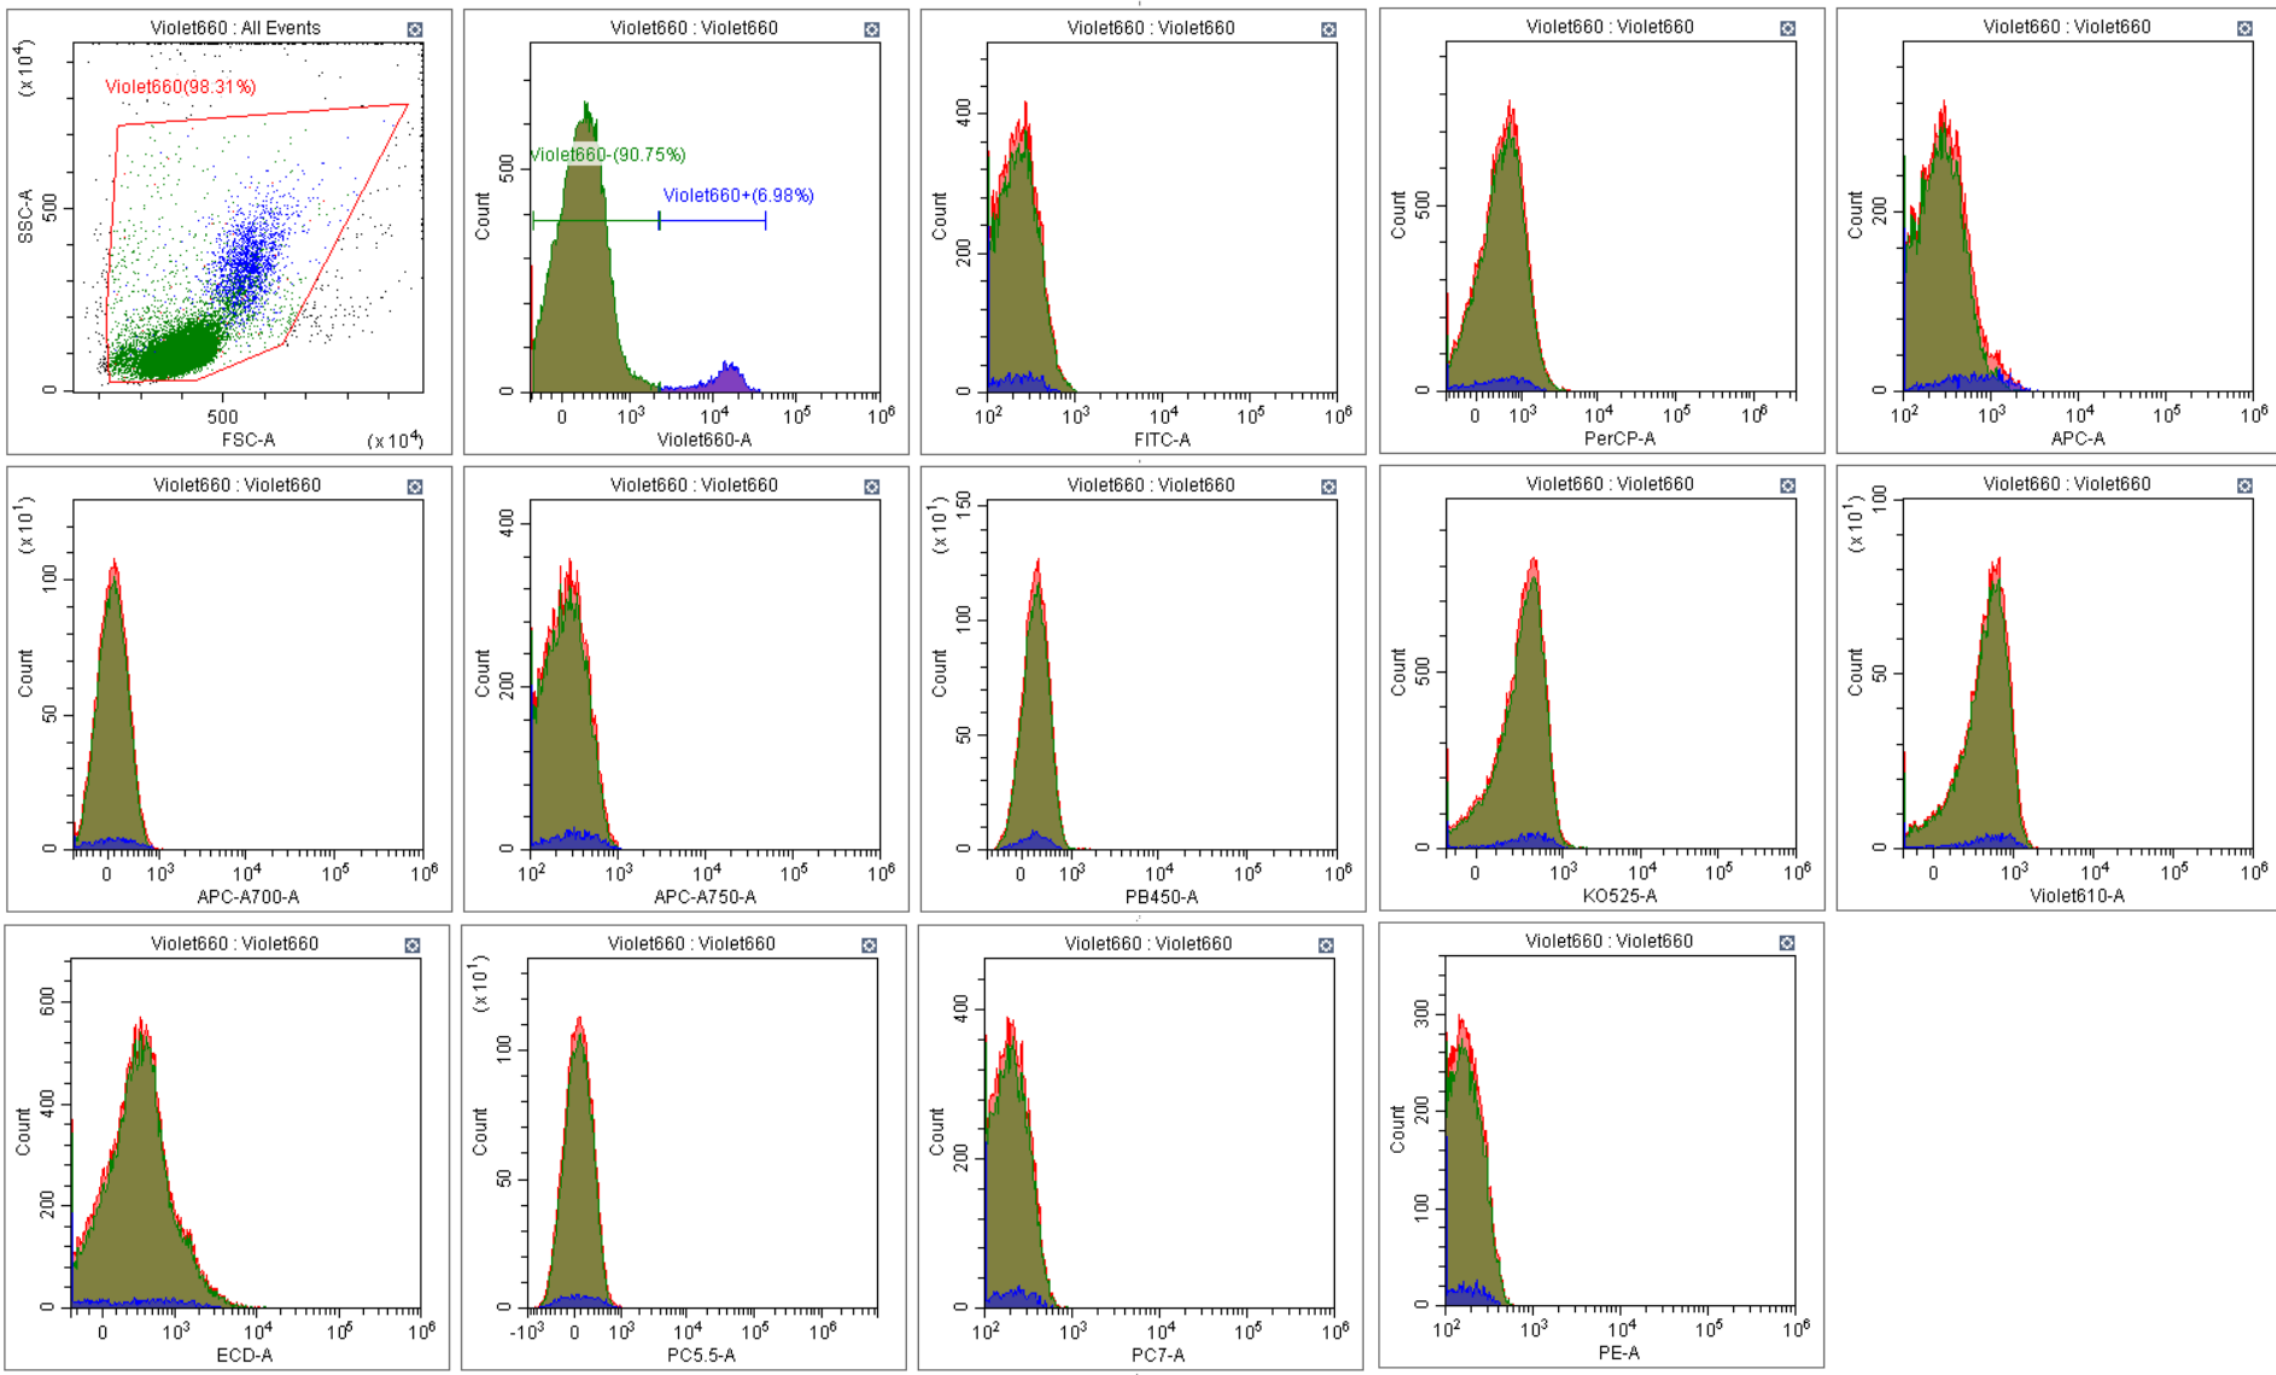



# Siglec-1 PE-Texas Red

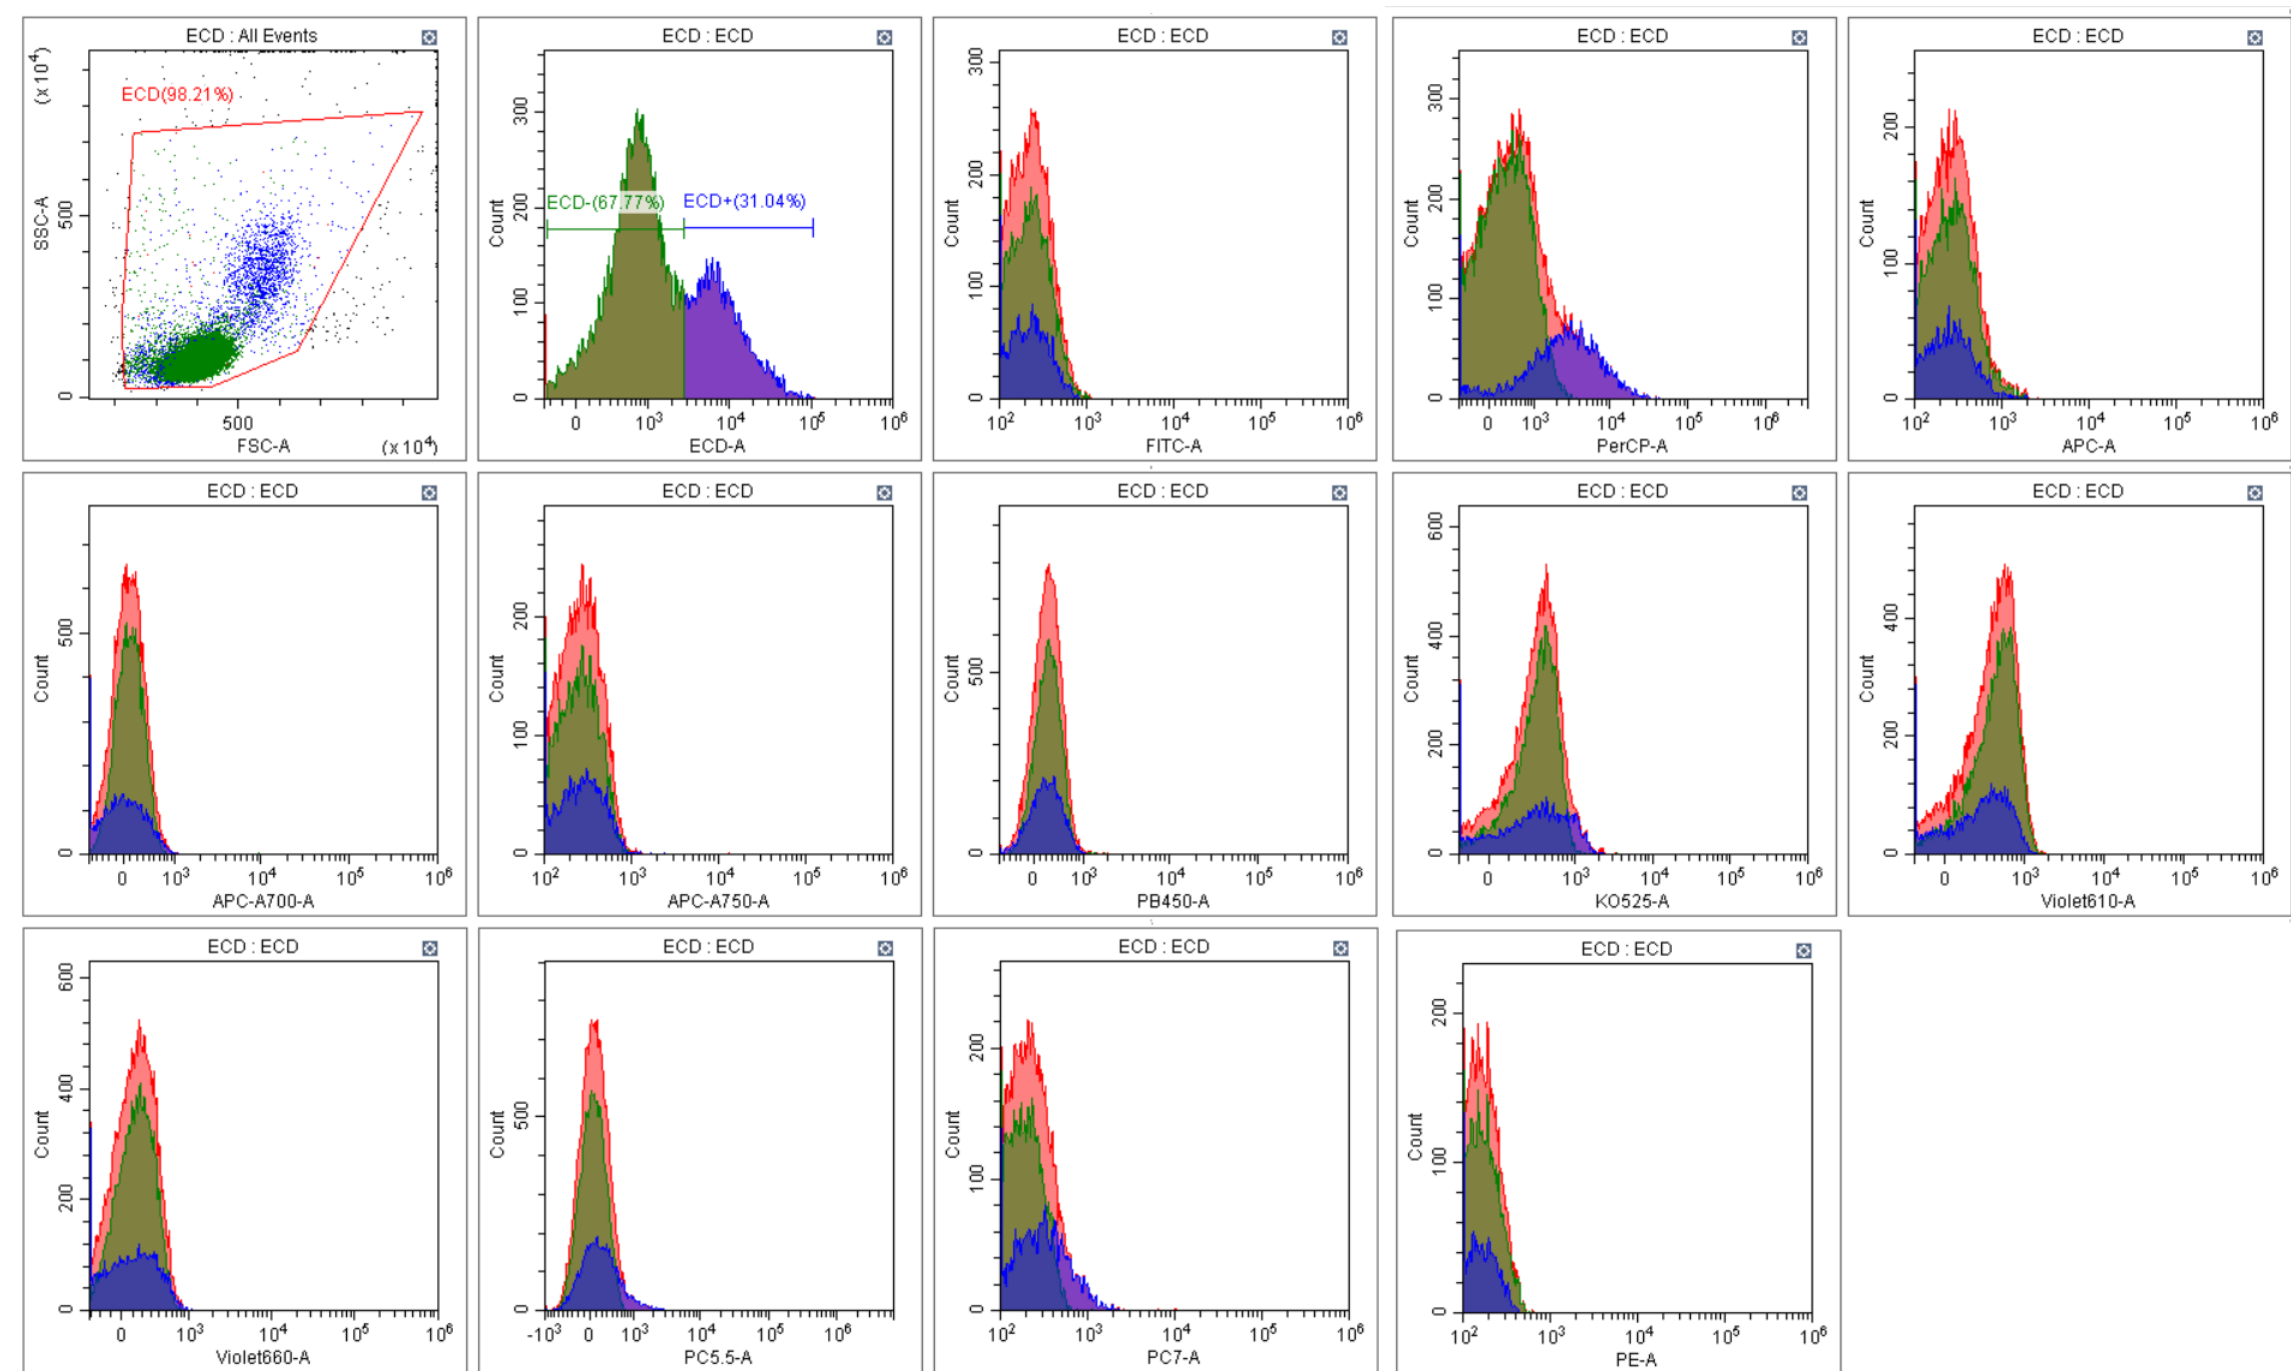

# HLA-DR NovaFluorYellow 690

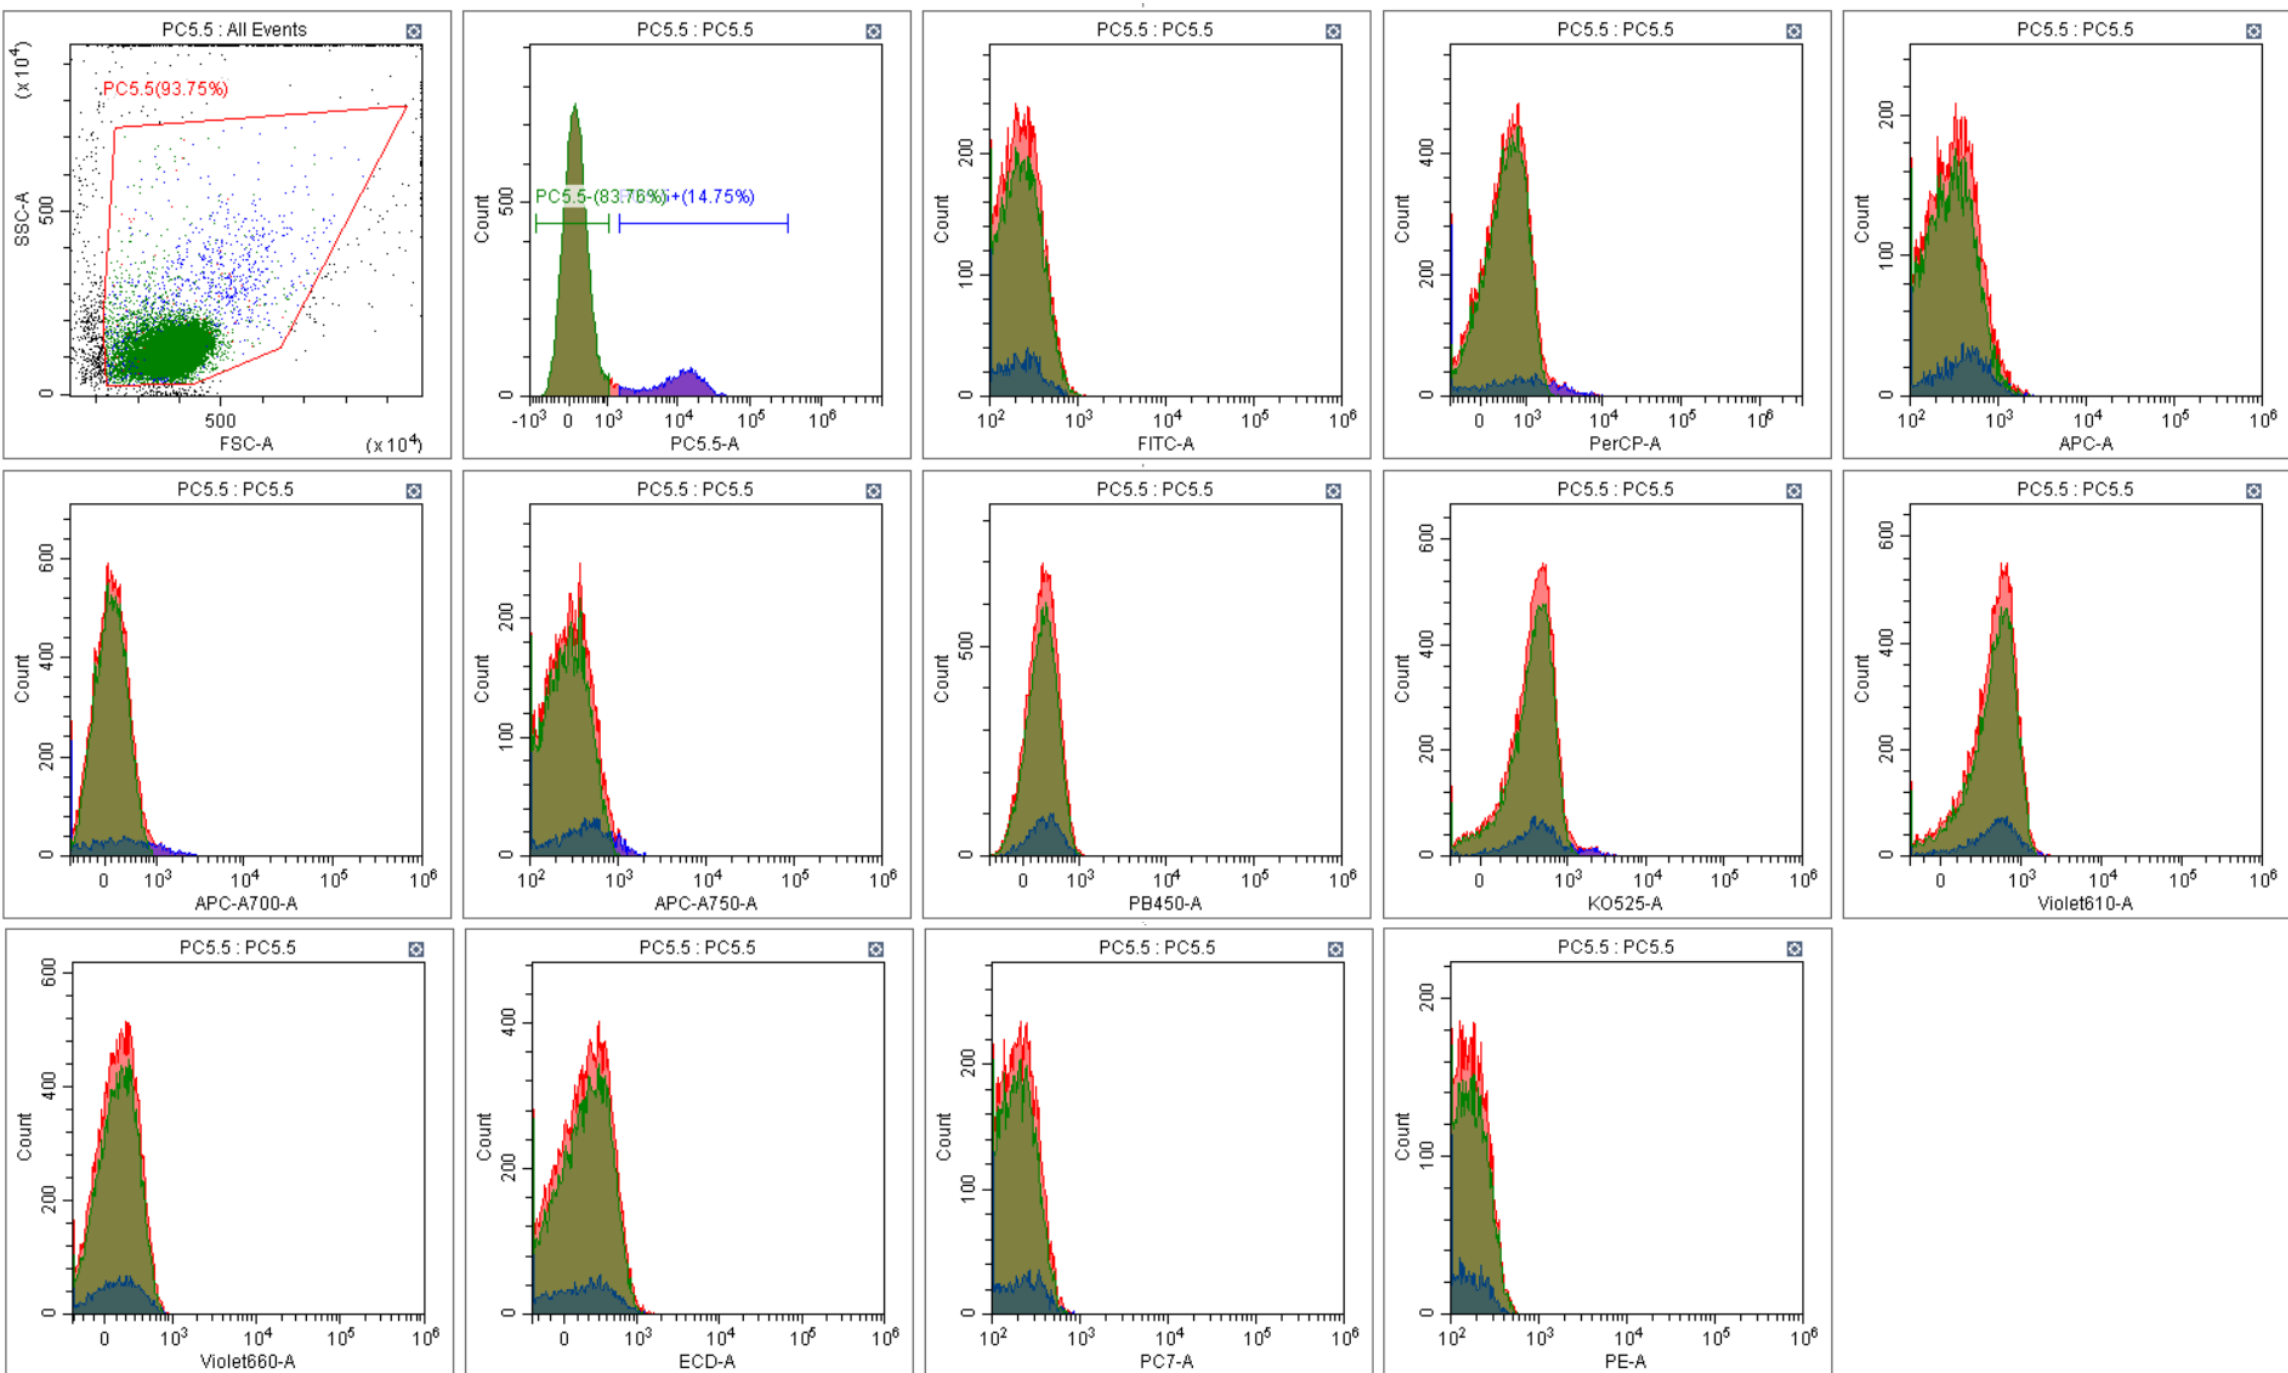

# Gal-1 PE-Cy7

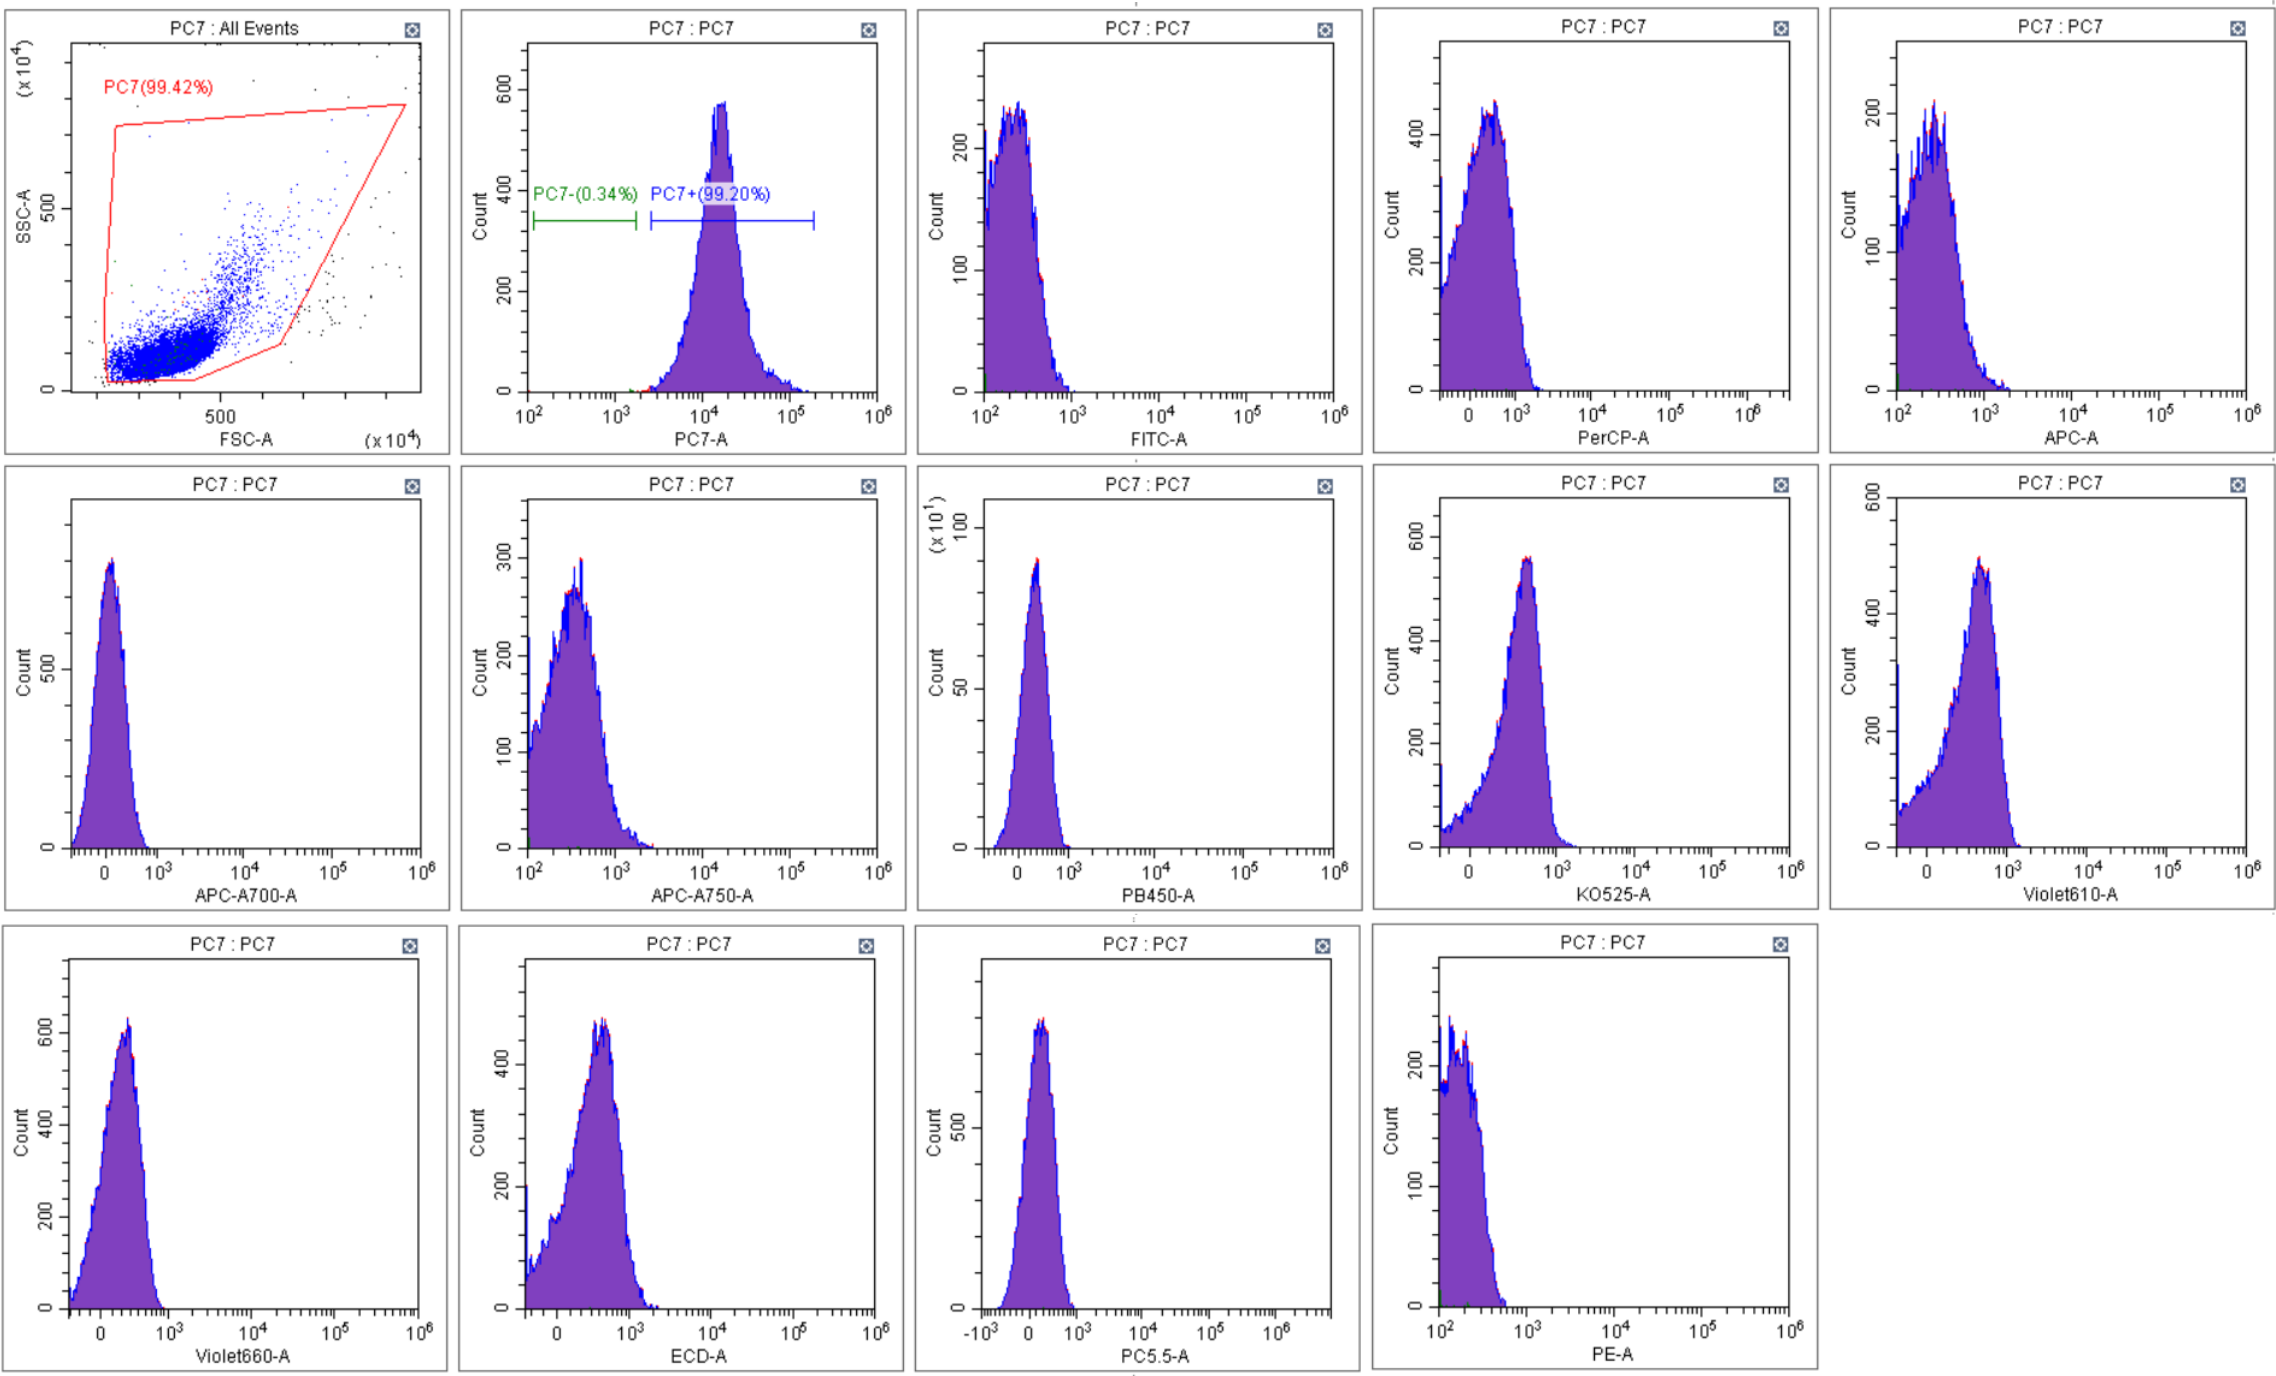

Supplement: DataSheet_1.pdf [file DataSheet_1.pdf]
